# Supplementary material for: Importance of accounting for loss to follow-up when comparing mortality between immigrants and long-term residents: a population-based retrospective cohort
Source: PubMed Central journal article supplement — BMJ Open. 2021 Nov 1;11(11):e046377. doi: 10.1136/bmjopen-2020-046377 (PMC8565574; doi:10.1136/bmjopen-2020-046377), 2021-11-01
Supplement: bmjopen-2020-046377.draft_revisions.pdf [file bmjopen-2020-046377.draft_revisions.pdf]

# BMJ Open

BMJ Open is committed to open peer review. As part of this commitment we make the peer review history of every article we publish publicly available.

When an article is published we post the peer reviewers' comments and the authors' responses online. We also post the versions of the paper that were used during peer review. These are the versions that the peer review comments apply to.

The versions of the paper that follow are the versions that were submitted during the peer review process. They are not the versions of record or the final published versions. They should not be cited or distributed as the published version of this manuscript.

BMJ Open is an open access journal and the full, final, typeset and author-corrected version of record of the manuscript is available on our site with no access controls, subscription charges or pay-per-view fees (<http://bmjopen.bmj.com>).

If you have any questions on BMJ Open's open peer review process please email [info.bmjopen@bmj.com](mailto:info.bmjopen@bmj.com)

# BMJ Open

## Immigration Status and Mortality: The Importance of Accounting for Loss to Follow-up

|                               |                                                                                                                                                                                                                                                                                                                   |
|-------------------------------|-------------------------------------------------------------------------------------------------------------------------------------------------------------------------------------------------------------------------------------------------------------------------------------------------------------------|
| Journal:                      | <i>BMJ Open</i>                                                                                                                                                                                                                                                                                                   |
| Manuscript ID                 | bmjopen-2020-046377                                                                                                                                                                                                                                                                                               |
| Article Type:                 | Original research                                                                                                                                                                                                                                                                                                 |
| Date Submitted by the Author: | 28-Oct-2020                                                                                                                                                                                                                                                                                                       |
| Complete List of Authors:     | Vyas, Manav; University of Toronto, Division of Neurology<br>Fang, Jiming; ICES<br>Austin, Peter; Institute for Clinical Evaluative Sciences,<br>Laupacis, Andreas; University of Toronto<br>Cheung, Matthew; University of Toronto<br>Silver, Frank ; University of Toronto<br>Kapral, MK; University of Toronto |
| Keywords:                     | EPIDEMIOLOGY, SOCIAL MEDICINE, PUBLIC HEALTH                                                                                                                                                                                                                                                                      |
|                               |                                                                                                                                                                                                                                                                                                                   |

SCHOLARONE™  
Manuscripts

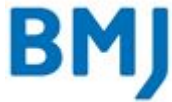

I, the Submitting Author has the right to grant and does grant on behalf of all authors of the Work (as defined in the below author licence), an exclusive licence and/or a non-exclusive licence for contributions from authors who are: i) UK Crown employees; ii) where BMJ has agreed a CC-BY licence shall apply, and/or iii) in accordance with the terms applicable for US Federal Government officers or employees acting as part of their official duties; on a worldwide, perpetual, irrevocable, royalty-free basis to BMJ Publishing Group Ltd ("BMJ") its licensees and where the relevant Journal is co-owned by BMJ to the co-owners of the Journal, to publish the Work in this journal and any other BMJ products and to exploit all rights, as set out in our [licence](#).

The Submitting Author accepts and understands that any supply made under these terms is made by BMJ to the Submitting Author unless you are acting as an employee on behalf of your employer or a postgraduate student of an affiliated institution which is paying any applicable article publishing charge ("APC") for Open Access articles. Where the Submitting Author wishes to make the Work available on an Open Access basis (and intends to pay the relevant APC), the terms of reuse of such Open Access shall be governed by a Creative Commons licence – details of these licences and which [Creative Commons](#) licence will apply to this Work are set out in our licence referred to above.

Other than as permitted in any relevant BMJ Author's Self Archiving Policies, I confirm this Work has not been accepted for publication elsewhere, is not being considered for publication elsewhere and does not duplicate material already published. I confirm all authors consent to publication of this Work and authorise the granting of this licence.

## Immigration Status and Mortality: The Importance of Accounting for Loss to Follow-up

Manav V. Vyas<sup>1,2,3</sup>, Jiming Fang<sup>3</sup>, Peter C. Austin<sup>2,3</sup>, Andreas Laupacis<sup>2,3,4</sup> Matthew C.

Cheung<sup>2,3,5</sup>, Frank L. Silver<sup>1,3</sup> and Moira K. Kapral<sup>2,3,4</sup>

1. Division of Neurology, Department of Medicine, University of Toronto, Canada
2. Institute of Health Policy, Management and Evaluation, University of Toronto, Canada
3. ICES, Toronto, Canada
4. Division of General Internal Medicine, Department of Medicine, University of Toronto, Canada
5. Division of Haematology & Oncology, Department of Medicine, University of Toronto, Canada

Abstract count: 246 words

Running Title: Immigration, Emigration, and Mortality

Word count: 2,928 words (not including abstract, references, tables, and figures)

Character count of the title: 85 (with spaces)

Number of references: 39

Keywords: immigration, emigration, mortality, lost to follow-up, emigration.

Figures: 3

Tables: 2

### Corresponding author:

Manav V. Vyas, MBBS MSc FRCPC

Division of Neurology, Department of Medicine, University of Toronto

2075 Bayview Avenue, Toronto, ON M4N 3M5

Email: [manav.vyas@mail.utoronto.ca](mailto:manav.vyas@mail.utoronto.ca)

## ABSTRACT

**Introduction:** Previous studies report lower mortality rates in immigrants compared to host populations, although many immigrants return to their home regions closer to end of life. Little is known about the variation in the association between immigration status and all-cause mortality in different disease cohorts and about the impact of emigration on this association.

**Methods:** Using linked population-based data, we followed adults with first-ever diagnosis of ischemic stroke, cancer, or schizophrenia between 2002 and 2013 in Ontario, Canada from index event to death, lost to follow-up (emigration), or end of follow-up in 2018. For each disease cohort, we calculated adjusted hazard ratios (HR) of death in immigrants compared to long-term residents, adjusting for demographic characteristics and comorbidities, with and without censoring for those who were lost to follow-up. We calculated the ratio of two HRs and the respective confidence limits (CL) using bootstrapping methods.

**Results:** Immigrants were more likely to be lost to follow-up than long-term residents in all disease cohorts. Not accounting for this lost to follow-up moderately overestimated the variable magnitude of association between immigration status and mortality based on underlying disease: ischemic stroke (HR of death before vs. after accounting for censoring: 0.78 vs. 0.83, ratio = 0.95; 95% CL, 0.93-0.97), cancer (0.74 vs. 0.78, ratio = 0.96; 0.95-0.96), and schizophrenia (0.54 vs. 0.56, ratio = 0.97; 0.96-0.98).

**Conclusions:** The immigrant survival advantage varies by the disease studied, and it is modestly overestimated by not for the higher loss to follow-up in immigrants.

## ARTICLE SUMMARY

### Strengths and limitations of this study

- Immigrants to high-income countries are known to have lower mortality rates than host populations; however, the extent to which loss to follow-up (emigration) accounts for this immigrant health advantage is not well-understood.
- In this retrospective cohort study of patients with first ever diagnosis of ischemic stroke, cancer, or schizophrenia, we present evidence of an immigrant mortality advantage that varies by the disease studied.
- Immigrants had higher rates of lost to follow-up (emigration) compared to long-term residents, and not accounting for loss to follow-up modestly overestimated the immigrant health advantage in all disease cohorts.
- The administrative database definition of lost to follow-up used in this study does not definitively suggest return migration of immigrants.

## INTRODUCTION

In 2016, approximately 7.5 million immigrants were living in Canada, with nearly 3.8 million residing in Ontario and accounting for about 30% of total population of the most populous province in Canada [1]. Studies from high-income countries, including Canada, have shown that immigrants have lower mortality compared to host populations [2–4]. This immigrant health advantage has been observed not only for all-cause mortality, but also for cardiovascular mortality [5] and cancer mortality [6], and for the incidence of non-communicable chronic conditions such as cardiovascular disease [7], cancer [8] and schizophrenia [9].

This phenomenon has been termed the *healthy immigrant effect*, and is partly attributed to a selection bias whereby only those who are healthy and have human capital are able to migrate [10,11]. However, another potential explanation for the observed immigrant health advantage is a phenomenon termed the *salmon effect*, whereby immigrants return to their home countries when they are gravely ill [12]. Thus, they are lost to follow-up and not accounted for in studies that rely on the mortality statistics alone [13]. Previous work in both observational studies and randomized controlled trials has shown that unbalanced loss to follow-up in two comparison groups can lead to biased estimates of association [14,15]. Further, the variation in the immigrant health advantage in different chronic disease cohorts has been seldom reported.

The aim of this study was to use linked population-based data from Ontario, Canada to evaluate the association between immigration status and all-cause mortality after a new diagnosis of ischemic stroke, cancer or schizophrenia, and to quantify the loss to follow-up in immigrants and long-term residents and its influence on the association between immigration status and all-cause mortality in each disease cohort.

## METHODS

### Setting and population

1  
2  
3 We created three separate incident disease cohorts of ischemic stroke, primary cancer and  
4 schizophrenia using validated case definitions for incidence during an ascertainment period of  
5 April 1, 2002 to March 31, 2012 (e-table 1). We focused on these three diseases because they  
6 are chronic conditions associated with high morbidity that require regular health care system  
7 contact following the diagnosis. We identified patients with ischemic stroke using the Ontario  
8 Stroke Registry which is a province-wide registry that includes data on a random sample of  
9 consecutive patients seen at over 150 hospitals in Ontario [16]. Data collection for the registry  
10 was performed by chart abstractors with neurological expertise, with the final diagnosis and  
11 other data elements obtained through review of clinical and neuroimaging data. We identified  
12 patients with diagnosis of a primary malignant cancer from the Ontario Cancer Registry, a  
13 population-based registry, which is created by combining information from discharge and day  
14 surgery summaries, pathology reports with any mention of cancer, or records of patients referred  
15 to specialized institutions treating cancer patients in Ontario [17]. It captures approximately 95%  
16 of all cancer diagnoses in the province [17]. We identified patients with schizophrenia based on  
17 a validated algorithm whereby a diagnosis of schizophrenia was made if the patient had one or  
18 more hospital admissions and/or three or more outpatient visits with a diagnosis of  
19 schizophrenia or schizoaffective disorder [18].

20  
21  
22 Within each disease cohort, we excluded prevalent cases if they had a diagnosis of the specific  
23 disease prior to April 1, 2002. If patients had multiple cohort-defining events during the  
24 ascertainment period, only information at the time of the first cohort-defining event was recorded.  
25 We excluded patients who were younger than 18 years or older than 104 years at the time of the  
26 index event, those who resided in long-term care homes at the time of the index event, and  
27 those who resided in rural areas (population < 10,000) because most immigrants (> 95%) reside  
28 in large urban areas.



1  
2  
3 Using unique identifiers, we linked these cohorts to population-based data held securely at ICES  
4 (formerly known as Institute for Clinical Evaluative Sciences), Toronto. ICES is a prescribed  
5 entity under the Ministry of Health and Long-Term Care where Ontario's public health services  
6 data sets are stored, linked and used for research. We obtained information on neighbourhood-  
7 level income (in quintiles) based on the postal-code files, and on history of previous diagnosis of  
8 hypertension [19], diabetes [20], chronic obstructive pulmonary disease (COPD) [21], congestive  
9 heart failure (CHF) [22] and atrial fibrillation [23] using case definitions (e-table 1).  
10  
11  
12  
13  
14  
15  
16  
17

### 18 Exposure and outcomes

19  
20  
21 Our exposure of interest was immigration status obtained from the Ministry of Immigration,  
22 Refugee and Citizenship (IRCC) which collected information on all immigrants arriving in Ontario  
23 after 1985 (IRCC Permanent Resident Database). We classified individuals born outside of  
24 Canada who arrived in Ontario after 1985 as *immigrants*, and those born in Canada or those  
25 who were born outside of Canada but arrived before 1985 as *long-term residents*.  
26  
27  
28  
29  
30  
31

32 Our primary outcome was death from any cause, which was obtained from the death registry  
33 along with the date of death. We set the end date of follow-up as March 31, 2018.  
34  
35  
36

37 We determined each person's date of last contact with the health system by using administrative  
38 databases to identify any contact with health care system such as a visit to a doctor's office, refill  
39 of prescriptions (in those over 65 years), hospitalization or emergency visits, receipt of home  
40 care, or admission to a rehabilitation facility (e-table 2) until January 31, 2020. Those alive on  
41 March 31, 2018 (end date of follow-up) with last health system contact prior to this date were  
42 flagged as *lost to follow-up* at the date of last health system contact (e-Figure 1).  
43  
44  
45  
46  
47  
48  
49

### 50 Statistical analyses

51  
52  
53 Analyses were conducted separately in each disease cohort. We compared baseline  
54 characteristics between immigrants and long-term residents within each disease cohort using  
55  
56  
57  
58  
59  
60

1  
2  
3 the Chi-squared test for categorical variables and the Wilcoxon rank sum test for continuous  
4  
5 variables.  
6

7  
8 We used the time of the index diagnosis as time zero. We created unadjusted cumulative  
9  
10 incidence curves of death and loss to follow-up in immigrants and long-term residents,  
11  
12 separately. We developed multivariable cause-specific hazards models to estimate the adjusted  
13  
14 hazard ratio (HR) of loss to follow-up (emigration) in immigrants compared to long-term residents  
15  
16 accounting for death as a competing event, and adjusting for age, sex, neighbourhood-level  
17  
18 income, hypertension, diabetes, COPD, CHF and atrial fibrillation.  
19

20  
21 We then fit two multivariable Cox proportional hazards models to estimate the adjusted HR of  
22  
23 death in immigrants compared to long-term residents, adjusting for demographic information and  
24  
25 chronic conditions as before. In the first model we censored individuals only on March 31, 2018  
26  
27 (end date of follow-up). In the second model, we censored individuals on March 31, 2018, or at  
28  
29 the date of last health system contact (i.e. date of loss to follow-up).  
30

31  
32 We then calculated a ratio of the two adjusted HRs obtained from these two models and  
33  
34 calculated 95% confidence limits around this ratio using percentile-based bootstrapping methods  
35  
36 and 1000 bootstrap samples. If the confidence limits for the ratio include 1, it would suggest that  
37  
38 there is no statistical difference between the adjusted HRs obtained with and without accounting  
39  
40 for loss to follow-up. The direction and magnitude of the difference between two HRs can be  
41  
42 inferred based on the ratio, with values under 1 suggesting overestimation of the association  
43  
44 between immigration status and mortality when not accounting for loss to follow-up. We similarly  
45  
46 obtained adjusted HRs of death for each covariate in the multivariable models using two  
47  
48 separate models, with and without accounting for loss to follow-up. Using the methods described  
49  
50 above, we also evaluated whether the association between other covariates and mortality  
51  
52 changed after accounting for loss to follow-up. All analyses were conducted using SAS 9.4  
53  
54  
55  
56  
57  
58  
59  
60

1  
2  
3 Copyright © 2002-2012 by SAS Institute Inc., Cary, NC, USA. We did not involve patients or the  
4 public in the design, or conduct, or reporting, or dissemination plans of our research.  
5  
6

### 7 Sensitivity analyses

8  
9  
10 We re-defined the date of last health care system contact as the recorded date plus 180 days to  
11 account for patients who may not interact with health care system for up to 6 months. We re-  
12 calculated the adjusted hazard of death accounting for loss to follow-up for each disease cohort.  
13  
14 We chose a *lag-time* of 6 months because all patients in this study had a chronic condition that  
15 would typically require follow-up within this time frame.  
16  
17  
18  
19

20  
21 To evaluate how the association between immigration status and mortality would change if those  
22 lost to follow-up had returned to their country of origin when gravely ill (salmon effect) and had  
23 died, we re-calculated the adjusted hazard of death in immigrants compared to long-term  
24 residents in two hypothetical scenarios in which patients, irrespective of the immigration status,  
25 were considered to have died within 30 days and 1 year following their last recorded health  
26 system contact.  
27  
28  
29  
30  
31  
32  
33

## 34 **RESULTS**

35  
36  
37 The study sample included 24,557 patients with ischemic stroke, 310,529 patients with primary  
38 cancer and 54,691 patients with schizophrenia (Figure 1). A greater proportion of patients with  
39 schizophrenia were immigrants (17.4%) compared to those with ischemic stroke (8.5%) or  
40 cancer (8.4%) (Table 1). Irrespective of the underlying diagnosis, immigrants were younger at  
41 the time of the diagnosis and more likely to reside in a low-income neighbourhood compared to  
42 long-term residents (Table 1). Other characteristics of the study cohorts are shown in Table 1.  
43  
44  
45  
46  
47  
48  
49

50  
51 During a median follow-up of 7 years, 13 667 patients were lost to follow-up across three  
52 disease cohorts. A greater proportion of patients with schizophrenia were lost to follow-up than  
53 patients with ischemic stroke or cancer (Table 2). Immigrants were more likely than long-term  
54  
55  
56  
57  
58  
59  
60

1  
2  
3 residents to be lost to follow up in all disease cohorts (Table 2 and Figure 2); however, the  
4 magnitude of association was greater in patients with ischemic stroke (HR 2.87; 95% CI 2.38-  
5 3.44) and cancer (HR 3.07; 95% CI 2.91-3.23) than schizophrenia (HR 1.54; 95% CI 1.44-1.64)  
6 (e-Table 3).  
7  
8  
9

10  
11  
12 During 2.7 million person-years follow-up, 176 301 deaths were recorded across the three  
13 disease cohorts. The crude mortality rate was highest in patients with ischemic stroke (95.3 per  
14 1000-person-years) followed by cancer (76.8 per 1000-person-year) and schizophrenia (13.7  
15 per 1000-person years). In all three disease cohorts, the unadjusted hazard of mortality was  
16 lower in immigrants compared to long-term residents (Table 2 and Figure 2). This remained true  
17 even after accounting for baseline differences in age, socio-economic status and comorbidities,  
18 with an adjusted HR of death in immigrants compared to long-term residents of 0.78 [95% CI  
19 0.73-0.84] in patients with ischemic stroke, a HR of 0.74 (95% CI 0.73-0.76) in patients with  
20 cancer, and a HR of 0.54 (95% CI 0.50-0.59) in patients with schizophrenia (Table 2). The  
21 magnitude of the mortality advantage in immigrants compared to long-term residents attenuated  
22 after accounting for loss to follow-up, with adjusted HR of death in immigrants compared to long-  
23 term residents of 0.83 (95% CI 0.77-0.89) for ischemic stroke, 0.78 (95% CI 0.76-0.79) for  
24 cancer, and 0.56 (95% CI 0.51-0.61) for schizophrenia (Table 2).  
25  
26  
27  
28  
29  
30  
31  
32  
33  
34  
35  
36  
37  
38  
39

40 The ratio of two adjusted HRs obtained using models with and without accounting for loss to  
41 follow-up was 0.95 [95% confidence limits (CL), 0.93 to 0.97] for ischemic stroke, 0.96 (95% CL,  
42 0.95 to 0.96) for cancer and 0.97 (95% CL, 0.96 to 0.98) for schizophrenia, suggesting that not  
43 accounting for loss to follow-up overestimated the mortality advantage in immigrants in all  
44 cohorts (Figure 3). The effect of not accounting for loss to follow-up on the association between  
45 other covariates and mortality is shown in Figure 3.  
46  
47  
48  
49  
50  
51

## 52 Sensitivity analyses

53  
54  
55  
56  
57  
58  
59  
60

1  
2  
3 Using a lag-time of 6 months in determining the date of last health care system contact, to  
4 account for patients who may not interact with health care system, did not alter the association  
5 between immigration status and mortality for any disease cohort (e-table 3).  
6  
7  
8  
9

10 In hypothetical scenarios in which, irrespective of immigration status, patients lost to follow-up  
11 were considered to be dead at 30 days and 1 year, the healthy immigrant advantage was  
12 eliminated in patients with schizophrenia, and attenuated in patients with ischemic stroke and  
13 cancer (Table 2).  
14  
15  
16  
17  
18

## 19 **DISCUSSION**

20  
21  
22 In this study using linked population-based data on over 380,000 patients with a new diagnosis  
23 of ischemic stroke, cancer or schizophrenia, we demonstrated that immigrants have a survival  
24 advantage compared to long-term residents, and that immigrants are more likely to be lost to  
25 follow-up than long-term residents. Not accounting for loss to follow-up resulted in statistically  
26 different, but a modest overestimation of the immigrant health advantage. Both the magnitude of  
27 the mortality advantage (or healthy immigrant effect) and the loss to follow up (or salmon effect)  
28 varied based on the disease studied.  
29  
30  
31  
32  
33  
34  
35  
36

37 Our finding of lower mortality in immigrants compared to long-term residents with stroke, cancer  
38 and schizophrenia is consistent with previous studies, and is partly explained by the younger  
39 age and the lower comorbidity in immigrants at the time of the index event [6,24]. However, the  
40 effect persisted even in the adjusted analyses. Of note, immigrants with schizophrenia had the  
41 greatest mortality advantage compared to those with ischemic stroke or cancer. While certain  
42 immigrant subgroups such as refugees or asylum seekers may be at increased risk of poor  
43 mental health outcomes [25] and mortality [26], the magnitude of mortality advantage in  
44 immigrants with schizophrenia observed in our study is consistent with previous reports of lower  
45 suicide rates in immigrants compared to long-term residents across different ethnic groups in the  
46  
47  
48  
49  
50  
51  
52  
53  
54  
55  
56  
57  
58  
59  
60

1  
2  
3 US [27] and in Canadian youth [28]. The variation in the magnitude of this health advantage  
4 based on the disease is a novel contribution, and could be due to variation in incidence of these  
5 diseases between immigrants and long-term residents [7,29], or due to variation in disease-  
6 specific health care provision in immigrants compared to long-term residents [30,31]. Future  
7 studies will be required to thoroughly understand mechanisms for this observed heterogeneity.  
8  
9  
10  
11  
12

13  
14 We found a greater likelihood of loss to follow-up in immigrants compared to long-term residents  
15 in all disease cohorts, despite adjusting for known comorbidities and the competing risk of death.  
16 Because we were able to identify any health system contact of cohort participants using health  
17 administrative data, being lost to follow-up would mean that participant left the province. One  
18 explanation for this is that immigrants with chronic conditions with physical health care needs  
19 (especially ischemic stroke and cancer) may emigrate to their home countries to be closer to  
20 their family members [32]. Those with schizophrenia may be less likely to do so due to stigma  
21 related to mental health diagnoses in some countries of origin [33,34].  
22  
23  
24  
25  
26  
27  
28  
29  
30

31  
32 Because immigration status was directly related to the censoring event, out-migration, we found  
33 that accounting for loss to follow-up altered the magnitude of the association between  
34 immigration status and mortality. Thus, previous estimates of mortality advantage in immigrants  
35 that have relied on death statistics alone and did not account for lost to follow-up of immigrants  
36 may have overestimated the immigrant health advantage [4,13,35]. Accounting for loss to follow-  
37 up did not change the magnitude of association between mortality and other variables of interest  
38 included in the multivariable models, except for older age in the ischemic stroke and cancer  
39 cohorts. This suggests that studies using administrative health data to evaluate the association  
40 between other covariates (sex, income or comorbidities) and mortality could yield adequate  
41 results even if they fail to account for loss to follow-up.  
42  
43  
44  
45  
46  
47  
48  
49  
50  
51  
52

53  
54 Our study is strengthened by the use of comprehensive administrative databases that allowed  
55 us to identify loss of health system contact in three separate chronic disease cohorts. The  
56  
57

1  
2  
3 findings are likely to be generalizable to other jurisdictions with immigrant populations and to  
4 other disease conditions not included in this study, but the magnitude of bias may vary  
5 depending on the disease condition, health care jurisdiction, and immigrant-related variables  
6 (country of origin, time since immigration or immigration class).  
7  
8  
9  
10

11  
12 Some limitations merit discussion. First, we did not have information on factors such as physical  
13 activity [36] and smoking [37], both of which are associated with mortality, and we did not have  
14 information specific to each disease condition such as disease severity, disability, response to  
15 treatment, or palliative care status, all of which could influence mortality. Second, we assumed  
16 that loss of health system contact equated to patients leaving health care jurisdiction rather than  
17 reflecting an excellent recovery negating the need for ongoing medical management. However,  
18 the misclassification introduced by this assumption should not vary based on immigration status.  
19  
20 Third, we assumed that, at least in immigrants, loss to follow-up was likely to be due to  
21 emigration to their home countries rather than to other parts of Canada. A study from the IRCC  
22 found that only 9% of immigrants who landed in Ontario between 1991 and 2006 had moved to  
23 other provinces by 2006 [38]. Lastly, movement of individuals in and out of a health care  
24 jurisdiction is a dynamic process, and those who emigrate can return. If such individuals return  
25 after the end date of follow-up, they could be falsely censored at the date of their emigration.  
26  
27  
28  
29  
30  
31  
32  
33  
34  
35  
36  
37  
38  
39

40 This study demonstrated that inadequate handling of loss to follow-up can lead to biased  
41 estimation of immigrant health advantage as immigrant deaths may not be captured if  
42 immigrants return to their home region when gravely ill. Based on these findings, we recommend  
43 that future studies comparing mortality and other long-term outcomes in immigrants and non-  
44 immigrants carefully record loss to follow-up, quantify it, and account for it using appropriate  
45 methodology. When this information is not available, other measures could include use of  
46 updated postal code files during follow-up [39], measuring outcomes in short term or assuming  
47 specific rates of emigration based on previous reports. While the magnitude of the bias  
48  
49  
50  
51  
52  
53  
54  
55  
56  
57  
58  
59  
60

1  
2  
3 associated with not accounting for lost to follow-up is small, this study highlights the  
4  
5 heterogeneity in the healthy immigrant effect and salmon effect across different diseases, and  
6  
7 supports the need of future studies to explain the reasons for the observed heterogeneity.  
8  
9  
10  
11  
12  
13  
14  
15  
16  
17  
18  
19  
20  
21  
22  
23  
24  
25  
26  
27  
28  
29  
30  
31  
32  
33  
34  
35  
36  
37  
38  
39  
40  
41  
42  
43  
44  
45  
46  
47  
48  
49  
50  
51  
52  
53  
54  
55  
56  
57  
58  
59  
60

For peer review only



1  
2  
3 **Data sharing statement**– The data used in this study is held securely in coded form at ICES.

4  
5 Data sharing agreements prohibit ICES from making the dataset publicly available, but access  
6  
7 may be granted to those who meet prespecified criteria for confidential access. Please contact  
8  
9 corresponding author for details.  
10

11  
12 **Code availability** – Can be made available upon request to the corresponding author.  
13

14  
15 **Ethics approval** – This study was approved by Research Ethics Board at Sunnybrook Health  
16  
17 Sciences Centre, Canada.  
18

19  
20 **Patient and public involvement statement**

21  
22 Patients or the public WERE NOT involved in the design, or conduct, or reporting, or  
23  
24 dissemination plans of our research  
25

26  
27 **Disclaimer**

28  
29  
30 The study was supported by ICES (formerly the Institute for Clinical Evaluative Sciences), which  
31  
32 is supported by an annual grant from the Ontario Ministry of Health and Long-Term Care. Data  
33  
34 were made available with help from the Immigration, Refugees and Citizenship Canada. Parts of  
35  
36 this material are based on data and/or information compiled and provided by the Canadian  
37  
38 Institute for Health Information. The analyses, opinions, results and conclusions reported in this  
39  
40 article are those of the authors and are independent from the funding sources. No endorsement  
41  
42 by ICES, the Ontario Ministry of Health and Long-Term Care, Canadian Institute for Health  
43  
44 Information, or the Immigration, Refugees and Citizenship Canada is intended or should be  
45  
46 inferred.  
47  
48

49  
50 **Contributorship statement**

51  
52 MVV, JF, and MKK were involved in the concept and design. MVV, PA, JF were involved in data  
53  
54 acquisition, and analysis. FLS and MKK were involved in the primary data acquisition data for  
55  
56  
57

1  
2  
3 Ontario Stroke Registry. All authors were involved in developing the project and interpreting the  
4  
5 results. MVV was responsible for drafting the manuscript which was critically revised by  
6  
7 everyone. MKK supervised the study and is the guarantor.  
8  
9

## 10 **Funding**

11  
12 This study was funded from Heart and Stroke Foundation of Canada (HSFC GIA19-26333).  
13  
14 MKK and PCA hold Mid-Career Investigator Awards from the Heart and Stroke Foundation of  
15  
16 Canada. MKK holds the Lillian Love Chair in Women's Health from the University Health  
17  
18 Network/University of Toronto. MVV holds a Fellowship Award from the Canadian Institutes of  
19  
20 Health Research.  
21  
22  
23

24 **Competing interests** – none.  
25  
26  
27  
28  
29  
30  
31  
32  
33  
34  
35  
36  
37  
38  
39  
40  
41  
42  
43  
44  
45  
46  
47  
48  
49  
50  
51  
52  
53  
54  
55  
56  
57  
58  
59  
60

## References

- 1 Government of Canada SC. The Daily — Immigration and ethnocultural diversity: Key results from the 2016 Census. 2017. <http://www.statcan.gc.ca/daily-quotidien/171025/dq171025b-eng.htm> (accessed 26 Oct 2017).
- 2 Vang Z, Sigouin J, Flenon A, *et al*. The Healthy Immigrant Effect in Canada: A Systematic Review. *Population Change and Lifecourse Strategic Knowledge Cluster Discussion Paper Series/ Un Réseau stratégique de connaissances Changements de population et parcours de vie Document de travail* 2015;**3**. <http://ir.lib.uwo.ca/pclc/vol3/iss1/4>
- 3 Syse A, Dzamarija MT, Kumar BN, *et al*. An observational study of immigrant mortality differences in Norway by reason for migration, length of stay and characteristics of sending countries. *BMC Public Health* 2018;**18**:508. doi:10.1186/s12889-018-5435-4
- 4 Omariba DWR, Ng E, Vissandjée B. Differences between immigrants at various durations of residence and host population in all-cause mortality, Canada 1991-2006. *Population Studies* 2014;**68**:339–57. doi:10.1080/00324728.2014.915050
- 5 McKeigue PM, Marmot MG. Mortality from coronary heart disease in Asian communities in London. *BMJ* 1988;**297**:903. doi:10.1136/bmj.297.6653.903
- 6 Cheung MC, Earle CC, Fischer HD, *et al*. Impact of Immigration Status on Cancer Outcomes in Ontario, Canada. *J Oncol Pract* 2017;**13**:e602–12. doi:10.1200/JOP.2016.019497
- 7 Tu JV, Chu A, Donovan LR, *et al*. The Cardiovascular Health in Ambulatory Care Research Team (CANHEART). *Circulation: Cardiovascular Quality and Outcomes* 2015;**8**:204–12. doi:10.1161/CIRCOUTCOMES.114.001416
- 8 Paszat L, Sutradhar R, Liu Y, *et al*. Risk of colorectal cancer among immigrants to Ontario, Canada. *BMC Gastroenterol* 2017;**17**:85. doi:10.1186/s12876-017-0642-5
- 9 Anderson KK, Cheng J, Susser E, *et al*. Incidence of psychotic disorders among first-generation immigrants and refugees in Ontario. *CMAJ* 2015;**187**:E279–86. doi:10.1503/cmaj.141420
- 10 Marmot MG, Adelstein AM, Bulusu L. Lessons from the study of immigrant mortality. *Lancet* 1984;**1**:1455–7.
- 11 McDonald JT, Kennedy S. Insights into the 'healthy immigrant effect': health status and health service use of immigrants to Canada. *Social Science & Medicine (1982)* 2004;**59**:1613–27. doi:10.1016/j.socscimed.2004.02.004
- 12 Markides KS, Eschbach K. Aging, migration, and mortality: current status of research on the Hispanic paradox. *J Gerontol B Psychol Sci Soc Sci* 2005;**60 Spec No 2**:68–75. doi:10.1093/geronb/60.special\_issue\_2.s68
- 13 Khan AM, Urquia M, Kornas K, *et al*. Socioeconomic gradients in all-cause, premature and avoidable mortality among immigrants and long-term residents using linked death records in Ontario, Canada. *J Epidemiol Community Health* 2017;**71**:625–32. doi:10.1136/jech-2016-208525

- 14 Akl EA, Briel M, You JJ, *et al.* Potential impact on estimated treatment effects of information lost to follow-up in randomised controlled trials (LOST-IT): systematic review. *BMJ* 2012;**344**. doi:10.1136/bmj.e2809
- 15 Greenland S. Response and follow-up bias in cohort studies. *Am J Epidemiol* 1977;**106**:184–7. doi:10.1093/oxfordjournals.aje.a112451
- 16 Kapral MK, Hall RE, Silver FL, *et al.* Registry of the Canadian Stroke Network. Report on the 2004/05 Ontario Stroke Audit. <https://www.ices.on.ca/~media/Files/Atlases-Reports/2009/RCSN-report-on-2004-05-Ontario-stroke-audit/Full-report.ashx>
- 17 Hall S, Schulze K, Groome P, *et al.* Using cancer registry data for survival studies: the example of the Ontario Cancer Registry. *J Clin Epidemiol* 2006;**59**:67–76. doi:10.1016/j.jclinepi.2005.05.001
- 18 Kurdyak P, Lin E, Green D, *et al.* Validation of a Population-Based Algorithm to Detect Chronic Psychotic Illness. *Can J Psychiatry* 2015;**60**:362–8. doi:10.1177/070674371506000805
- 19 Tu K, Chen Z, Lipscombe LL. Prevalence and incidence of hypertension from 1995 to 2005: a population-based study. *CMAJ* 2008;**178**:1429–35. doi:10.1503/cmaj.071283
- 20 Hux JE, Ivis F, Flintoft V, *et al.* Diabetes in Ontario: determination of prevalence and incidence using a validated administrative data algorithm. *Diabetes Care* 2002;**25**:512–6.
- 21 Gershon AS, Wang C, Guan J, *et al.* Identifying individuals with physician diagnosed COPD in health administrative databases. *COPD* 2009;**6**:388–94.
- 22 Schultz SE, Rothwell DM, Chen Z, *et al.* Identifying cases of congestive heart failure from administrative data: a validation study using primary care patient records. *Chronic Dis Inj Can* 2013;**33**:160–6.
- 23 Tu K, Nieuwlaat R, Cheng SY, *et al.* Identifying Patients With Atrial Fibrillation in Administrative Data. *Canadian Journal of Cardiology* 2016;**32**:1561–5. doi:10.1016/j.cjca.2016.06.006
- 24 Saposnik G, Redelmeier DA, Lu H, *et al.* Risk of premature stroke in recent immigrants (PRESARIO) Population-based matched cohort study. *Neurology* 2010;**74**:451–7. doi:10.1212/WNL.0b013e3181cf6e9e
- 25 Berthold SM, Kong S, Mollica RF, *et al.* Comorbid mental and physical health and health access in Cambodian refugees in the US. *J Community Health* 2014;**39**:1045–52. doi:10.1007/s10900-014-9861-7
- 26 Hollander A-C. Social inequalities in mental health and mortality among refugees and other immigrants to Sweden – epidemiological studies of register data. *Glob Health Action* 2013;**6**. doi:10.3402/gha.v6i0.21059
- 27 Borges G, Orozco R, Rafful C, *et al.* Suicidality, ethnicity and immigration in the USA. *Psychol Med* 2012;**42**:1175–84. doi:10.1017/S0033291711002340

- 1  
2  
3 28 Saunders NR, Lebenbaum M, Stukel TA, *et al.* Suicide and self-harm trends in recent  
4 immigrant youth in Ontario, 1996-2012: a population-based longitudinal cohort study. *BMJ*  
5 *Open* 2017;**7**:e014863. doi:10.1136/bmjopen-2016-014863  
6
- 7 29 Singh GK, Hiatt RA. 072: Cancer Incidence, Mortality, and Health-Related Behaviors Among  
8 US Immigrants. *Am J Epidemiol* 2005;**161**:S18–S18.  
9 doi:10.1093/aje/161.Supplement\_1.S18c  
10
- 11 30 Yarnell CJ, Fu L, Manuel D, *et al.* Association Between Immigrant Status and End-of-Life  
12 Care in Ontario, Canada. *JAMA* 2017;**318**:1479–88. doi:10.1001/jama.2017.14418  
13
- 14 31 Chen A, Kazanjian A. 516: Ethnicity, Time in Canada and Pap Testing among Recent  
15 Immigrants to British Columbia, Canada. *Am J Epidemiol* 2005;**161**:S129–S129.  
16 doi:10.1093/aje/161.Supplement\_1.S129c  
17
- 18 32 Giraudo M, Bena A, Costa G. Migrant workers in Italy: an analysis of injury risk taking into  
19 account occupational characteristics and job tenure. *BMC public health* 2017;**17**:351.  
20 doi:10.1186/s12889-017-4240-9  
21
- 22 33 Saunders NR, Gill PJ, Holder L, *et al.* Use of the emergency department as a first point of  
23 contact for mental health care by immigrant youth in Canada: a population-based study.  
24 *CMAJ* 2018;**190**:E1183–91. doi:10.1503/cmaj.180277  
25
- 26 34 Derr AS. Mental Health Service Use Among Immigrants in the United States: A Systematic  
27 Review. *Psychiatr Serv* 2016;**67**:265–74. doi:10.1176/appi.ps.201500004  
28
- 29 35 Kennedy S, Kidd MP, McDonald JT, *et al.* The Healthy Immigrant Effect: Patterns and  
30 Evidence from Four Countries. *Int Migration & Integration* 2015;**16**:317–32.  
31 doi:10.1007/s12134-014-0340-x  
32
- 33 36 Murray CJ, Lopez AD. Global mortality, disability, and the contribution of risk factors: Global  
34 Burden of Disease Study. *Lancet* 1997;**349**:1436–42. doi:10.1016/S0140-6736(96)07495-8  
35
- 36 37 GBD 2015 Tobacco Collaborators. Smoking prevalence and attributable disease burden in  
37 195 countries and territories, 1990-2015: a systematic analysis from the Global Burden of  
38 Disease Study 2015. *Lancet* 2017;**389**:1885–906. doi:10.1016/S0140-6736(17)30819-X  
39
- 40 38 Interprovincial Mobility of Immigrants in Canada 2006-2011 - Canada.ca.  
41 [https://www.canada.ca/en/immigration-refugees-citizenship/corporate/reports-](https://www.canada.ca/en/immigration-refugees-citizenship/corporate/reports-statistics/research/interprovincial-mobility-immigrants-canada-2006-2011.html)  
42 [statistics/research/interprovincial-mobility-immigrants-canada-2006-2011.html](https://www.canada.ca/en/immigration-refugees-citizenship/corporate/reports-statistics/research/interprovincial-mobility-immigrants-canada-2006-2011.html) (accessed 2  
43 Mar 2020).  
44
- 45 39 Youens D, Preen DB, Harris MN, *et al.* The importance of historical residential address  
46 information in longitudinal studies using administrative health data. *Int J Epidemiol*  
47 2018;**47**:69–80. doi:10.1093/ije/dyx156  
48  
49  
50  
51  
52  
53  
54  
55  
56  
57  
58  
59

1  
2  
3 **Figure 1.** Cohort selection and follow-up.  
4

5 Footnote: values in parenthesis represent proportion.  
6  
7  
8  
9  
10  
11  
12  
13  
14  
15  
16  
17  
18  
19  
20  
21  
22  
23  
24  
25  
26  
27  
28  
29  
30  
31  
32  
33  
34  
35  
36  
37  
38  
39  
40  
41  
42  
43  
44  
45  
46  
47  
48  
49  
50  
51  
52  
53  
54  
55  
56  
57  
58  
59  
60

For peer review only

**Table 1.** Baseline characteristics and mortality rate in immigrants and long-term residents with a first-ever diagnosis of ischemic stroke, cancer or schizophrenia between 2002 and 2012 in Ontario, Canada.

|                                     | Ischemic stroke |                     | Cancer        |                     | Schizophrenia |                     |
|-------------------------------------|-----------------|---------------------|---------------|---------------------|---------------|---------------------|
|                                     | Immigrants      | Long-term residents | Immigrants    | Long-term residents | Immigrants    | Long-term residents |
|                                     | 2078 (8.5)      | 22 479 (91.5)       | 26 084 (8.4)  | 284 445 (91.6)      | 9525 (17.4)   | 45 166 (82.6)       |
| Female, n (%)                       | 982 (47.3)      | 10 697 (47.6)       | 13 602 (52.1) | 130 324 (45.8)      | 4346 (45.6)   | 19 943 (44.2)       |
| Median age in years at index event  | 68 (55-78)      | 74 (63-82)          | 58 (48-70)    | 67 (58-76)          | 34 (25-45)    | 40 (26-53)          |
| Neighbourhood-level income, n (%)   |                 |                     |               |                     |               |                     |
| Lowest quintile (1 <sup>st</sup> )  | 668 (32.1)      | 5043 (22.4)         | 7041 (27.0)   | 50 044 (17.6)       | 3803 (39.9)   | 13 525 (29.9)       |
| Highest quintile (5 <sup>th</sup> ) | 201 (9.7)       | 4330 (19.3)         | 3326 (12.8)   | 62 667 (22.0)       | 734 (7.7)     | 6434 (14.2)         |
| Hypertension, n (%)                 | 1420 (68.3)     | 16 046 (71.4)       | 11 120 (42.6) | 152 177 (53.5)      | 1165 (12.2)   | 8253 (18.3)         |
| Diabetes, n (%)                     | 727 (35.0)      | 6495 (28.9)         | 4850 (18.6)   | 53 444 (18.8)       | 737 (7.7)     | 4178 (9.3)          |
| Congestive heart failure, n (%)     | 258 (12.4)      | 3728 (16.6)         | 878 (3.4)     | 20721 (7.3)         | 59 (0.6)      | 807 (1.8)           |
| COPD, n (%)                         | 111 (5.3)       | 2547 (11.3)         | 1023 (3.9)    | 31 745 (11.2)       | 60 (0.6)      | 1494 (3.3)          |
| Atrial fibrillation, n (%)          | 243 (11.7)      | 3786 (16.8)         | 777 (3.0)     | 19 278 (6.8)        | 34 (0.4)      | 525 (1.2)           |

3 Parenthesis represent 1<sup>st</sup> and 3<sup>rd</sup> quartile for continuous variables; whereas it represents the proportion of total for count variables, COPD – chronic obstructive  
4 pulmonary disease.

**Table 2.** Lost to follow-up and mortality in immigrants and long-term residents with and without accounting for loss to follow-up.

|                                                                                           | Ischemic stroke  |                     | Cancer           |                     | Schizophrenia    |                     |
|-------------------------------------------------------------------------------------------|------------------|---------------------|------------------|---------------------|------------------|---------------------|
|                                                                                           | Immigrants       | Long-term residents | Immigrants       | Long-term residents | Immigrants       | Long-term residents |
|                                                                                           | 2078 (8.5)       | 22 479 (91.5)       | 26 084 (8.4)     | 284 445 (91.6)      | 9525 (17.4)      | 45 166 (82.6)       |
| Loss to follow-up, n (%)                                                                  | 158 (7.6)        | 512 (2.3)           | 2016 (7.7)       | 5995 (2.1)          | 1238 (13.0)      | 3748 (8.3)          |
| Adjusted HR of lost to follow-up<br>(95% CI) <sup>a</sup> with competing risk of<br>death | 2.87 (2.38-3.44) | 1.00                | 3.07 (2.91-3.23) | 1.00                | 1.54 (1.44-1.64) | 1.00                |
| Death, n (%)                                                                              | 796 (35.4)       | 12 575 (55.9)       | 9014 (34.6)      | 146 723 (51.6)      | 546 (5.7)        | 6647 (14.7)         |
| Unadjusted HR (95 %CI)                                                                    | 0.61 (0.56-0.65) | 1.00                | 0.60 (0.59-0.62) | 1.00                | 0.39 (0.35-0.42) | 1.00                |
| Adjusted HR <sup>a</sup> (95% CI) not<br>accounting for loss to follow-up                 | 0.78 (0.73-0.84) | 1.00                | 0.74 (0.73-0.76) | 1.00                | 0.54 (0.50-0.59) | 1.00                |
| Adjusted HR <sup>a</sup> (95% CI) accounting<br>for loss to follow-up <sup>b</sup>        | 0.83 (0.77-0.89) | 1.00                | 0.78 (0.76-0.79) | 1.00                | 0.56 (0.51-0.61) | 1.00                |
| Sensitivity analyses <sup>c</sup>                                                         |                  |                     |                  |                     |                  |                     |



1  
2  
3  
4  
5  
6  
7  
8  
9  
10  
11  
12  
13  
14  
15  
16  
17  
18  
19  
20  
21  
22  
23  
24  
25  
26  
27  
28  
29  
30  
31  
32  
33  
34  
35  
36  
37  
38  
39  
40  
41  
42  
43  
44  
45  
46  
47

Death within 30 days of loss of  
follow-up

Adjusted HR (95% CI)                    0.93 (0.87-1.00)                    1.00    0.90 (0.88-0.91)                    1.00    1.00 (0.95-1.05)                    1.00

Death within 1 year of loss of  
follow-up

Adjusted HR (95% CI)                    0.93 (0.87-0.99)                    1.00    0.89 (0.87-0.91)                    1.00    1.00 (0.95-1.06)                    1.00

<sup>a</sup>Multivariable adjusted model adjusted for the following: age, sex, neighbourhood-level income, and comorbidities (known hypertension, diabetes, congestive heart failure, chronic obstructive pulmonary disease, and atrial fibrillation); <sup>b</sup>censoring those who were lost to follow-up, which was determined when date of last health system contact occurred before end of follow-up among those alive; <sup>c</sup>assigning date of death among those lost to follow-up and re-calculating adjusted hazard of death. Abbreviations: HR – hazard ratio, CI – confidence interval.

For peer review only

1  
2  
3 1  
4  
5  
6 2 **Figure 2.** Cumulative incidence curves in immigrants (red) and long-term residents  
7 3 (blue) showing probability of death (left hand figures) and of loss to follow-up (right hand  
8 4 figures) in patients with ischemic stroke (top), primary cancer (middle) and schizophrenia  
9 5 (bottom).  
10  
11  
12  
13  
14  
15  
16  
17  
18  
19  
20  
21  
22  
23  
24  
25  
26  
27  
28  
29  
30  
31  
32  
33  
34  
35  
36  
37  
38  
39  
40  
41  
42  
43  
44  
45  
46  
47  
48  
49  
50  
51  
52  
53  
54  
55  
56  
57  
58  
59  
60

For peer review only

1  
2  
3 1 **Figure 3.** Ratios of adjusted hazard ratios of death obtained using two multivariable cox-regression models with and  
4 2 without accounting for loss to follow-up. Each box represents point estimate of this ratio, and the error bars represent 95%  
5 3 confidence limits. Values less than 1 suggest overestimation of the magnitude of association when loss to follow-up is not  
6 4 accounted for.

7  
8  
9 5 Footnote: Immigrants are compared to long-term residents; age less than 55 years is the comparison group; and the 5<sup>th</sup> quintile of income represent the HR of  
10 6 death in the highest quintile compared to lowest quintile based on neighbourhood-level income.

11  
12  
13  
14  
15  
16  
17  
18  
19  
20  
21  
22  
23  
24  
25  
26  
27  
28  
29  
30  
31  
32  
33  
34  
35  
36  
37  
38  
39  
40  
41  
42  
43  
44  
45  
46  
47

For peer review only

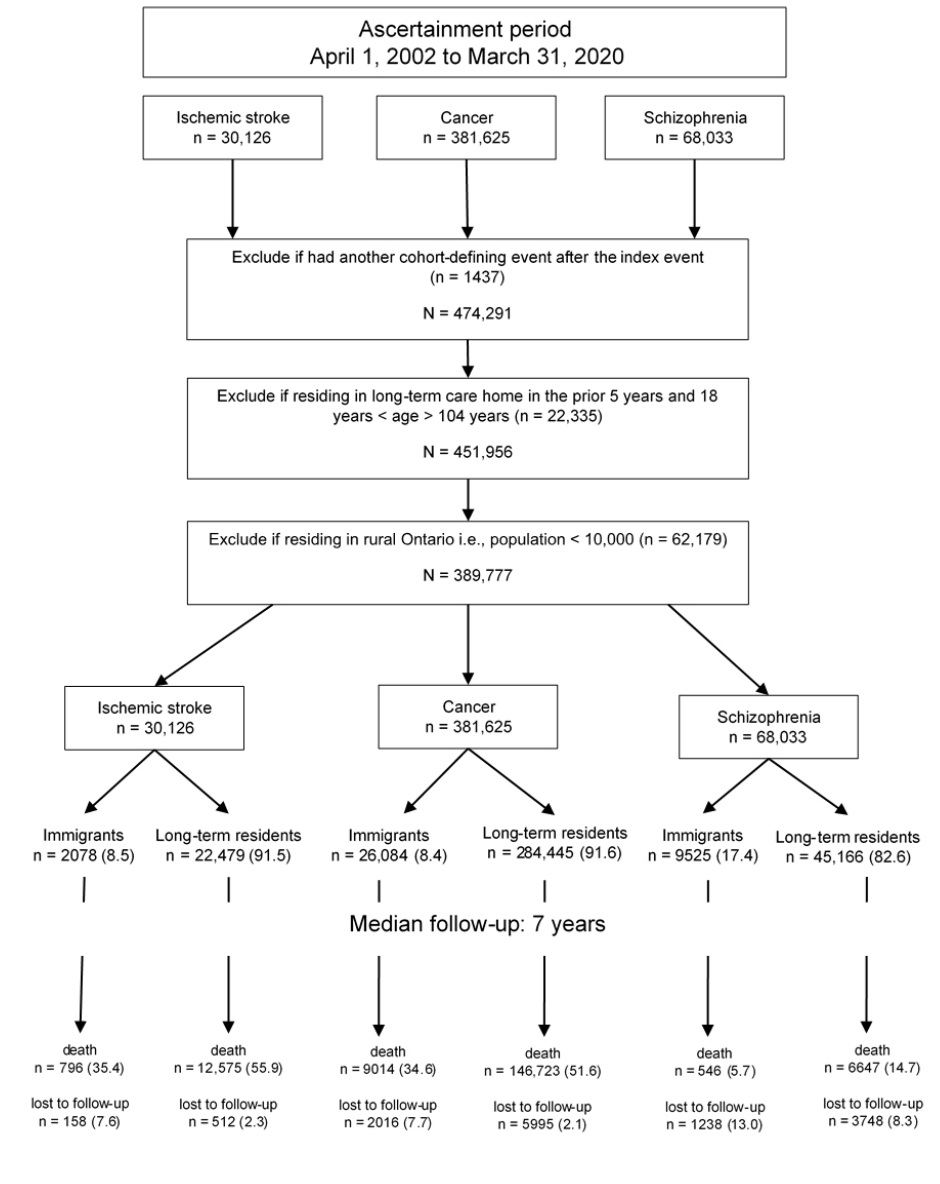

Figure 1

162x206mm (144 x 144 DPI)

1  
2  
3  
4  
5  
6  
7  
8  
9  
10  
11  
12  
13  
14  
15  
16  
17  
18  
19  
20  
21  
22  
23  
24  
25  
26  
27  
28  
29  
30  
31  
32  
33  
34  
35  
36  
37  
38  
39  
40  
41  
42  
43  
44  
45  
46  
47  
48  
49  
50  
51  
52  
53  
54  
55  
56  
57  
58  
59  
60

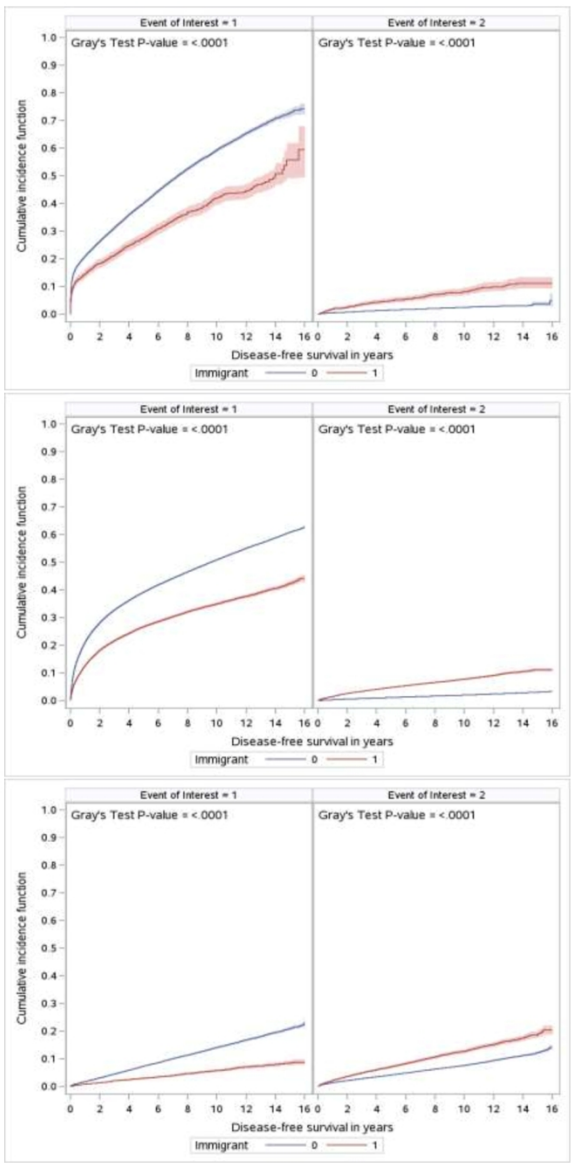

Figure 2

1  
2  
3  
4  
5  
6  
7  
8  
9  
10  
11  
12  
13  
14  
15  
16  
17  
18  
19  
20  
21  
22  
23  
24  
25  
26  
27  
28  
29  
30  
31  
32  
33  
34  
35  
36  
37  
38  
39  
40  
41  
42  
43  
44  
45  
46  
47  
48  
49  
50  
51  
52  
53  
54  
55  
56  
57  
58  
59  
60

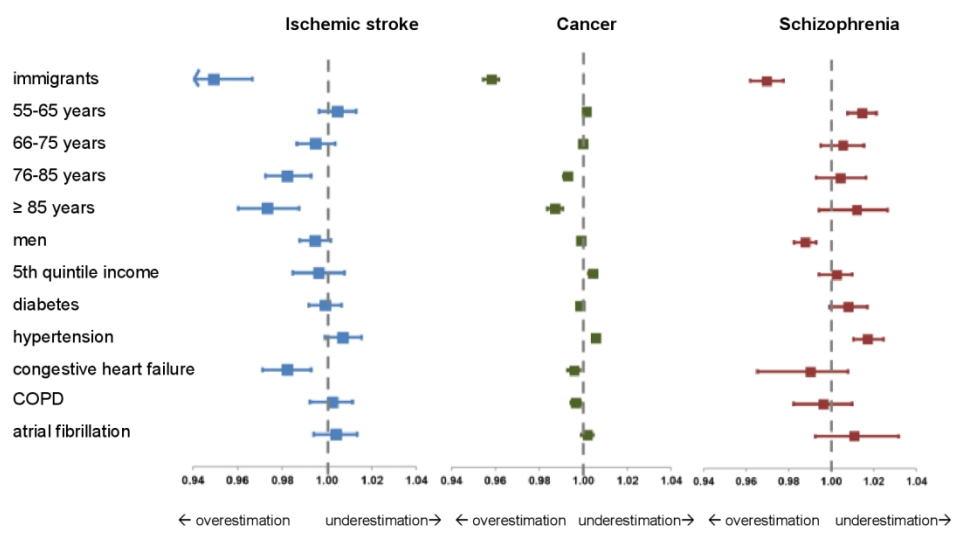

Figure 3

## Appendix

**e-table 1.** Definitions of variables included in the study.

**e-table 2.** Administrative databases used to determine date of last health system contact and statistics on contact with health care system in Ontario.

**e-table 3.** Results of sensitivity analyses using a lag-time of 6 months when determining the date of last health system contact.

**e-figure 1.** Hypothetical cases to illustrate loss to follow-up using administrative database. Subject A was not to lost to follow-up, Subject B would be considered lost to follow-up, and Subject C had the event of interest (death) and so is not considered lost to follow-up.

**e-table 1.** Definitions of variables included in the study.

| Variable                 | Definition                                                                                                                                                                                                                                                                                                                                                                                                                                                                          |
|--------------------------|-------------------------------------------------------------------------------------------------------------------------------------------------------------------------------------------------------------------------------------------------------------------------------------------------------------------------------------------------------------------------------------------------------------------------------------------------------------------------------------|
| Incident ischemic stroke | Hospitalized or non-hospitalized adult patients (i.e., outpatient/ER) with confirmed acute ischemic stroke between April 1, 2002 and March 31, 2013 seen at 150 participating hospitals – regional and non-regional stroke centres. Information gathered using chart abstractors with neurological expertise, with the final diagnosis and other data elements obtained through review of clinical and neuroimaging data.                                                           |
| Incident primary cancer  | A diagnosis of cancer either in hospitalized or non-hospitalized adult patients obtained from 4 different sources: hospital or ER visit using appropriate ICD codes, pathology reports with a diagnosis of cancer, regional cancer centres where patients with cancer are seen, and death certificates.                                                                                                                                                                             |
| Incident schizophrenia   | <p>primary diagnosis of schizophrenia or schizoaffective disorder from a general hospital bed (prior to 2002, ICD9 - 295; as of 2002 ICD10 - F20 or F25)</p> <p><b>OR</b></p> <p>primary diagnosis of schizophrenia from a psychiatric hospital bed (DSM-IV – 295.x)</p> <p><b>OR</b></p> <p>three outpatient visits with a diagnosis of schizophrenia (295 or F20/F25) from outpatient physician billings within a 3-year period.</p> <p>93.1% Sensitivity - 58.7% Specificity</p> |
| Hypertension             | <p>≥ 1 Hospitalization</p> <p><b>OR</b></p>                                                                                                                                                                                                                                                                                                                                                                                                                                         |



|                                              |                                                                                                                                                                                                                                               |
|----------------------------------------------|-----------------------------------------------------------------------------------------------------------------------------------------------------------------------------------------------------------------------------------------------|
|                                              | <p>≥ 2 physician claims in a two-year period</p> <p><b>OR</b></p> <p>1 physician claim followed by another physician claim or hospitalization within two years.</p> <p>72% Sensitivity - 95% Specificity - 87% PPV - 88% NPV</p>              |
| Diabetes                                     | <p>≥ 3 physician diagnostic code (250) in a one-year period</p> <p>79.9% Sensitivity - 99.1% Specificity - 91.4% PPV</p>                                                                                                                      |
| CHF (congestive heart failure)               | <p>≥ 1 Hospitalization</p> <p><b>OR</b></p> <p>1 physician claim in ER or clinic, followed by ≥ 1 Hospitalization, ER visit, or physician claim within one year.</p> <p>84.8% Sensitivity - 97.0% Specificity - 55.6% PPV</p>                 |
| Atrial fibrillation                          | <p>1 hospitalization (CIHI-DAD) or 1 emergency room visit (NACRS/SDS), ICD-10 (2002 onwards) – I48; ICD-9 (pre-2002) – 427.31 or 427.32</p> <p><b>OR</b></p> <p>cardioversion (without physician billing codes) – using Billing code Z437</p> |
| COPD (chronic obstructive pulmonary disease) | <p>≥1 Hospitalization for COPD</p> <p><b>OR</b></p> <p>≥ 3 physician claims in a two-year period</p> <p>57.5% Sensitivity - 95.4% Specificity</p>                                                                                             |

**e-table 2.** Administrative databases used to determine date of last health system contact and statistics on contact with health care system in Ontario.

Updated every quarterly in a year

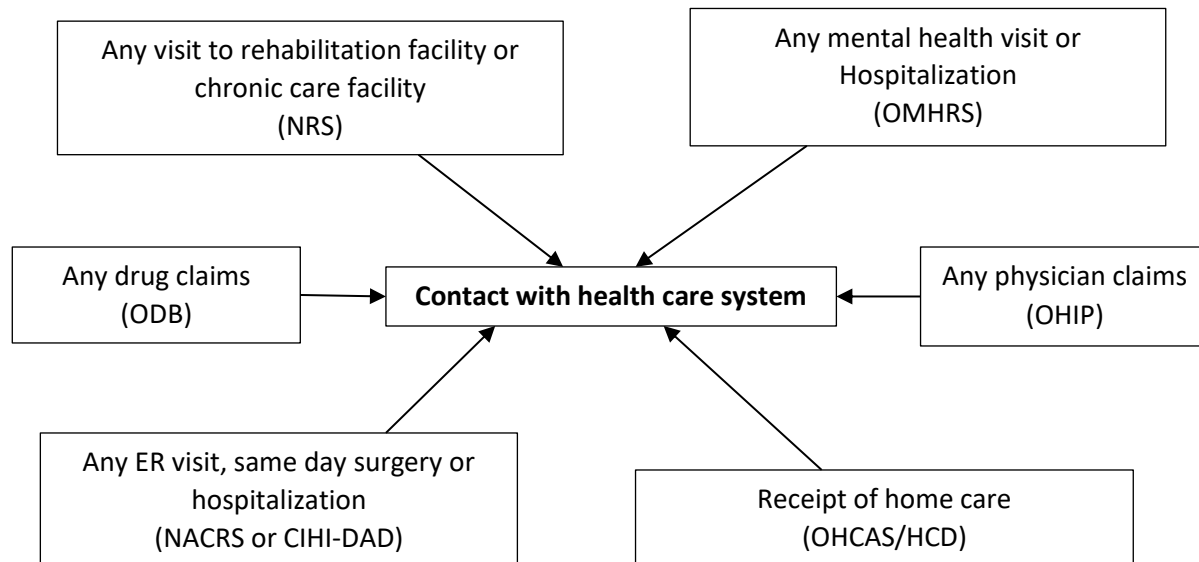

**Abbreviations:**

NRS – National Rehabilitation Reporting System; ODB – Ontario Drug Benefit; NACRS – National Ambulatory Care Reporting System; CIHI-DAD – Canadian Institute for Health Information-Discharge Abstract Database; OHCAS – Ontario Home Care Administration System; HCD – Home Care Database; OHIP – Ontario Health Insurance Plan Claims Database; OMHRS – Ontario Mental Health Reporting System

**% of eligible people with some health care contact in 2015**

|        | Age in years (grouped) |       |       |       |      |
|--------|------------------------|-------|-------|-------|------|
| Sex    | 0-19                   | 20-35 | 36-65 | 66-84 | ≥ 85 |
| Male   | 85%                    | 69%   | 80%   | 95%   | 94%  |
| Female | 86%                    | 85%   | 88%   | 96%   | 96%  |

**e-table 3.** Results of sensitivity analyses using a lag-time of 6 months when determining the date of last health system contact.

|                                |                                    | <b>Ischemic stroke</b> | <b>Cancer</b>    | <b>Schizophrenia</b> |
|--------------------------------|------------------------------------|------------------------|------------------|----------------------|
| Immigrants                     | loss of follow-up, n (%)           | 145 (7.0)              | 1895 (7.3)       | 1120 (11.8)          |
| Long-term residents            |                                    | 472 (2.1)              | 5472 (1.9)       | 3333 (7.4)           |
| Immigrants                     | death, n (%)                       | 796 (35.4)             | 9014 (34.6)      | 546 (5.7)            |
| Long-term residents            |                                    | 12,575 (55.9)          | 146,723 (51.6)   | 6647 (14.7)          |
| Adjusted HR of death (95% CI)^ | Immigrants vs. long-term residents | 0.82 (0.77-0.89)       | 0.77 (0.76-0.79) | 0.56 (0.51-0.61)     |

^accounting for loss of follow-up by censoring them.

**e-figure 1.** Hypothetical cases to illustrate loss to follow-up using administrative database. Subject A was not lost to follow-up, Subject B would be considered lost to follow-up, and Subject C had the event of interest (death) and so is not considered lost to follow-up.

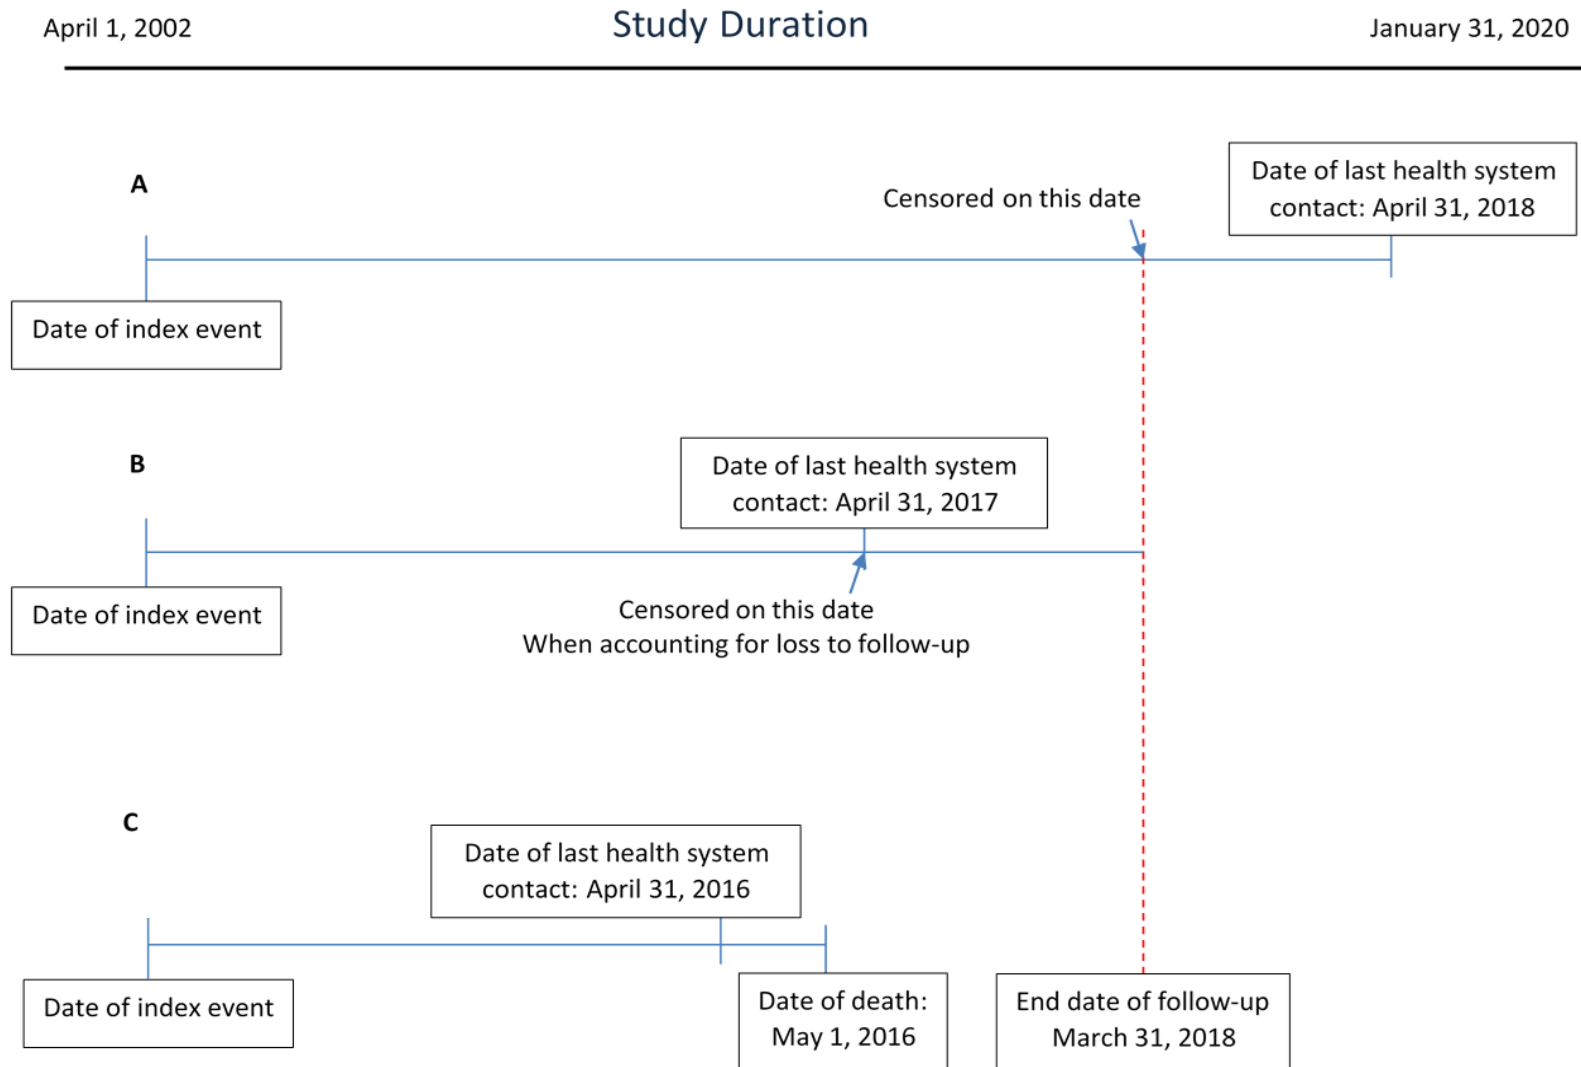

STROBE Statement—Checklist of items that should be included in reports of *cohort studies*

|                           | Item No | Recommendation                                                                                                                                                                                    | Location             |
|---------------------------|---------|---------------------------------------------------------------------------------------------------------------------------------------------------------------------------------------------------|----------------------|
| <b>Title and abstract</b> | 1       | (a) Indicate the study's design with a commonly used term in the title or the abstract                                                                                                            | Page 2               |
|                           |         | (b) Provide in the abstract an informative and balanced summary of what was done and what was found                                                                                               | Page 2               |
| <b>Introduction</b>       |         |                                                                                                                                                                                                   |                      |
| Background/rationale      | 2       | Explain the scientific background and rationale for the investigation being reported                                                                                                              | Page 4               |
| Objectives                | 3       | State specific objectives, including any prespecified hypotheses                                                                                                                                  | Page 4               |
| <b>Methods</b>            |         |                                                                                                                                                                                                   |                      |
| Study design              | 4       | Present key elements of study design early in the paper                                                                                                                                           | Page 5               |
| Setting                   | 5       | Describe the setting, locations, and relevant dates, including periods of recruitment, exposure, follow-up, and data collection                                                                   | Page 5               |
| Participants              | 6       | (a) Give the eligibility criteria, and the sources and methods of selection of participants. Describe methods of follow-up                                                                        | Page 5 and e-table 2 |
|                           |         | (b) For matched studies, give matching criteria and number of exposed and unexposed                                                                                                               | n.a.                 |
| Variables                 | 7       | Clearly define all outcomes, exposures, predictors, potential confounders, and effect modifiers. Give diagnostic criteria, if applicable                                                          | Page 5 and e-table 1 |
| Data sources/ measurement | 8*      | For each variable of interest, give sources of data and details of methods of assessment (measurement). Describe comparability of assessment methods if there is more than one group              | Page 5 and e-table 1 |
| Bias                      | 9       | Describe any efforts to address potential sources of bias                                                                                                                                         | Page 6               |
| Study size                | 10      | Explain how the study size was arrived at                                                                                                                                                         | Figure 1             |
| Quantitative variables    | 11      | Explain how quantitative variables were handled in the analyses. If applicable, describe which groupings were chosen and why                                                                      | Table 1              |
| Statistical methods       | 12      | (a) Describe all statistical methods, including those used to control for confounding                                                                                                             | Page 6-7             |
|                           |         | (b) Describe any methods used to examine subgroups and interactions                                                                                                                               | Page 6-7             |
|                           |         | (c) Explain how missing data were addressed                                                                                                                                                       | None present         |
|                           |         | (d) If applicable, explain how loss to follow-up was addressed                                                                                                                                    | e-table 2 and page 7 |
|                           |         | (e) Describe any sensitivity analyses                                                                                                                                                             | Page 8               |
| <b>Results</b>            |         |                                                                                                                                                                                                   |                      |
| Participants              | 13*     | (a) Report numbers of individuals at each stage of study—eg numbers potentially eligible, examined for eligibility, confirmed eligible, included in the study, completing follow-up, and analysed | Figure 1             |
|                           |         | (b) Give reasons for non-participation at each stage                                                                                                                                              | Figure 1             |

|                          |     |                                                                                                                                                                                                              |                        |
|--------------------------|-----|--------------------------------------------------------------------------------------------------------------------------------------------------------------------------------------------------------------|------------------------|
|                          |     | (c) Consider use of a flow diagram                                                                                                                                                                           | Figure 1               |
| Descriptive data         | 14* | (a) Give characteristics of study participants (eg demographic, clinical, social) and information on exposures and potential confounders                                                                     | Table 1                |
|                          |     | (b) Indicate number of participants with missing data for each variable of interest                                                                                                                          | None with missing data |
|                          |     | (c) Summarise follow-up time (eg, average and total amount)                                                                                                                                                  | Page 8                 |
| Outcome data             | 15* | Report numbers of outcome events or summary measures over time                                                                                                                                               | Page 9 and Table 2     |
| Main results             | 16  | (a) Give unadjusted estimates and, if applicable, confounder-adjusted estimates and their precision (eg, 95% confidence interval). Make clear which confounders were adjusted for and why they were included | Page 9, and table 2    |
|                          |     | (b) Report category boundaries when continuous variables were categorized                                                                                                                                    | Table 2                |
|                          |     | (c) If relevant, consider translating estimates of relative risk into absolute risk for a meaningful time period                                                                                             | n.a.                   |
| Other analyses           | 17  | Report other analyses done—eg analyses of subgroups and interactions, and sensitivity analyses                                                                                                               | Figure 3               |
| <b>Discussion</b>        |     |                                                                                                                                                                                                              |                        |
| Key results              | 18  | Summarise key results with reference to study objectives                                                                                                                                                     | Page 10                |
| Limitations              | 19  | Discuss limitations of the study, taking into account sources of potential bias or imprecision. Discuss both direction and magnitude of any potential bias                                                   | Page 12                |
| Interpretation           | 20  | Give a cautious overall interpretation of results considering objectives, limitations, multiplicity of analyses, results from similar studies, and other relevant evidence                                   | Page 10                |
| Generalisability         | 21  | Discuss the generalisability (external validity) of the study results                                                                                                                                        | Page 12                |
| <b>Other information</b> |     |                                                                                                                                                                                                              |                        |
| Funding                  | 22  | Give the source of funding and the role of the funders for the present study and, if applicable, for the original study on which the present article is based                                                | Page 15                |

\*Give information separately for exposed and unexposed groups.

**Note:** An Explanation and Elaboration article discusses each checklist item and gives methodological background and published examples of transparent reporting. The STROBE checklist is best used in conjunction with this article (freely available on the Web sites of PLoS Medicine at <http://www.plosmedicine.org/>, Annals of Internal Medicine at <http://www.annals.org/>, and Epidemiology at <http://www.epidem.com/>). Information on the STROBE Initiative is available at <http://www.strobe-statement.org>.

# BMJ Open

## Immigration Status and Mortality: The Importance of Accounting for Loss to Follow-up

|                                 |                                                                                                                                                                                                                                                                                                                                                                                                                                                                              |
|---------------------------------|------------------------------------------------------------------------------------------------------------------------------------------------------------------------------------------------------------------------------------------------------------------------------------------------------------------------------------------------------------------------------------------------------------------------------------------------------------------------------|
| Journal:                        | <i>BMJ Open</i>                                                                                                                                                                                                                                                                                                                                                                                                                                                              |
| Manuscript ID                   | bmjopen-2020-046377.R1                                                                                                                                                                                                                                                                                                                                                                                                                                                       |
| Article Type:                   | Original research                                                                                                                                                                                                                                                                                                                                                                                                                                                            |
| Date Submitted by the Author:   | 11-May-2021                                                                                                                                                                                                                                                                                                                                                                                                                                                                  |
| Complete List of Authors:       | Vyas, Manav; University of Toronto, Division of Neurology<br>Fang, Jiming; ICES<br>Austin, Peter; ICES<br>Laupacis, Andreas; University of Toronto, Department of Medicine<br>Cheung, Matthew; University of Toronto, Division of Haematology & Oncology, Department of Medicine<br>Silver, Frank ; University of Toronto, Division of Neurology, Department of Medicine<br>Kapral, MK; University of Toronto, Division of General Internal Medicine, Department of Medicine |
| <b>Primary Subject Heading</b>: | Epidemiology                                                                                                                                                                                                                                                                                                                                                                                                                                                                 |
| Secondary Subject Heading:      | Health services research                                                                                                                                                                                                                                                                                                                                                                                                                                                     |
| Keywords:                       | EPIDEMIOLOGY, SOCIAL MEDICINE, PUBLIC HEALTH                                                                                                                                                                                                                                                                                                                                                                                                                                 |
|                                 |                                                                                                                                                                                                                                                                                                                                                                                                                                                                              |

SCHOLARONE™  
Manuscripts



I, the Submitting Author has the right to grant and does grant on behalf of all authors of the Work (as defined in the below author licence), an exclusive licence and/or a non-exclusive licence for contributions from authors who are: i) UK Crown employees; ii) where BMJ has agreed a CC-BY licence shall apply, and/or iii) in accordance with the terms applicable for US Federal Government officers or employees acting as part of their official duties; on a worldwide, perpetual, irrevocable, royalty-free basis to BMJ Publishing Group Ltd ("BMJ") its licensees and where the relevant Journal is co-owned by BMJ to the co-owners of the Journal, to publish the Work in this journal and any other BMJ products and to exploit all rights, as set out in our [licence](#).

The Submitting Author accepts and understands that any supply made under these terms is made by BMJ to the Submitting Author unless you are acting as an employee on behalf of your employer or a postgraduate student of an affiliated institution which is paying any applicable article publishing charge ("APC") for Open Access articles. Where the Submitting Author wishes to make the Work available on an Open Access basis (and intends to pay the relevant APC), the terms of reuse of such Open Access shall be governed by a Creative Commons licence – details of these licences and which [Creative Commons](#) licence will apply to this Work are set out in our licence referred to above.

Other than as permitted in any relevant BMJ Author's Self Archiving Policies, I confirm this Work has not been accepted for publication elsewhere, is not being considered for publication elsewhere and does not duplicate material already published. I confirm all authors consent to publication of this Work and authorise the granting of this licence.



## Immigration Status and Mortality: The Importance of Accounting for Loss to Follow-up

Manav V. Vyas<sup>1,2,3</sup>, Jiming Fang<sup>3</sup>, Peter C. Austin<sup>2,3</sup>, Andreas Laupacis<sup>2,3,4</sup> Matthew C.

Cheung<sup>2,3,5</sup>, Frank L. Silver<sup>1,3</sup> and Moira K. Kapral<sup>2,3,4</sup>

1. Division of Neurology, Department of Medicine, University of Toronto, Canada
2. Institute of Health Policy, Management and Evaluation, University of Toronto, Canada
3. ICES, Toronto, Canada
4. Division of General Internal Medicine, Department of Medicine, University of Toronto, Canada
5. Division of Haematology & Oncology, Department of Medicine, University of Toronto, Canada

Abstract count: 248 words

Running Title: Immigration, Emigration, and Mortality

Word count: 3,360 words (not including abstract, references, tables, and figures)

Character count of the title: 85 (with spaces)

Number of references: 39

Keywords: immigration, emigration, mortality, lost to follow-up, emigration.

Figures: 3

Tables: 2

### Corresponding author:

Dr Manav V. Vyas, MBBS MSc PhD FRCPC

Staff Neurologist, St. Michael's Hospital

Assistant Professor, Department of Medicine, University of Toronto

Office: Li Ka Shing Knowledge Institute, Rm 628, 250 Yonge Street, Toronto, ON M5B 2L7

Email: manav.vyas@mail.utoronto.ca | Phone: 416-864-5056 | Fax: 416-864-5712

## ABSTRACT

**Objectives:** To evaluate the association between immigration status and all-cause mortality in different disease cohorts, and the impact of loss to follow-up on the observed associations.

**Design:** Population-based retrospective cohort study using linked administrative health data in Ontario, Canada.

**Setting:** We followed adults with a first-ever diagnosis of ischemic stroke, cancer, or schizophrenia between 2002 and 2013 from index event to death, loss to follow-up, or end of follow-up in 2018.

**Primary and secondary outcome measures:** Our outcomes of interest were all-cause mortality and loss to follow-up. For each disease cohort, we calculated adjusted hazard ratios (HR) of death in immigrants compared to long-term residents, adjusting for demographic characteristics and comorbidities, with and without censoring for those who were lost to follow-up. We calculated the ratio of two the HRs and the respective confidence limits (CL) using bootstrapping methods.

**Results:** Immigrants were more likely to be lost to follow-up than long-term residents in all disease cohorts. Not accounting for this loss to follow-up overestimated the magnitude of the association between immigration status and mortality in those with ischemic stroke (HR of death before vs. after accounting for censoring: 0.78 vs. 0.83, ratio = 0.95; 95% CL, 0.93-0.97), cancer (0.74 vs. 0.78, ratio = 0.96; 0.95-0.96), and schizophrenia (0.54 vs. 0.56, ratio = 0.97; 0.96-0.98).

**Conclusions:** Immigrants to Canada have a survival advantage that varies by the disease studied. The magnitude of this advantage is overestimated by not accounting for the higher loss to follow-up in immigrants.

## ARTICLE SUMMARY

### Strengths and limitations of this study

- Immigrants to high-income countries have lower mortality rates than host populations; however, the extent to which loss to follow-up (often due to emigration) accounts for this immigrant health advantage is not well-understood.
- In this retrospective cohort study of patients with a first ever diagnosis of ischemic stroke, cancer, or schizophrenia, we present evidence of an immigrant mortality advantage that varies by the disease studied.
- Loss to follow-up was higher in immigrants than long-term residents. Failure to account for this overestimated the immigrant health advantage in all disease cohorts.
- Our findings support the need to report, quantify, and account for loss to follow-up when evaluating long-term outcomes for a variety of health conditions.

## INTRODUCTION

Studies from high-income countries, including Canada, have shown that immigrants have a lower mortality compared to host populations [1–3]. This immigrant health advantage has been observed not only for all-cause mortality, but also for cardiovascular [4] and cancer mortality [5], and for the incidence of non-communicable chronic conditions such as cardiovascular disease [6], cancer [7] and schizophrenia [8].

This phenomenon has been termed the *healthy immigrant effect*, and is partly attributed to a selection bias whereby only those who are healthy and have human capital are able to migrate [9,10]. However, another potential explanation for the observed immigrant health advantage is a phenomenon termed the *salmon effect*, whereby immigrants return to their home countries when they are gravely ill [11]. Thus, they are lost to follow-up and not accounted for in studies that rely on mortality statistics that do not record emigration [12]. Such lack of complete follow-up was identified in a large-scale meta-analysis on immigrant mortality in which none of the included 96 studies accounted for loss to follow-up and only 29 (28%) studies identified loss to follow-up as an issue [13]. Previous work in both observational studies and randomized controlled trials has shown that unbalanced loss to follow-up in two comparison groups can lead to biased estimates of association [14,15].

The aims of this study were to use linked population-based data from Ontario, Canada to evaluate the association between immigration status and all-cause mortality after a new diagnosis of ischemic stroke, cancer or schizophrenia, to quantify loss to follow-up in immigrants compared to long-term residents, and to determine how accounting for loss to follow-up influences the association between immigration status and all-cause mortality in each disease cohort.

## METHODS

## Setting and population

Ontario is Canada's most populous province, with an estimated population of 14 million [16]. In 2016, approximately 3.8 million immigrants were living in Ontario, accounting for about 30% of the total population [17]. All residents of Ontario (except for undocumented migrants and those visiting) are covered by the provincial health plan that includes physician services, hospital and emergency care, and investigations ordered by physicians. The linked administrative databases in Ontario capture all health care system contacts of insured Ontario residents.

We created three separate incident disease cohorts of ischemic stroke, primary cancer and schizophrenia using validated case definitions for incidence during an ascertainment period of April 1, 2002 to March 31, 2012 (e-table 1). We focused on these three diseases because they are chronic conditions associated with high morbidity that require regular health care system contact (which is captured in administrative databases) following the diagnosis, and because management of these conditions may benefit from family and social supports, which can be a factor in emigration. We identified patients with ischemic stroke using the Ontario Stroke Registry which is a province-wide registry that includes data on a random sample of consecutive patients seen at over 150 hospitals in Ontario [18]. Data collection for the registry was performed by chart abstractors with neurological expertise, with the final diagnosis and other data elements obtained through review of clinical and neuroimaging data. We identified patients with a diagnosis of a primary malignant cancer from the Ontario Cancer Registry, a population-based registry, which is created by combining information from discharge and day surgery summaries, pathology reports with any mention of cancer, or records of patients referred to specialized institutions treating cancer patients in Ontario [19]. It captures approximately 95% of all cancer diagnoses in the province [19]. We identified patients with schizophrenia based on a validated algorithm whereby a diagnosis of schizophrenia was made if the patient had one or more

1  
2  
3 hospital admissions and/or three or more outpatient visits with a diagnosis of schizophrenia or  
4  
5 schizoaffective disorder [20].  
6

7  
8 Within each disease cohort, we excluded prevalent cases if they had a diagnosis of the specific  
9  
10 disease prior to April 1, 2002. If patients had multiple cohort-defining events during the  
11  
12 ascertainment period, only information at the time of the first cohort-defining event was recorded.  
13

14 We excluded patients who were younger than 18 years or older than 104 years at the time of the  
15  
16 index event, those who resided in long-term care homes at the time of the index event, and  
17  
18 those who resided in rural areas (population < 10,000) because most immigrants (> 95%) reside  
19  
20 in large urban areas.  
21

22  
23 Using unique identifiers, we linked these cohorts to population-based data held securely at ICES  
24  
25 (formerly known as the Institute for Clinical Evaluative Sciences), Toronto. ICES is a prescribed  
26  
27 entity under the Ministry of Health and Long-Term Care where Ontario's public health services  
28  
29 data sets are stored, linked and used for research. We obtained information on neighbourhood-  
30  
31 level income (in quintiles) based on the postal-code files, and on previous diagnoses of  
32  
33 hypertension [21], diabetes [22], chronic obstructive pulmonary disease (COPD) [23], congestive  
34  
35 heart failure (CHF) [24] and atrial fibrillation [25] using validated case definitions (e-table 1).  
36  
37

### 38 39 Exposure and outcomes 40

41 Our exposure of interest was immigration status obtained from the Ministry of Immigration,  
42  
43 Refugee and Citizenship (IRCC) Permanent Resident Database which collected information on  
44  
45 all immigrants who arrived in Ontario after 1985. As information on immigration status was only  
46  
47 available after 1985, we classified individuals born outside of Canada who arrived in Ontario  
48  
49 after 1985 as *immigrants*, and those born in Canada or those who were born outside of Canada  
50  
51 but arrived before 1985 as *long-term residents*.  
52  
53  
54  
55  
56  
57  
58  
59  
60

1  
2  
3 Our primary outcome was death from any cause, which was obtained from the death registry  
4 along with the date of death. We set the end date of follow-up as March 31, 2018.  
5  
6

7  
8 We determined each person's date of last contact with the health system by using administrative  
9 databases to identify any contact with health care system such as a visit to a doctor's office, refill  
10 of prescriptions (in those over 65 years), hospitalization or emergency visits, receipt of home  
11 care, or admission to a rehabilitation facility (e-table 2) until January 31, 2020, the latest date for  
12 which information from the administrative databases was available. The health care system  
13 contact could be for any reason, and not pertaining to the index diagnosis alone. Those who  
14 were not recorded as dying prior to March 31, 2018 (end date of follow-up), and who had their  
15 last health system contact prior to this date were flagged as *lost to follow-up* at the date of last  
16 health system contact (e-Figure 1).  
17  
18  
19  
20  
21  
22  
23  
24  
25  
26

## 27 Statistical analyses

28  
29  
30 Analyses were conducted separately in each disease cohort. We compared baseline  
31 characteristics between immigrants and long-term residents within each disease cohort using  
32 the Chi-squared test for categorical variables and the Wilcoxon rank sum test for continuous  
33 variables.  
34  
35  
36  
37  
38

39 We used the time of the index diagnosis as time zero. We estimated unadjusted cumulative  
40 incidence functions for death and loss to follow-up in immigrants and long-term residents,  
41 separately. We developed multivariable cause-specific hazards models to estimate the adjusted  
42 hazard ratio (HR) of loss to follow-up in immigrants compared to long-term residents accounting  
43 for death as a competing event, and adjusting for age, sex, neighbourhood-level income,  
44 hypertension, diabetes, COPD, CHF and atrial fibrillation.  
45  
46  
47  
48  
49  
50  
51

52 We then fit two multivariable Cox proportional hazards models to estimate the adjusted HR of  
53 death in immigrants compared to long-term residents, adjusting for demographic information and  
54  
55  
56  
57  
58  
59  
60

1  
2  
3 chronic conditions as before. In the first model, which did not account for loss to follow-up, we  
4 censored individuals only on March 31, 2018. In the second model, which accounted for loss to  
5 follow-up, we censored individuals on the first of either March 31, 2018, or the date of last health  
6 system contact.  
7  
8  
9  
10

11  
12 We then calculated a ratio of the two adjusted HRs obtained from these two models and  
13 calculated 95% confidence limits around this ratio using percentile-based bootstrapping methods  
14 and 1000 bootstrap samples. If the confidence limits for the ratio included 1, it would suggest  
15 that there is no statistical difference between the adjusted HRs obtained with and without  
16 accounting for loss to follow-up. The direction and magnitude of the difference between two HRs  
17 can be inferred based on the ratio, with values under 1 suggesting overestimation of the  
18 association between immigration status and mortality when not accounting for loss to follow-up.  
19 We similarly obtained adjusted HRs of death for each covariate in the multivariable models using  
20 two separate models, with and without accounting for loss to follow-up. Using the methods  
21 described above, we also evaluated whether the association between other covariates and  
22 mortality changed after accounting for loss to follow-up. All analyses were conducted using SAS  
23 9.4 Copyright © 2002-2012 by SAS Institute Inc., Cary, NC, USA. We did not involve patients or  
24 the public in the design, or conduct, or reporting, or dissemination plans of our research.  
25  
26  
27  
28  
29  
30  
31  
32  
33  
34  
35  
36  
37  
38  
39

#### 40 Sensitivity analyses

41  
42  
43 We re-defined the date of last health care system contact as the recorded date plus 180 days to  
44 account for patients who may not interact with health care system for up to 6 months (e-figure 2)  
45 and then re-calculated the adjusted hazard of death accounting for loss to follow-up for each  
46 disease cohort. We chose a *lag-time* of 6 months because all patients in this study had a chronic  
47 condition that would typically require follow-up within this time frame.  
48  
49  
50  
51  
52  
53  
54  
55  
56  
57  
58  
59  
60



1  
2  
3 To evaluate how the association between immigration status and mortality would change if those  
4 lost to follow-up had died, we re-calculated the adjusted hazard of death in immigrants  
5 compared to long-term residents in two hypothetical scenarios in which patients, irrespective of  
6 their immigration status, were considered to have died at 30 days or 1 year following their last  
7 recorded health system contact.  
8  
9  
10  
11  
12

## 13 14 **RESULTS**

15  
16  
17 The total study sample included 389,777 people (9.7% immigrants). Of these 24,557 had  
18 ischemic stroke, 310,529 had cancer and 54,691 had schizophrenia (Figure 1). A greater  
19 proportion of patients with schizophrenia were immigrants (17.4%) compared to those with  
20 ischemic stroke (8.5%) or cancer (8.4%) (Table 1). Irrespective of the underlying diagnosis,  
21 immigrants were younger at the time of the diagnosis and more likely to reside in a low-income  
22 neighbourhood compared to long-term residents (Table 1). Other characteristics of the study  
23 cohorts are shown in Table 1 and e-table 3.  
24  
25  
26  
27  
28  
29  
30  
31

32 During a median follow-up of 7 years, 13,667 people (3.5%) were lost to follow-up across the  
33 three disease cohorts. A greater proportion of patients with schizophrenia were lost to follow-up  
34 (9.1%) than patients with ischemic stroke (2.7%) or cancer (2.6%) (Table 2). Immigrants were  
35 more likely than long-term residents to be lost to follow up in all disease cohorts (Table 2 and  
36 Figure 2); however, the magnitude of association between immigration status and loss to follow-  
37 up was greater in patients with ischemic stroke (HR 2.87; 95% CI 2.38-3.44) and cancer (HR  
38 3.07; 95% CI 2.91-3.23) than schizophrenia (HR 1.54; 95% CI 1.44-1.64) (Table 2).  
39  
40  
41  
42  
43  
44  
45  
46  
47

48 During 2.7 million person-years of follow-up, 176,301 deaths were recorded across the three  
49 disease cohorts. The crude mortality rate was highest in patients with ischemic stroke (95.3 per  
50 1000-person-years) followed by cancer (76.8 per 1000-person-year) and schizophrenia (13.7  
51 per 1000-person years). In all three disease cohorts, the unadjusted hazard of mortality was  
52  
53  
54  
55  
56  
57  
58  
59  
60

1  
2  
3 lower in immigrants compared to long-term residents (Table 2 and Figure 2). This remained true  
4  
5 even after adjusting for baseline differences in age, comorbidity, and area-level socio-economic  
6  
7 status, with an adjusted HR of death in immigrants compared to long-term residents of 0.78  
8  
9 (95% CI 0.73-0.84) in patients with ischemic stroke, a HR of 0.74 (95% CI 0.73-0.76) in patients  
10  
11 with cancer, and a HR of 0.54 (95% CI 0.50-0.59) in patients with schizophrenia (Table 2). The  
12  
13 magnitude of the mortality advantage in immigrants compared to long-term residents attenuated  
14  
15 after accounting for loss to follow-up, with adjusted HR of death in immigrants compared to long-  
16  
17 term residents of 0.83 (95% CI 0.77-0.89) for ischemic stroke, 0.78 (95% CI 0.76-0.79) for  
18  
19 cancer, and 0.56 (95% CI 0.51-0.61) for schizophrenia (Table 2).  
20  
21

22  
23 The ratio of the two adjusted HRs obtained using models with and without accounting for loss to  
24  
25 follow-up was 0.95 [95% confidence limits (CL), 0.93 to 0.97] for ischemic stroke, 0.96 (95% CL,  
26  
27 0.95 to 0.96) for cancer and 0.97 (95% CL, 0.96 to 0.98) for schizophrenia, suggesting that not  
28  
29 accounting for loss to follow-up overestimated the mortality advantage in immigrants in all  
30  
31 cohorts (Figure 3). The effect of not accounting for loss to follow-up on the association between  
32  
33 other covariates and mortality is shown in Figure 3.  
34  
35

### 36 Sensitivity analyses

37  
38  
39 Using a lag-time of 6 months in determining the date of last health care system contact, to  
40  
41 account for patients who have less frequent contact with the health care system, did not alter the  
42  
43 association between immigration status and mortality for any disease cohort (e-table 4).  
44  
45

46  
47 In hypothetical scenarios in which, irrespective of immigration status, patients lost to follow-up  
48  
49 were considered to be dead at 30 days and 1 year after loss to follow-up, the healthy immigrant  
50  
51 advantage was eliminated in patients with schizophrenia, and attenuated in patients with  
52  
53 ischemic stroke and cancer (Table 2).  
54

## 55 **DISCUSSION**

1  
2  
3 In this study using linked population-based data on over 380,000 patients with a new diagnosis  
4 of ischemic stroke, cancer or schizophrenia, we demonstrated that immigrants have a survival  
5 advantage but are also more likely to be lost to follow-up compared to long-term residents, with  
6 variations in the magnitude of both the mortality advantage and the proportion lost to follow-up  
7 across the disease groups studied. Not accounting for loss to follow-up overestimated the  
8 immigrant health advantage.  
9  
10  
11  
12  
13  
14  
15

16 Our finding of lower mortality in immigrants compared to long-term residents with stroke, cancer  
17 and schizophrenia is consistent with previous studies, including a large-scale meta-analysis of  
18 over 15.2 million immigrants across 92 countries. [13]. Potential explanations for lower mortality  
19 in immigrants include self-selection of immigrants based on health prior to migration [26], a  
20 healthier lifestyle in immigrants [27], and return migration [28]. We found that immigrants with  
21 schizophrenia had the greatest mortality advantage compared to those with ischemic stroke or  
22 cancer. Possible explanations include the relatively younger age of immigrants and long-term  
23 residents with schizophrenia, variations in disease-specific health care provision in immigrants  
24 compared to long-term residents [29,30], or other unmeasured confounders. While certain  
25 immigrant subgroups such as refugees or asylum seekers may be at increased risk of poor  
26 mental health outcomes [31] and mortality [32], the magnitude of the mortality advantage in  
27 immigrants with schizophrenia observed in our study is consistent with previous reports of lower  
28 suicide rates in immigrants compared to long-term residents across different ethnic groups in the  
29 US [33] and in Canadian youth [34].  
30  
31  
32  
33  
34  
35  
36  
37  
38  
39  
40  
41  
42  
43  
44  
45

46 In our study, loss to follow-up could be explained by either emigration from the province or by  
47 failure to access the health care system while remaining in the province. Since the medical  
48 conditions included in our cohorts typically require ongoing care, it is likely that emigration rather  
49 than failure to access the health care system accounts for the majority of the loss to follow-up in  
50 our study. Although our study does not provide information on the ultimate destination of those  
51  
52  
53  
54  
55  
56  
57  
58  
59  
60

1  
2  
3 emigrating, return to a home country and family supports at the end of life (the so-called salmon  
4 effect) has been described in immigrants with chronic conditions with physical health care needs  
5 such as ischemic stroke or cancer [35,36]. In contrast, those with schizophrenia may have less  
6 contact with the healthcare system because of their relatively young age or because of  
7 challenges in access related to mental illness, and may be less likely to return to their home  
8 country because of stigma related to mental health diagnoses in some countries of origin  
9 [37,38]. Our study did not allow us to determine whether loss to follow-up varied with disease  
10 severity, and previous studies have yielded inconsistent findings. For example, higher  
11 comorbidity in Denmark was associated with lower rates of emigration in immigrants whereas  
12 self-reported poor health in the US was associated with higher rates of emigration in Mexican  
13 immigrants [39,40].

14  
15  
16  
17  
18  
19  
20  
21  
22  
23  
24  
25  
26  
27 Because immigration status was directly related to the censoring event, loss to follow-up, we  
28 found that accounting for loss to follow-up altered the magnitude of the association between  
29 immigration status and mortality. Thus, previous estimates of the mortality advantage in  
30 immigrants that have relied on death statistics alone and did not account for loss to follow-up  
31 may have overestimated the immigrant health advantage [3,12,41]. Consistent with this, a study  
32 from England and Wales found that although there was an immigrant mortality advantage, the  
33 magnitude of the association between immigration status and mortality was lower in all three  
34 hypothetical scenarios of immigrants' exits out of the country [42]. We found that accounting for  
35 loss to follow-up did not change the magnitude of the association between mortality and other  
36 variables of interest included in the multivariable models, except for older age in the ischemic  
37 stroke and cancer cohorts. This suggests that studies using administrative health data to  
38 evaluate the association between other covariates (sex, income or comorbidities) and mortality  
39 could yield adequate results even if they fail to account for loss to follow-up.  
40  
41  
42  
43  
44  
45  
46  
47  
48  
49  
50  
51  
52  
53  
54  
55  
56  
57  
58  
59  
60

1  
2  
3 Our study is strengthened by the use of comprehensive administrative databases that allowed  
4 us to identify loss of health system contact in three separate chronic disease cohorts. The  
5 findings are likely to be generalizable to other jurisdictions with immigrant populations and to  
6 other disease conditions not included in this study, but the magnitude of bias may vary  
7 depending on the disease condition, health care jurisdiction, and immigrant-related variables  
8 (country of origin, time since immigration or immigration class).  
9  
10  
11  
12  
13  
14  
15

16 Some limitations merit discussion. We were only able to define people as immigrants based on  
17 their immigration records, and because these were collected systematically only after 1985,  
18 immigrants who arrived prior to 1985 had to be classified as long-term residents. We did not  
19 have information on factors such as physical activity [43] and smoking [44], or other chronic  
20 conditions that may be associated with mortality, and we did not have information specific to  
21 each disease condition such as disease severity, disability, response to treatment, or palliative  
22 care status, all of which could influence mortality. Because we only included people with a  
23 known medical condition, we are unable to comment on patterns of loss to follow-up in healthy  
24 immigrants and long-term residents. We used area-level income as a proxy for socioeconomic  
25 status, and recognize that this may not reflect individual level income or other measures of  
26 socioeconomic status such as wealth, education, or occupation. We also assumed that loss of  
27 health system contact equated to patients leaving the health care jurisdiction rather than  
28 reflecting an excellent recovery negating the need for ongoing medical management. However,  
29 the misclassification introduced by this assumption should not vary based on immigration status.  
30  
31 In addition, we assumed that, at least in immigrants, loss to follow-up was likely to be due to  
32 emigration to their home countries rather than to other parts of Canada or onwards to other  
33 regions of the world. A study from the IRCC found that only 9% of immigrants who landed in  
34 Ontario between 1991 and 2006 had moved to other provinces by 2006 [45]. Lastly, movement  
35 of individuals in and out of a health care jurisdiction is a dynamic process, and those who  
36  
37  
38  
39  
40  
41  
42  
43  
44  
45  
46  
47  
48  
49  
50  
51  
52  
53  
54  
55  
56  
57  
58  
59  
60

1  
2  
3 emigrate can return. If such individuals return after the end date of follow-up, they could be  
4  
5 falsely censored at the date of their emigration.  
6  
7

8 This study highlights the lower mortality in immigrants compared to long-term residents  
9  
10 previously observed in other studies, but also demonstrates that inadequate handling of loss to  
11  
12 follow-up can lead to biased estimates of the immigrant health advantage, as immigrant deaths  
13  
14 may not be captured if immigrants return to their home region when gravely ill. Based on these  
15  
16 findings, we recommend that future studies comparing mortality and other long-term outcomes in  
17  
18 immigrants and non-immigrants carefully record loss to follow-up in both groups, quantify it, and  
19  
20 account for it using appropriate methodology. When this information is not available, other  
21  
22 measures could include use of updated postal code files during follow-up [46], measuring  
23  
24 outcomes in the short term, or assuming specific rates of emigration based on previous reports.  
25  
26 Future research could evaluate reasons for the variation in the magnitude of the association  
27  
28 between immigration status and mortality based on the disease cohort, and evaluate the  
29  
30 association between immigration-specific (immigration class, country of origin and time since  
31  
32 immigration) and disease-specific (severity, palliative status and disease-related disability)  
33  
34 factors and loss to follow-up.  
35  
36  
37  
38  
39  
40  
41  
42  
43  
44  
45  
46  
47  
48  
49  
50  
51  
52  
53  
54  
55  
56  
57  
58  
59  
60

1  
2  
3 **Data sharing statement**– The data used in this study is held securely in coded form at ICES.

4 Data sharing agreements prohibit ICES from making the dataset publicly available, but access  
5 may be granted to those who meet prespecified criteria for confidential access. Please contact  
6 corresponding author for details.  
7  
8  
9

10  
11  
12 **Code availability** – Can be made available upon request to the corresponding author.  
13

14  
15 **Ethics approval** – This study was approved by Research Ethics Board at Sunnybrook Health  
16 Sciences Centre, Canada (ID: 158-2017).  
17  
18

### 19 **Patient and public involvement statement**

20  
21 Patients or the public WERE NOT involved in the design, or conduct, or reporting, or  
22 dissemination plans of our research  
23  
24  
25

### 26 **Disclaimer**

27  
28 The study was supported by ICES (formerly the Institute for Clinical Evaluative Sciences), which  
29 is supported by an annual grant from the Ontario Ministry of Health and Long-Term Care. Data  
30 were made available with help from the Immigration, Refugees and Citizenship Canada. Parts of  
31 this material are based on data and/or information compiled and provided by the Canadian  
32 Institute for Health Information. The analyses, opinions, results and conclusions reported in this  
33 article are those of the authors and are independent from the funding sources. No endorsement  
34 by ICES, the Ontario Ministry of Health and Long-Term Care, Canadian Institute for Health  
35 Information, or the Immigration, Refugees and Citizenship Canada is intended or should be  
36 inferred.  
37  
38  
39  
40  
41  
42  
43  
44  
45  
46  
47  
48  
49

### 50 **Contributorship statement**

51  
52 MVV, JF, and MKK were involved in the concept and design. MVV, PCA, JF were involved in  
53 data acquisition, and analysis. FLS and MKK were involved in the primary data acquisition data  
54  
55  
56  
57  
58  
59  
60

1  
2  
3 for Ontario Stroke Registry. MVV, JF, PA, MCC, AL, FLS and MKK were involved in developing  
4 the project and interpreting the results. MVV was responsible for drafting the manuscript which  
5 was critically revised by everyone. MKK supervised the study and is the guarantor.  
6  
7  
8  
9

### 10 **Funding**

11  
12 This study was funded from Heart and Stroke Foundation of Canada (HSFC GIA19-26333).

13  
14 MKK and PCA hold Mid-Career Investigator Awards from the Heart and Stroke Foundation of  
15 Canada. MKK holds the Lillian Love Chair in Women's Health from the University Health  
16 Network/University of Toronto. MVV holds a Fellowship Award from the Canadian Institutes of  
17 Health Research.  
18  
19  
20  
21  
22  
23

24 **Competing interests** – none.  
25  
26  
27  
28  
29  
30  
31  
32  
33  
34  
35  
36  
37  
38  
39  
40  
41  
42  
43  
44  
45  
46  
47  
48  
49  
50  
51  
52  
53  
54  
55  
56  
57  
58  
59  
60



## References

- 1 Vang Z, Sigouin J, Flenon A, *et al*. The Healthy Immigrant Effect in Canada: A Systematic Review. *Population Change and Lifecourse Strategic Knowledge Cluster Discussion Paper Series/ Un Réseau stratégique de connaissances Changements de population et parcours de vie Document de travail* 2015;**3**.<http://ir.lib.uwo.ca/pclc/vol3/iss1/4>
- 2 Syse A, Dzamarija MT, Kumar BN, *et al*. An observational study of immigrant mortality differences in Norway by reason for migration, length of stay and characteristics of sending countries. *BMC Public Health* 2018;**18**:508. doi:10.1186/s12889-018-5435-4
- 3 Omariba DWR, Ng E, Vissandjée B. Differences between immigrants at various durations of residence and host population in all-cause mortality, Canada 1991-2006. *Population Studies* 2014;**68**:339–57. doi:10.1080/00324728.2014.915050
- 4 McKeigue PM, Marmot MG. Mortality from coronary heart disease in Asian communities in London. *BMJ* 1988;**297**:903. doi:10.1136/bmj.297.6653.903
- 5 Cheung MC, Earle CC, Fischer HD, *et al*. Impact of Immigration Status on Cancer Outcomes in Ontario, Canada. *J Oncol Pract* 2017;**13**:e602–12. doi:10.1200/JOP.2016.019497
- 6 Tu JV, Chu A, Donovan LR, *et al*. The Cardiovascular Health in Ambulatory Care Research Team (CANHEART). *Circulation: Cardiovascular Quality and Outcomes* 2015;**8**:204–12. doi:10.1161/CIRCOUTCOMES.114.001416
- 7 Paszat L, Sutradhar R, Liu Y, *et al*. Risk of colorectal cancer among immigrants to Ontario, Canada. *BMC Gastroenterol* 2017;**17**:85. doi:10.1186/s12876-017-0642-5
- 8 Anderson KK, Cheng J, Susser E, *et al*. Incidence of psychotic disorders among first-generation immigrants and refugees in Ontario. *CMAJ* 2015;**187**:E279–86. doi:10.1503/cmaj.141420
- 9 Marmot MG, Adelstein AM, Bulusu L. Lessons from the study of immigrant mortality. *Lancet* 1984;**1**:1455–7.
- 10 McDonald JT, Kennedy S. Insights into the 'healthy immigrant effect': health status and health service use of immigrants to Canada. *Social Science & Medicine (1982)* 2004;**59**:1613–27. doi:10.1016/j.socscimed.2004.02.004
- 11 Markides KS, Eschbach K. Aging, migration, and mortality: current status of research on the Hispanic paradox. *J Gerontol B Psychol Sci Soc Sci* 2005;**60 Spec No 2**:68–75. doi:10.1093/geronb/60.special\_issue\_2.s68
- 12 Khan AM, Urquia M, Kornas K, *et al*. Socioeconomic gradients in all-cause, premature and avoidable mortality among immigrants and long-term residents using linked death records in Ontario, Canada. *J Epidemiol Community Health* 2017;**71**:625–32. doi:10.1136/jech-2016-208525
- 13 Aldridge RW, Nellums LB, Bartlett S, *et al*. Global patterns of mortality in international migrants: a systematic review and meta-analysis. *The Lancet* 2018;**392**:2553–66. doi:10.1016/S0140-6736(18)32781-8

- 14 Akl EA, Briel M, You JJ, *et al.* Potential impact on estimated treatment effects of information lost to follow-up in randomised controlled trials (LOST-IT): systematic review. *BMJ* 2012;**344**. doi:10.1136/bmj.e2809
- 15 Greenland S. Response and follow-up bias in cohort studies. *Am J Epidemiol* 1977;**106**:184–7. doi:10.1093/oxfordjournals.aje.a112451
- 16 Ontario Demographic Quarterly: Highlights of first quarter 2020 | Ontario.ca. <https://www.ontario.ca/page/ontario-demographic-quarterly-highlights-first-quarter-2020> (accessed 26 Apr 2021).
- 17 Government of Canada SC. The Daily — Immigration and ethnocultural diversity: Key results from the 2016 Census. 2017. <http://www.statcan.gc.ca/daily-quotidien/171025/dq171025b-eng.htm> (accessed 26 Oct 2017).
- 18 Kapral MK, Hall RE, Silver FL, *et al.* Registry of the Canadian Stroke Network. Report on the 2004/05 Ontario Stroke Audit. <https://www.ices.on.ca/~media/Files/Atlases-Reports/2009/RCSN-report-on-2004-05-Ontario-stroke-audit/Full-report.ashx>
- 19 Hall S, Schulze K, Groome P, *et al.* Using cancer registry data for survival studies: the example of the Ontario Cancer Registry. *J Clin Epidemiol* 2006;**59**:67–76. doi:10.1016/j.jclinepi.2005.05.001
- 20 Kurdyak P, Lin E, Green D, *et al.* Validation of a Population-Based Algorithm to Detect Chronic Psychotic Illness. *Can J Psychiatry* 2015;**60**:362–8. doi:10.1177/070674371506000805
- 21 Tu K, Chen Z, Lipscombe LL. Prevalence and incidence of hypertension from 1995 to 2005: a population-based study. *CMAJ* 2008;**178**:1429–35. doi:10.1503/cmaj.071283
- 22 Hux JE, Ivis F, Flintoft V, *et al.* Diabetes in Ontario: determination of prevalence and incidence using a validated administrative data algorithm. *Diabetes Care* 2002;**25**:512–6.
- 23 Gershon AS, Wang C, Guan J, *et al.* Identifying individuals with physician diagnosed COPD in health administrative databases. *COPD* 2009;**6**:388–94.
- 24 Schultz SE, Rothwell DM, Chen Z, *et al.* Identifying cases of congestive heart failure from administrative data: a validation study using primary care patient records. *Chronic Dis Inj Can* 2013;**33**:160–6.
- 25 Tu K, Nieuwlaat R, Cheng SY, *et al.* Identifying Patients With Atrial Fibrillation in Administrative Data. *Canadian Journal of Cardiology* 2016;**32**:1561–5. doi:10.1016/j.cjca.2016.06.006
- 26 Osypuk TL, Alonso A, Bates LM. Understanding the Healthy Immigrant Effect and Cardiovascular Disease: Looking to Big Data and Beyond. *Circulation* 2015;**132**:1522–4. doi:10.1161/CIRCULATIONAHA.115.018707
- 27 Yi SS, Thorpe LE, Zanowski JM, *et al.* Clinical Characteristics and Lifestyle Behaviors in a Population-Based Sample of Chinese and South Asian Immigrants With Hypertension. *Am J Hypertens* 2016;**29**:941–7. doi:10.1093/ajh/hpw014

- 1  
2  
3 28 Abraído-Lanza AF, Dohrenwend BP, Ng-Mak DS, *et al.* The Latino mortality paradox: a test  
4 of the 'salmon bias' and healthy migrant hypotheses. *Am J Public Health* 1999;**89**:1543–8.  
5 doi:10.2105/ajph.89.10.1543  
6
- 7 29 Yarnell CJ, Fu L, Manuel D, *et al.* Association Between Immigrant Status and End-of-Life  
8 Care in Ontario, Canada. *JAMA* 2017;**318**:1479–88. doi:10.1001/jama.2017.14418  
9
- 10 30 Chen A, Kazanjian A. 516: Ethnicity, Time in Canada and Pap Testing among Recent  
11 Immigrants to British Columbia, Canada. *Am J Epidemiol* 2005;**161**:S129–S129.  
12 doi:10.1093/aje/161.Supplement\_1.S129c  
13
- 14 31 Berthold SM, Kong S, Mollica RF, *et al.* Comorbid mental and physical health and health  
15 access in Cambodian refugees in the US. *J Community Health* 2014;**39**:1045–52.  
16 doi:10.1007/s10900-014-9861-7  
17
- 18 32 Hollander A-C. Social inequalities in mental health and mortality among refugees and other  
19 immigrants to Sweden – epidemiological studies of register data. *Glob Health Action* 2013;**6**.  
20 doi:10.3402/gha.v6i0.21059  
21
- 22 33 Borges G, Orozco R, Rafful C, *et al.* Suicidality, ethnicity and immigration in the USA.  
23 *Psychol Med* 2012;**42**:1175–84. doi:10.1017/S0033291711002340  
24
- 25 34 Saunders NR, Lebenbaum M, Stukel TA, *et al.* Suicide and self-harm trends in recent  
26 immigrant youth in Ontario, 1996-2012: a population-based longitudinal cohort study. *BMJ*  
27 *Open* 2017;**7**:e014863. doi:10.1136/bmjopen-2016-014863  
28
- 29 35 Bonifazi C, Paparusso A. Remain or return home: The migration intentions of first-generation  
30 migrants in Italy. *Population, Space and Place* 2019;**25**:e2174. doi:10.1002/psp.2174  
31
- 32 36 Diaz CJ, Koning SM, Martinez-Donate AP. Moving Beyond Salmon Bias: Mexican Return  
33 Migration and Health Selection. *Demography* 2016;**53**:2005–30. doi:10.1007/s13524-016-  
34 0526-2  
35
- 36 37 Saunders NR, Gill PJ, Holder L, *et al.* Use of the emergency department as a first point of  
37 contact for mental health care by immigrant youth in Canada: a population-based study.  
38 *CMAJ* 2018;**190**:E1183–91. doi:10.1503/cmaj.180277  
39
- 40 38 Derr AS. Mental Health Service Use Among Immigrants in the United States: A Systematic  
41 Review. *Psychiatr Serv* 2016;**67**:265–74. doi:10.1176/appi.ps.201500004  
42
- 43 39 Norredam M, Hansen OH, Petersen JH, *et al.* Remigration of migrants with severe disease:  
44 myth or reality?--a register-based cohort study. *Eur J Public Health* 2015;**25**:84–9.  
45 doi:10.1093/eurpub/cku138  
46
- 47 40 Arenas E, Goldman N, Pebley AR, *et al.* Return Migration to Mexico: Does Health Matter?  
48 *Demography* 2015;**52**:1853–68. doi:10.1007/s13524-015-0429-7  
49
- 50 41 Kennedy S, Kidd MP, McDonald JT, *et al.* The Healthy Immigrant Effect: Patterns and  
51 Evidence from Four Countries. *Int Migration & Integration* 2015;**16**:317–32.  
52 doi:10.1007/s12134-014-0340-x  
53  
54  
55  
56  
57  
58  
59  
60

- 1  
2  
3 42 Wallace M, Kulu H. Low immigrant mortality in England and Wales: a data artefact? *Soc Sci*  
4 *Med* 2014;**120**:100–9. doi:10.1016/j.socscimed.2014.08.032  
5  
6 43 Murray CJ, Lopez AD. Global mortality, disability, and the contribution of risk factors: Global  
7 Burden of Disease Study. *Lancet* 1997;**349**:1436–42. doi:10.1016/S0140-6736(96)07495-8  
8  
9 44 GBD 2015 Tobacco Collaborators. Smoking prevalence and attributable disease burden in  
10 195 countries and territories, 1990–2015: a systematic analysis from the Global Burden of  
11 Disease Study 2015. *Lancet* 2017;**389**:1885–906. doi:10.1016/S0140-6736(17)30819-X  
12  
13 45 Interprovincial Mobility of Immigrants in Canada 2006–2011 - Canada.ca.  
14 [https://www.canada.ca/en/immigration-refugees-citizenship/corporate/reports-](https://www.canada.ca/en/immigration-refugees-citizenship/corporate/reports-statistics/research/interprovincial-mobility-immigrants-canada-2006-2011.html)  
15 [statistics/research/interprovincial-mobility-immigrants-canada-2006-2011.html](https://www.canada.ca/en/immigration-refugees-citizenship/corporate/reports-statistics/research/interprovincial-mobility-immigrants-canada-2006-2011.html) (accessed 2  
16 Mar 2020).  
17  
18 46 Youens D, Preen DB, Harris MN, *et al.* The importance of historical residential address  
19 information in longitudinal studies using administrative health data. *Int J Epidemiol*  
20 2018;**47**:69–80. doi:10.1093/ije/dyx156  
21  
22  
23  
24  
25  
26  
27  
28  
29  
30  
31  
32  
33  
34  
35  
36  
37  
38  
39  
40  
41  
42  
43  
44  
45  
46  
47  
48  
49  
50  
51  
52  
53  
54  
55  
56  
57  
58  
59  
60

1  
2  
3 **Figure 1.** Cohort selection and follow-up.  
4

5 Footnote: values in parenthesis represent proportion.  
6  
7  
8  
9  
10  
11  
12  
13  
14  
15  
16  
17  
18  
19  
20  
21  
22  
23  
24  
25  
26  
27  
28  
29  
30  
31  
32  
33  
34  
35  
36  
37  
38  
39  
40  
41  
42  
43  
44  
45  
46  
47  
48  
49  
50  
51  
52  
53  
54  
55  
56  
57  
58  
59  
60

For peer review only

**Table 1.** Baseline characteristics in immigrants and long-term residents with a first-ever diagnosis of ischemic stroke, cancer or schizophrenia between 2002 and 2012 in Ontario, Canada.

|                                            | Ischemic stroke |                     | Cancer        |                     | Schizophrenia |                     |
|--------------------------------------------|-----------------|---------------------|---------------|---------------------|---------------|---------------------|
|                                            | Immigrants      | Long-term residents | Immigrants    | Long-term residents | Immigrants    | Long-term residents |
|                                            | 2078 (8.5)      | 22,479 (91.5)       | 26,084 (8.4)  | 284,445 (91.6)      | 9525 (17.4)   | 45,166 (82.6)       |
| Female, n (%)                              | 982 (47.3)      | 10,697 (47.6)       | 13,602 (52.1) | 130,324 (45.8)      | 4346 (45.6)   | 19,943 (44.2)       |
| Median age in years at index event (Q1-Q3) | 68 (55-78)      | 74 (63-82)          | 58 (48-70)    | 67 (58-76)          | 34 (25-45)    | 40 (26-53)          |
| Neighbourhood-level income, n (%)          |                 |                     |               |                     |               |                     |
| Lowest quintile (1 <sup>st</sup> )         | 668 (32.1)      | 5043 (22.4)         | 7041 (27.0)   | 50,044 (17.6)       | 3803 (39.9)   | 13,525 (29.9)       |
| Highest quintile (5 <sup>th</sup> )        | 201 (9.7)       | 4330 (19.3)         | 3326 (12.8)   | 62,667 (22.0)       | 734 (7.7)     | 6434 (14.2)         |
| Hypertension, n (%)                        | 1420 (68.3)     | 16,046 (71.4)       | 11,120 (42.6) | 152,177 (53.5)      | 1165 (12.2)   | 8253 (18.3)         |
| Diabetes, n (%)                            | 727 (35.0)      | 6495 (28.9)         | 4850 (18.6)   | 53,444 (18.8)       | 737 (7.7)     | 4178 (9.3)          |
| Congestive heart failure, n (%)            | 258 (12.4)      | 3728 (16.6)         | 878 (3.4)     | 20,721 (7.3)        | 59 (0.6)      | 807 (1.8)           |
| COPD, n (%)                                | 111 (5.3)       | 2547 (11.3)         | 1023 (3.9)    | 31,745 (11.2)       | 60 (0.6)      | 1494 (3.3)          |
| Atrial fibrillation, n (%)                 | 243 (11.7)      | 3786 (16.8)         | 777 (3.0)     | 19,278 (6.8)        | 34 (0.4)      | 525 (1.2)           |

3 COPD – chronic obstructive pulmonary disease.

1 **Table 2.** Loss to follow-up and mortality in immigrants and long-term residents in Ontario, Canada.

|                                                                                                   | Ischemic stroke  |                     | Cancer           |                     | Schizophrenia    |                     |
|---------------------------------------------------------------------------------------------------|------------------|---------------------|------------------|---------------------|------------------|---------------------|
|                                                                                                   | Immigrants       | Long-term residents | Immigrants       | Long-term residents | Immigrants       | Long-term residents |
| N (%)                                                                                             | 2078 (8.5)       | 22,479 (91.5)       | 26,084 (8.4)     | 284,445 (91.6)      | 9525 (17.4)      | 45,166 (82.6)       |
| Loss to follow-up, n (%)                                                                          | 158 (7.6)        | 512 (2.3)           | 2016 (7.7)       | 5995 (2.1)          | 1238 (13.0)      | 3748 (8.3)          |
| Adjusted HR of loss to follow-up (95% CI) <sup>a</sup> accounting for the competing risk of death | 2.87 (2.38-3.44) | 1.00                | 3.07 (2.91-3.23) | 1.00                | 1.54 (1.44-1.64) | 1.00                |
| Death, n (%)                                                                                      | 796 (35.4)       | 12,575 (55.9)       | 9014 (34.6)      | 146,723 (51.6)      | 546 (5.7)        | 6647 (14.7)         |
| Unadjusted HR of death (95 %CI)                                                                   | 0.61 (0.56-0.65) | 1.00                | 0.60 (0.59-0.62) | 1.00                | 0.39 (0.35-0.42) | 1.00                |
| Adjusted HR <sup>a</sup> (95% CI) not accounting for loss to follow-up                            | 0.78 (0.73-0.84) | 1.00                | 0.74 (0.73-0.76) | 1.00                | 0.54 (0.50-0.59) | 1.00                |
| Adjusted HR <sup>a</sup> (95% CI) accounting for loss to follow-up <sup>b</sup>                   | 0.83 (0.77-0.89) | 1.00                | 0.78 (0.76-0.79) | 1.00                | 0.56 (0.51-0.61) | 1.00                |
| Sensitivity analyses <sup>c</sup>                                                                 |                  |                     |                  |                     |                  |                     |
| Death within 30 days of loss to follow-up                                                         |                  |                     |                  |                     |                  |                     |
| Adjusted HR (95% CI)                                                                              | 0.93 (0.87-1.00) | 1.00                | 0.90 (0.88-0.91) | 1.00                | 1.00 (0.95-1.05) | 1.00                |
| Death within 1 year of loss to follow-up                                                          |                  |                     |                  |                     |                  |                     |
| Adjusted HR (95% CI)                                                                              | 0.93 (0.87-0.99) | 1.00                | 0.89 (0.87-0.91) | 1.00                | 1.00 (0.95-1.06) | 1.00                |

<sup>a</sup>Multivariable model adjusting for the following: age, sex, neighbourhood-level income, and comorbidities (known hypertension, diabetes, congestive heart failure, chronic obstructive pulmonary disease, and atrial fibrillation); <sup>b</sup>censoring those who were lost to follow-up, which was determined when date of last health system contact occurred before end of follow-up among those alive; <sup>c</sup>assigning date of death among those lost to follow-up and re-calculating adjusted hazard of death.

Abbreviations: HR – hazard ratio, CI – confidence interval.

1  
2  
3  
4  
5  
6  
7  
8  
9  
10  
11  
12  
13  
14  
15  
16  
17  
18  
19  
20  
21  
22  
23  
24  
25  
26  
27  
28  
29  
30  
31  
32  
33  
34  
35  
36  
37  
38  
39  
40  
41  
42  
43  
44  
45  
46  
47  
48  
49  
50  
51  
52  
53  
54  
55  
56  
57  
58  
59  
60

1

2 **Figure 2.** Unadjusted cumulative incidence functions in immigrants (red) and long-term  
3 residents (blue) showing probability of death and of loss to follow-up in patients with  
4 ischemic stroke (top), primary cancer (middle) and schizophrenia (bottom).

For peer review only



1  
2  
3 **Figure 3.** Ratios of adjusted hazard ratios of death obtained using two multivariable cox-  
4 regression models with and without accounting for loss to follow-up. Each box  
5 represents the point estimate of this ratio, and the error bars represent 95% confidence  
6 limits. Values less than 1 suggest overestimation of the magnitude of association when  
7 loss to follow-up is not accounted for.  
8  
9

10 Footnote: Immigrants are compared to long-term residents; age less than 55 years is the comparison group; and the  
11 5<sup>th</sup> quintile of income represent the HR of death in the highest quintile compared to lowest quintile based on  
12 neighbourhood-level income.  
13  
14  
15  
16  
17  
18  
19  
20  
21  
22  
23  
24  
25  
26  
27  
28  
29  
30  
31  
32  
33  
34  
35  
36  
37  
38  
39  
40  
41  
42  
43  
44  
45  
46  
47  
48  
49  
50  
51  
52  
53  
54  
55  
56  
57  
58  
59  
60

For peer review only

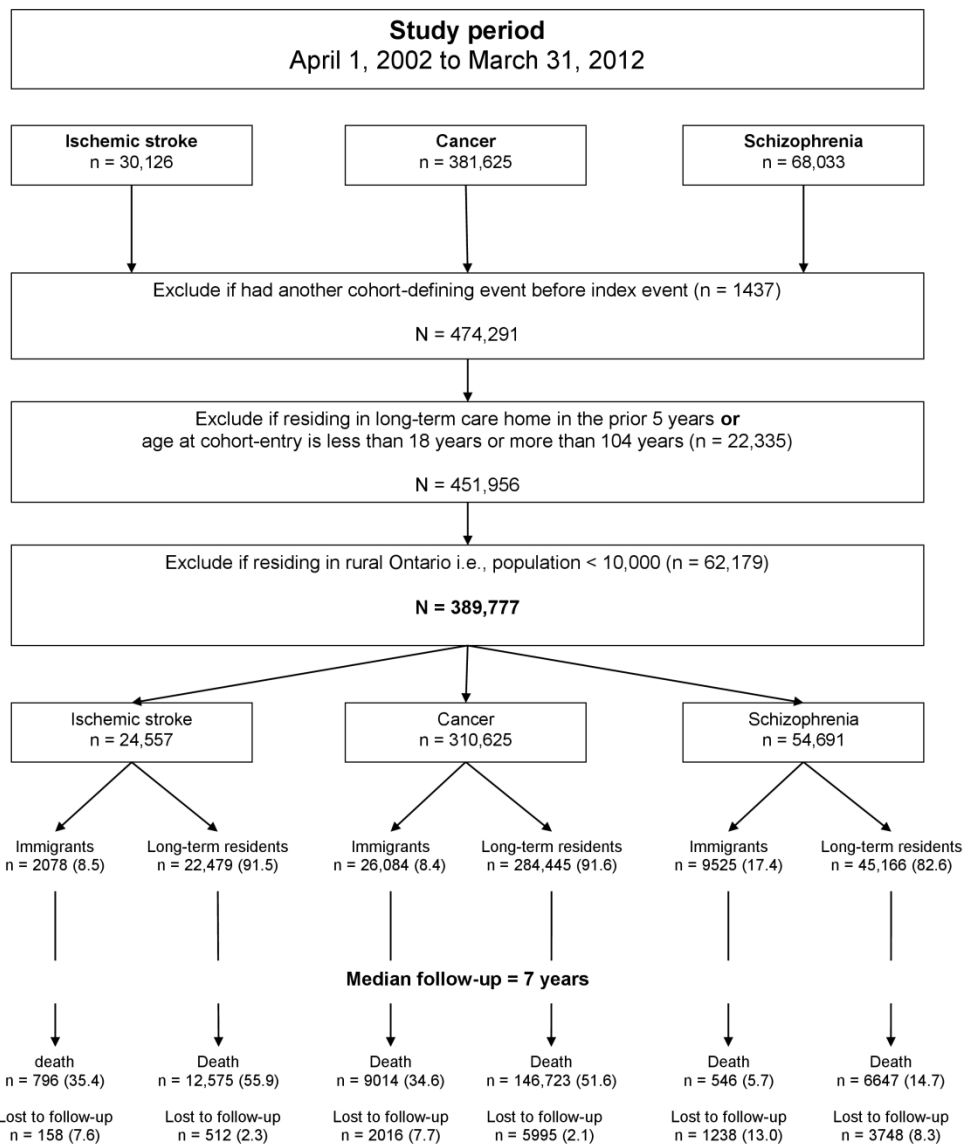

Figure 1

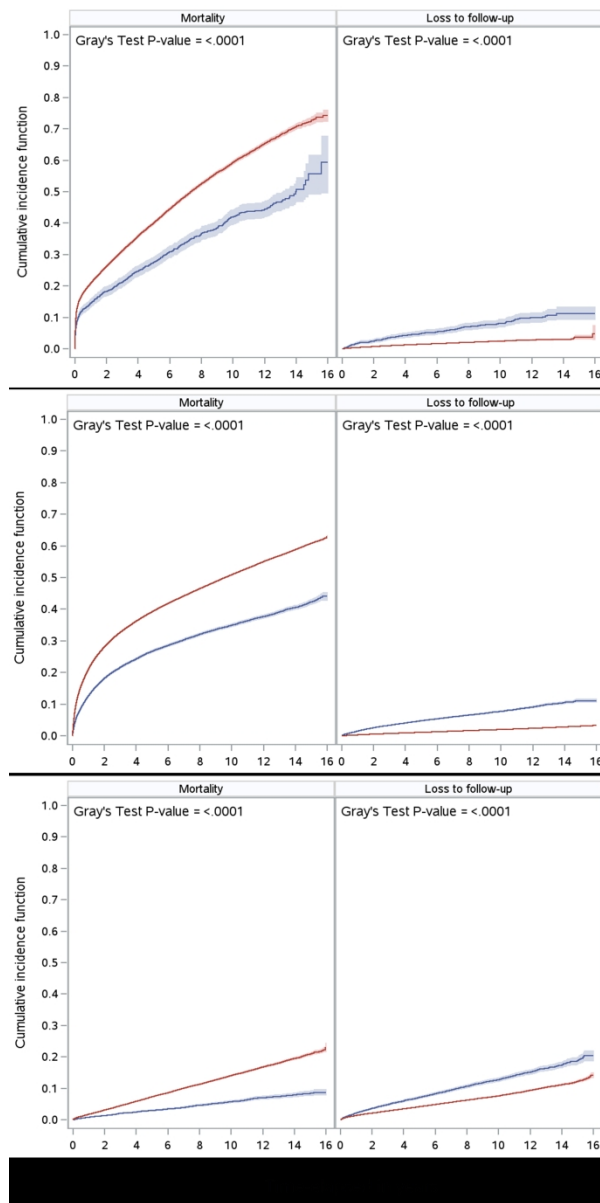

Figure 2

1  
2  
3  
4  
5  
6  
7  
8  
9  
10  
11  
12  
13  
14  
15  
16  
17  
18  
19  
20  
21  
22  
23  
24  
25  
26  
27  
28  
29  
30  
31  
32  
33  
34  
35  
36  
37  
38  
39  
40  
41  
42  
43  
44  
45  
46  
47  
48  
49  
50  
51  
52  
53  
54  
55  
56  
57  
58  
59  
60

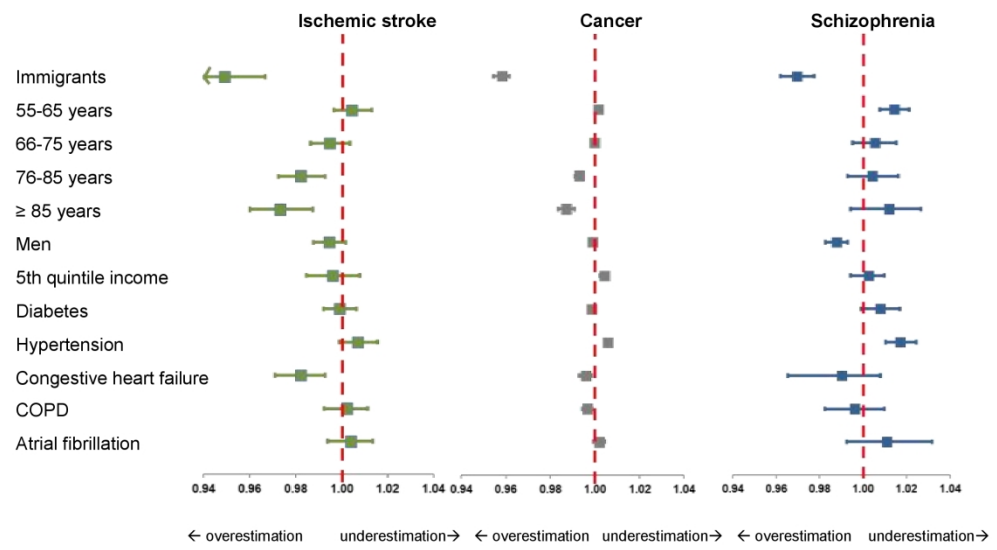

Figure 3

## Appendix

**e-table 1.** Definitions of variables included in the study.

**e-table 2.** Administrative databases used to determine date of last health system contact and statistics on contact with health care system in Ontario.

**e-table 3.** Characteristics of immigrants included in the study.

**e-table 4.** Results of sensitivity analyses using a lag-time of 6 months when determining the date of last health system contact.

**e-figure 1.** Hypothetical cases to illustrate loss to follow-up using administrative database. Subject A was not lost to follow-up, Subject B would be considered lost to follow-up, and Subject C had the event of interest (death) and so is not considered lost to follow-up.

**e-figure 2.** Sensitivity analyses adding 180 days to last date of follow-up. Only for Subject B does addition of 180 days to follow-up change their censoring time; whereas, censoring times remain same for Subject A and C.

**e-table 1.** Definitions of variables included in the study.

| Variable                 | Definition                                                                                                                                                                                                                                                                                                                                                                                                                                                                                                             |
|--------------------------|------------------------------------------------------------------------------------------------------------------------------------------------------------------------------------------------------------------------------------------------------------------------------------------------------------------------------------------------------------------------------------------------------------------------------------------------------------------------------------------------------------------------|
| Incident ischemic stroke | Hospitalized or non-hospitalized (seen in the emergency department but not admitted) adult patients with confirmed acute ischemic stroke between April 1, 2002 and March 31, 2013 seen at all 150 acute care institutions in the province. Participating hospitals included comprehensive stroke centres and non-stroke centres. Information gathered using chart abstractors with neurological expertise, with the final diagnosis and other data elements obtained through review of clinical and neuroimaging data. |
| Incident primary cancer  | A diagnosis of cancer either in hospitalized or non-hospitalized adult patients obtained from 4 different sources: hospital or ER visit using appropriate ICD codes, pathology reports with a diagnosis of cancer, regional cancer centres where patients with cancer are seen, and death certificates.                                                                                                                                                                                                                |
| Incident schizophrenia   | A primary diagnosis of schizophrenia or schizoaffective disorder from a general hospital bed (prior to 2002, ICD9 - 295; as of 2002 ICD10 - F20 or F25)<br><b>OR</b><br>primary diagnosis of schizophrenia from a psychiatric hospital bed (DSM-IV – 295.x)<br><b>OR</b><br>three outpatient visits with a diagnosis of schizophrenia (295 or F20/F25) from outpatient physician billings within a 3-year period.<br><br>93.1% Sensitivity - 58.7% Specificity                                                         |

|                                              |                                                                                                                                                                                                                                                                                                                                                                 |
|----------------------------------------------|-----------------------------------------------------------------------------------------------------------------------------------------------------------------------------------------------------------------------------------------------------------------------------------------------------------------------------------------------------------------|
| Hypertension                                 | <p>≥ 1 Hospitalization [add diagnostic codes to be consistent with DM section? Same for other variables.]</p> <p><b>OR</b></p> <p>≥ 2 physician claims in a two-year period</p> <p><b>OR</b></p> <p>1 physician claim followed by another physician claim or hospitalization within two years.</p> <p>72% Sensitivity - 95% Specificity - 87% PPV - 88% NPV</p> |
| Diabetes                                     | <p>≥ 3 physician claims for diagnostic code (250) in a one-year period</p> <p>79.9% Sensitivity - 99.1% Specificity - 91.4% PPV</p>                                                                                                                                                                                                                             |
| CHF (congestive heart failure)               | <p>≥ 1 Hospitalization</p> <p><b>OR</b></p> <p>1 physician claim in ER or clinic, followed by ≥ 1 Hospitalization, ER visit, or physician claim within one year.</p> <p>84.8% Sensitivity - 97.0% Specificity - 55.6% PPV</p>                                                                                                                                   |
| Atrial fibrillation                          | <p>1 hospitalization or 1 emergency room visit, ICD-10 (2002 onwards) – I48; ICD-9 (pre-2002) – 427.31 or 427.32</p> <p><b>OR</b></p> <p>Technical billing code for cardioversion billing code Z437</p>                                                                                                                                                         |
| COPD (chronic obstructive pulmonary disease) | <p>≥1 Hospitalization for COPD</p> <p><b>OR</b></p> <p>≥ 3 physician claims in a two-year period</p> <p>57.5% Sensitivity - 95.4% Specificity</p>                                                                                                                                                                                                               |

**e-table 2.** Administrative databases used to determine date of last health system contact and statistics on contact with health care system in Ontario.

Updated quarterly

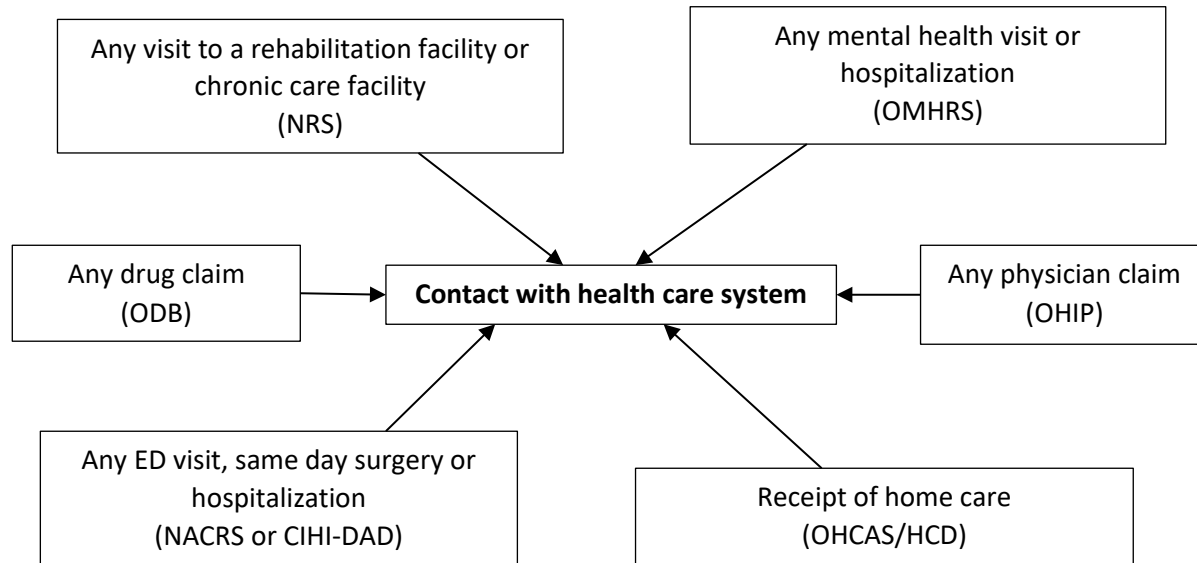

**Abbreviations:**

NRS – National Rehabilitation Reporting System; ODB – Ontario Drug Benefit; NACRS – National Ambulatory Care Reporting System; CIHI-DAD – Canadian Institute for Health Information-Discharge Abstract Database; OHCAS – Ontario Home Care Administration System; HCD – Home Care Database; OHIP – Ontario Health Insurance Plan Claims Database; OMHRS – Ontario Mental Health Reporting System. ED – Emergency Department



**e-table 3.** Characteristics of immigrants included in the study.

| <b>Immigration-specific characteristics</b> | <b>Ischemic stroke<br/>n = 2078</b> | <b>Cancer<br/>n = 26,084</b> | <b>Schizophrenia<br/>n = 9525</b> |
|---------------------------------------------|-------------------------------------|------------------------------|-----------------------------------|
| <i>World region of origin</i>               |                                     |                              |                                   |
| Africa                                      | 81 (3.9)                            | 1128 (4.3)                   | 980 (10.3)                        |
| Caribbean                                   | 193 (9.3)                           | 1902 (7.3)                   | 967 (10.2)                        |
| East Asia                                   | 403 (19.4)                          | 5331 (20.4)                  | 1319 (13.8)                       |
| Latin America                               | 171 (8.2)                           | 1736 (6.7)                   | 738 (7.7)                         |
| Middle East                                 | 194 (9.3)                           | 2701 (10.4)                  | 947 (9.9)                         |
| South Asia                                  | 392 (18.9)                          | 4094 (15.7)                  | 2271 (23.8)                       |
| Western                                     | 526 (25.3)                          | 7525 (28.8)                  | 1895 (19.9)                       |
| Missing                                     | 392 (18.9)                          | 1667 (6.4)                   | 408 (4.3)                         |
| <i>Time since arrival</i>                   |                                     |                              |                                   |
| ≤ 10 years                                  | 677 (32.6)                          | 10360 (39.7)                 | 4763 (50.0)                       |
| > 10 years                                  | 1401 (67.4)                         | 15724 (60.3)                 | 4762 (50.0)                       |
| <i>Immigration class</i>                    |                                     |                              |                                   |
| Economic                                    | 468 (22.5)                          | 9262 (35.5)                  | 3213 (33.7)                       |
| Family or other                             | 1273 (61.3)                         | 13233 (50.7)                 | 3891 (37.8)                       |
| Refugee                                     | 337 (16.2)                          | 3589 (13.8)                  | 2421 (25.4)                       |

**e-table 4.** Results of sensitivity analyses using a lag-time of 6 months when determining the date of last health system contact.

|                                            |                                    | <b>Ischemic stroke</b> | <b>Cancer</b>    | <b>Schizophrenia</b> |
|--------------------------------------------|------------------------------------|------------------------|------------------|----------------------|
| Immigrants                                 | Lost to follow-up, n (%)           | 145 (7.0)              | 1895 (7.3)       | 1120 (11.8)          |
| Long-term residents                        |                                    | 472 (2.1)              | 5472 (1.9)       | 3333 (7.4)           |
| Immigrants                                 | Death, n (%)                       | 796 (35.4)             | 9014 (34.6)      | 546 (5.7)            |
| Long-term residents                        |                                    | 12,575 (55.9)          | 146,723 (51.6)   | 6647 (14.7)          |
| Adjusted HR of death (95% CI) <sup>^</sup> | Immigrants vs. long-term residents | 0.82 (0.77-0.89)       | 0.77 (0.76-0.79) | 0.56 (0.51-0.61)     |

<sup>^</sup>Accounting for loss of follow-up by censoring those lost to follow-up.

April 1, 2002 Study Duration January 31, 2020

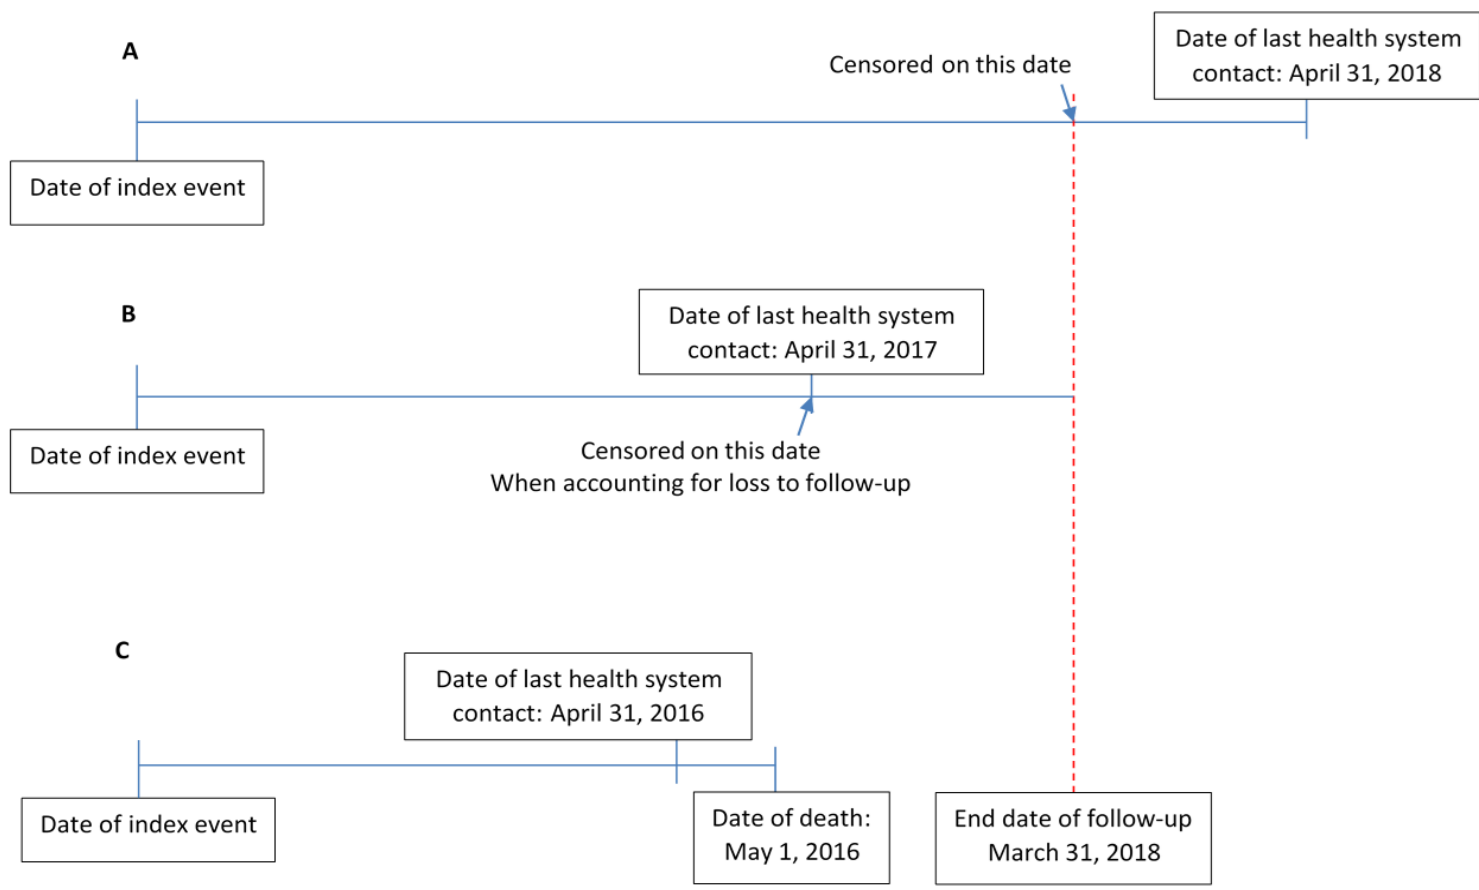

**e-figure 1.** Hypothetical cases to illustrate loss to follow-up using administrative database. Subject A was not lost to follow-up, Subject B would be considered lost to follow-up, and Subject C had the event of interest (death) and so is not considered lost to follow-up.

1  
2  
3  
4  
5  
6  
7  
8  
9  
10  
11  
12  
13  
14  
15  
16  
17  
18  
19  
20  
21  
22  
23  
24  
25  
26  
27  
28  
29  
30  
31  
32  
33  
34  
35  
36  
37  
38  
39  
40  
41  
42  
43  
44  
45  
46  
47

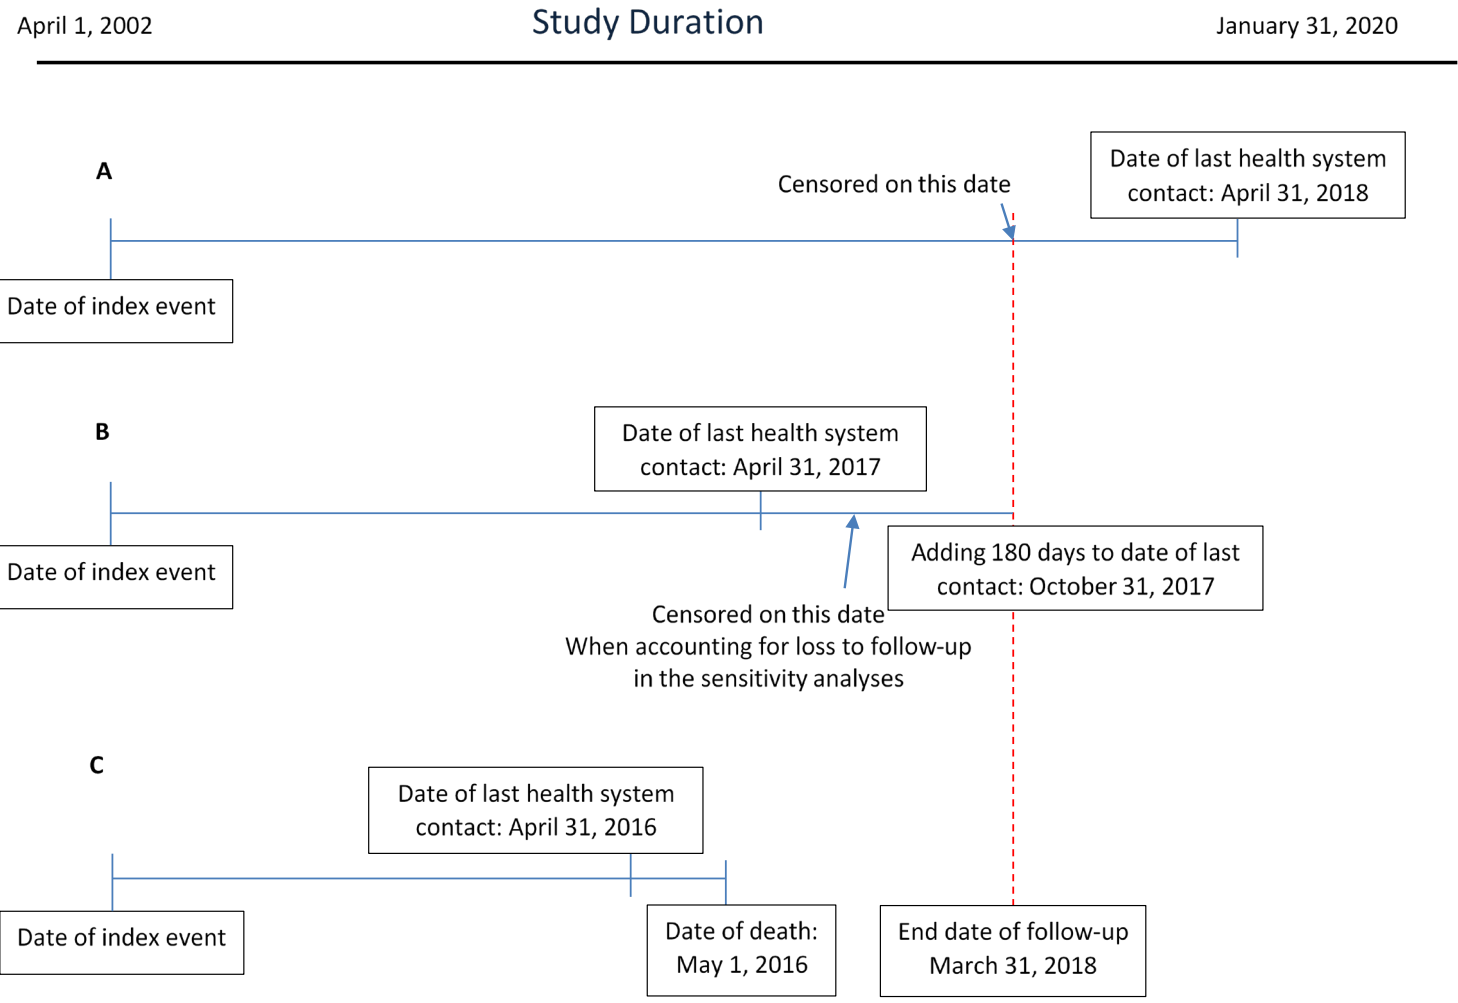

**e-figure 2.** Sensitivity analyses adding 180 days to last date of follow-up. Only for Subject B does addition of 180 days to follow-up change their censoring time; whereas, censoring times remain same for Subject A and C.

STROBE Statement—Checklist of items that should be included in reports of *cohort studies*

|                           | Item No | Recommendation                                                                                                                                                                                    | Location             |
|---------------------------|---------|---------------------------------------------------------------------------------------------------------------------------------------------------------------------------------------------------|----------------------|
| <b>Title and abstract</b> | 1       | (a) Indicate the study's design with a commonly used term in the title or the abstract                                                                                                            | Page 2               |
|                           |         | (b) Provide in the abstract an informative and balanced summary of what was done and what was found                                                                                               | Page 2               |
| <b>Introduction</b>       |         |                                                                                                                                                                                                   |                      |
| Background/rationale      | 2       | Explain the scientific background and rationale for the investigation being reported                                                                                                              | Page 4               |
| Objectives                | 3       | State specific objectives, including any prespecified hypotheses                                                                                                                                  | Page 4               |
| <b>Methods</b>            |         |                                                                                                                                                                                                   |                      |
| Study design              | 4       | Present key elements of study design early in the paper                                                                                                                                           | Page 5               |
| Setting                   | 5       | Describe the setting, locations, and relevant dates, including periods of recruitment, exposure, follow-up, and data collection                                                                   | Page 5               |
| Participants              | 6       | (a) Give the eligibility criteria, and the sources and methods of selection of participants. Describe methods of follow-up                                                                        | Page 5 and e-table 2 |
|                           |         | (b) For matched studies, give matching criteria and number of exposed and unexposed                                                                                                               | n.a.                 |
| Variables                 | 7       | Clearly define all outcomes, exposures, predictors, potential confounders, and effect modifiers. Give diagnostic criteria, if applicable                                                          | Page 5 and e-table 1 |
| Data sources/ measurement | 8*      | For each variable of interest, give sources of data and details of methods of assessment (measurement). Describe comparability of assessment methods if there is more than one group              | Page 5 and e-table 1 |
| Bias                      | 9       | Describe any efforts to address potential sources of bias                                                                                                                                         | Page 6               |
| Study size                | 10      | Explain how the study size was arrived at                                                                                                                                                         | Figure 1             |
| Quantitative variables    | 11      | Explain how quantitative variables were handled in the analyses. If applicable, describe which groupings were chosen and why                                                                      | Table 1              |
| Statistical methods       | 12      | (a) Describe all statistical methods, including those used to control for confounding                                                                                                             | Page 6-7             |
|                           |         | (b) Describe any methods used to examine subgroups and interactions                                                                                                                               | Page 6-7             |
|                           |         | (c) Explain how missing data were addressed                                                                                                                                                       | None present         |
|                           |         | (d) If applicable, explain how loss to follow-up was addressed                                                                                                                                    | e-table 2 and page 7 |
|                           |         | (e) Describe any sensitivity analyses                                                                                                                                                             | Page 8               |
| <b>Results</b>            |         |                                                                                                                                                                                                   |                      |
| Participants              | 13*     | (a) Report numbers of individuals at each stage of study—eg numbers potentially eligible, examined for eligibility, confirmed eligible, included in the study, completing follow-up, and analysed | Figure 1             |
|                           |         | (b) Give reasons for non-participation at each stage                                                                                                                                              | Figure 1             |

|                          |     |                                                                                                                                                                                                              |                        |
|--------------------------|-----|--------------------------------------------------------------------------------------------------------------------------------------------------------------------------------------------------------------|------------------------|
|                          |     | (c) Consider use of a flow diagram                                                                                                                                                                           | Figure 1               |
| Descriptive data         | 14* | (a) Give characteristics of study participants (eg demographic, clinical, social) and information on exposures and potential confounders                                                                     | Table 1                |
|                          |     | (b) Indicate number of participants with missing data for each variable of interest                                                                                                                          | None with missing data |
|                          |     | (c) Summarise follow-up time (eg, average and total amount)                                                                                                                                                  | Page 8                 |
| Outcome data             | 15* | Report numbers of outcome events or summary measures over time                                                                                                                                               | Page 9 and Table 2     |
| Main results             | 16  | (a) Give unadjusted estimates and, if applicable, confounder-adjusted estimates and their precision (eg, 95% confidence interval). Make clear which confounders were adjusted for and why they were included | Page 9, and table 2    |
|                          |     | (b) Report category boundaries when continuous variables were categorized                                                                                                                                    | Table 2                |
|                          |     | (c) If relevant, consider translating estimates of relative risk into absolute risk for a meaningful time period                                                                                             | n.a.                   |
| Other analyses           | 17  | Report other analyses done—eg analyses of subgroups and interactions, and sensitivity analyses                                                                                                               | Figure 3               |
| <b>Discussion</b>        |     |                                                                                                                                                                                                              |                        |
| Key results              | 18  | Summarise key results with reference to study objectives                                                                                                                                                     | Page 10                |
| Limitations              | 19  | Discuss limitations of the study, taking into account sources of potential bias or imprecision. Discuss both direction and magnitude of any potential bias                                                   | Page 12                |
| Interpretation           | 20  | Give a cautious overall interpretation of results considering objectives, limitations, multiplicity of analyses, results from similar studies, and other relevant evidence                                   | Page 10                |
| Generalisability         | 21  | Discuss the generalisability (external validity) of the study results                                                                                                                                        | Page 12                |
| <b>Other information</b> |     |                                                                                                                                                                                                              |                        |
| Funding                  | 22  | Give the source of funding and the role of the funders for the present study and, if applicable, for the original study on which the present article is based                                                | Page 15                |

\*Give information separately for exposed and unexposed groups.

**Note:** An Explanation and Elaboration article discusses each checklist item and gives methodological background and published examples of transparent reporting. The STROBE checklist is best used in conjunction with this article (freely available on the Web sites of PLoS Medicine at <http://www.plosmedicine.org/>, Annals of Internal Medicine at <http://www.annals.org/>, and Epidemiology at <http://www.epidem.com/>). Information on the STROBE Initiative is available at <http://www.strobe-statement.org>.

# BMJ Open

## The importance of accounting for loss to follow-up when comparing mortality between immigrants and long-term residents: a population-based retrospective cohort

|                                 |                                                                                                                                                                                                                                                                                                                                                                                                                                                                              |
|---------------------------------|------------------------------------------------------------------------------------------------------------------------------------------------------------------------------------------------------------------------------------------------------------------------------------------------------------------------------------------------------------------------------------------------------------------------------------------------------------------------------|
| Journal:                        | <i>BMJ Open</i>                                                                                                                                                                                                                                                                                                                                                                                                                                                              |
| Manuscript ID                   | bmjopen-2020-046377.R2                                                                                                                                                                                                                                                                                                                                                                                                                                                       |
| Article Type:                   | Original research                                                                                                                                                                                                                                                                                                                                                                                                                                                            |
| Date Submitted by the Author:   | 27-Sep-2021                                                                                                                                                                                                                                                                                                                                                                                                                                                                  |
| Complete List of Authors:       | Vyas, Manav; University of Toronto, Division of Neurology<br>Fang, Jiming; ICES<br>Austin, Peter; ICES<br>Laupacis, Andreas; University of Toronto, Department of Medicine<br>Cheung, Matthew; University of Toronto, Division of Haematology & Oncology, Department of Medicine<br>Silver, Frank ; University of Toronto, Division of Neurology, Department of Medicine<br>Kapral, MK; University of Toronto, Division of General Internal Medicine, Department of Medicine |
| <b>Primary Subject Heading</b>: | Epidemiology                                                                                                                                                                                                                                                                                                                                                                                                                                                                 |
| Secondary Subject Heading:      | Health services research                                                                                                                                                                                                                                                                                                                                                                                                                                                     |
| Keywords:                       | EPIDEMIOLOGY, SOCIAL MEDICINE, PUBLIC HEALTH                                                                                                                                                                                                                                                                                                                                                                                                                                 |
|                                 |                                                                                                                                                                                                                                                                                                                                                                                                                                                                              |

SCHOLARONE™  
Manuscripts



I, the Submitting Author has the right to grant and does grant on behalf of all authors of the Work (as defined in the below author licence), an exclusive licence and/or a non-exclusive licence for contributions from authors who are: i) UK Crown employees; ii) where BMJ has agreed a CC-BY licence shall apply, and/or iii) in accordance with the terms applicable for US Federal Government officers or employees acting as part of their official duties; on a worldwide, perpetual, irrevocable, royalty-free basis to BMJ Publishing Group Ltd ("BMJ") its licensees and where the relevant Journal is co-owned by BMJ to the co-owners of the Journal, to publish the Work in this journal and any other BMJ products and to exploit all rights, as set out in our [licence](#).

The Submitting Author accepts and understands that any supply made under these terms is made by BMJ to the Submitting Author unless you are acting as an employee on behalf of your employer or a postgraduate student of an affiliated institution which is paying any applicable article publishing charge ("APC") for Open Access articles. Where the Submitting Author wishes to make the Work available on an Open Access basis (and intends to pay the relevant APC), the terms of reuse of such Open Access shall be governed by a Creative Commons licence – details of these licences and which [Creative Commons](#) licence will apply to this Work are set out in our licence referred to above.

Other than as permitted in any relevant BMJ Author's Self Archiving Policies, I confirm this Work has not been accepted for publication elsewhere, is not being considered for publication elsewhere and does not duplicate material already published. I confirm all authors consent to publication of this Work and authorise the granting of this licence.



1  
2  
3 **The importance of accounting for loss to follow-up when comparing mortality between**  
4 **immigrants and long-term residents: a population-based retrospective cohort**  
5  
6

7  
8 Manav V. Vyas<sup>1,2,3</sup>, Jiming Fang<sup>3</sup>, Peter C. Austin<sup>2,3</sup>, Andreas Laupacis<sup>2,3,4</sup> Matthew C.

9  
10 Cheung<sup>2,3,5</sup>, Frank L. Silver<sup>1,3</sup> and Moira K. Kapral<sup>2,3,4</sup>  
11

- 12  
13 1. Division of Neurology, Department of Medicine, University of Toronto, Canada  
14  
15 2. Institute of Health Policy, Management and Evaluation, University of Toronto, Canada  
16  
17 3. ICES, Toronto, Canada  
18  
19 4. Division of General Internal Medicine, Department of Medicine, University of Toronto, Canada  
20  
21 5. Division of Haematology & Oncology, Department of Medicine, University of Toronto, Canada  
22  
23

24 Abstract count: 247 words  
25

26 Running Title: Immigration, Emigration, and Mortality  
27

28 Word count: 3,414 words (not including abstract, references, tables, and figures)  
29

30 Character count of the title: 160 (with spaces)  
31

32 Number of references: 39  
33

34 Keywords: immigration, emigration, mortality, lost to follow-up, emigration.  
35

36 Figures: 3  
37

38 Tables: 2  
39  
40  
41  
42

43 Corresponding author:  
44

45 Dr Manav V. Vyas, MBBS MSc PhD FRCPC  
46

47 Staff Neurologist, St. Michael's Hospital-Unity Health Toronto  
48

49 Assistant Professor, Department of Medicine, Temerty Faculty of Medicine, University of Toronto  
50

51 Office: Li Ka Shing Knowledge Institute, Rm 628, 250 Yonge Street, Toronto, ON M5B 2L7  
52

53 Email: manav.vyas@mail.utoronto.ca | Phone: 416-864-5056 | Fax: 416-864-5712  
54  
55  
56  
57  
58  
59  
60

## ABSTRACT

**Objectives:** To evaluate the association between immigration status and all-cause mortality in different disease cohorts, and the impact of loss to follow-up on the observed associations.

**Design:** Population-based retrospective cohort study using linked administrative health data in Ontario, Canada.

**Setting:** We followed adults with a first-ever diagnosis of ischemic stroke, cancer, or schizophrenia between 2002 and 2013 from index event to death, loss to follow-up, or end of follow-up in 2018.

**Primary and secondary outcome measures:** Our outcomes of interest were all-cause mortality and loss to follow-up. For each disease cohort, we calculated adjusted hazard ratios (HR) of death in immigrants compared to long-term residents, adjusting for demographic characteristics and comorbidities, with and without censoring for those who were lost to follow-up. We calculated the ratio of two the HRs and the respective confidence limits (CL) using bootstrapping methods.

**Results:** Immigrants were more likely to be lost to follow-up than long-term residents in all disease cohorts. Not accounting for this loss to follow-up overestimated the magnitude of the association between immigration status and mortality in those with ischemic stroke (HR of death before vs. after accounting for censoring: 0.78 vs. 0.83, ratio = 0.95; 95% CL, 0.93-0.97), cancer (0.74 vs. 0.78, ratio = 0.96; 0.95-0.96), and schizophrenia (0.54 vs. 0.56, ratio = 0.97; 0.96-0.98).

**Conclusions:** Immigrants to Canada have a survival advantage that varies by the disease studied. The magnitude of this advantage is modestly overestimated by not accounting for the higher loss to follow-up in immigrants.

## ARTICLE SUMMARY

### Strengths and limitations of this study

- This is the first study in Canada to compare the rates of loss to follow-up in a population-based sample of immigrants and long-term residents with stroke, cancer, or schizophrenia.
- Using appropriate statistical analyses, we compared the hazard of mortality, adjusted for confounders, between immigrants and long-term residents with and without accounting for loss to follow-up.
- Loss to follow-up was determined using administrative data definitions which may not be complete.
- Long-term residents consisted of Canadian born and those who migrated before 1985, limiting generalizability of the findings to all immigrants.

## INTRODUCTION

Studies from high-income countries, including Canada, have shown that immigrants have a lower mortality compared to host populations [1–3]. This immigrant health advantage has been observed not only for all-cause mortality, but also for cardiovascular [4] and cancer mortality [5], and for the incidence of non-communicable chronic conditions such as cardiovascular disease [6], cancer [7] and schizophrenia [8].

This phenomenon has been termed the *healthy immigrant effect*, and is partly attributed to a selection bias whereby only those who are healthy and have human capital are able to migrate [9,10]. However, another potential explanation for the observed immigrant health advantage is a phenomenon termed the *salmon effect*, whereby immigrants return to their home countries when they are gravely ill [11]. Thus, they are lost to follow-up and not accounted for in studies that rely on mortality statistics that do not record emigration [12]. Such lack of complete follow-up was identified in a large-scale meta-analysis on immigrant mortality in which none of the included 96 studies accounted for loss to follow-up and only 29 (28%) studies identified loss to follow-up as an issue [13]. Previous work in both observational studies and randomized controlled trials has shown that unbalanced loss to follow-up in two comparison groups can lead to biased estimates of association [14,15].

The aims of this study were to use linked population-based data from Ontario, Canada to evaluate the association between immigration status and all-cause mortality after a new diagnosis of ischemic stroke, cancer, or schizophrenia, to quantify loss to follow-up in immigrants compared to long-term residents, and to determine how accounting for loss to follow-up influences the association between immigration status and all-cause mortality in each disease cohort.

## METHODS

### Patient and public involvement statement

Patients or the public were not involved in the design, or conduct, or reporting, or dissemination plans of our research

### Setting and population

Ontario is Canada's most populous province, with an estimated population of 14 million [16]. In 2016, approximately 3.8 million immigrants were living in Ontario, accounting for about 30% of the total population [17]. All residents of Ontario (except for undocumented migrants and those visiting) are covered by the provincial health plan that includes physician services, hospital and emergency care, and investigations ordered by physicians. The linked administrative databases in Ontario capture all health care system contacts of insured Ontario residents.

We created three separate incident disease cohorts of ischemic stroke, primary cancer and schizophrenia using validated case definitions for incidence during an ascertainment period of April 1, 2002 to March 31, 2012 (e-table 1). We focused on these three diseases because they are chronic conditions associated with high morbidity that require regular health care system contact (which is captured in administrative databases) following the diagnosis, and because management of these conditions may benefit from family and social supports, which can be a factor in emigration. We identified patients with ischemic stroke using the Ontario Stroke Registry which is a province-wide registry that includes data on a random sample of consecutive patients seen at over 150 hospitals in Ontario [18]. Data collection for the registry was performed by chart abstractors with neurological expertise, with the final diagnosis and other data elements obtained through review of clinical and neuroimaging data. We identified patients with a diagnosis of a primary malignant cancer from the Ontario Cancer Registry, a population-based registry, which is created by combining information from discharge and day surgery summaries, pathology reports with any mention of cancer, or records of patients referred to specialized

1  
2  
3 institutions treating cancer patients in Ontario [19]. It captures approximately 95% of all cancer  
4 diagnoses in the province [19]. We identified patients with schizophrenia based on a validated  
5 algorithm whereby a diagnosis of schizophrenia was made if the patient had one or more  
6 hospital admissions and/or three or more outpatient visits with a diagnosis of schizophrenia or  
7 schizoaffective disorder [20].  
8  
9  
10  
11  
12

13  
14 Within each disease cohort, we excluded prevalent cases if they had a diagnosis of the specific  
15 disease prior to April 1, 2002. If patients had multiple cohort-defining events during the  
16 ascertainment period, only information at the time of the first cohort-defining event was recorded.  
17 We excluded patients who were younger than 18 years or older than 104 years at the time of the  
18 index event, those who resided in long-term care homes at the time of the index event, and  
19 those who resided in rural areas (population < 10,000) because most immigrants (> 95%) reside  
20 in large urban areas.  
21  
22  
23  
24  
25  
26  
27  
28

29 Using unique identifiers, we linked these cohorts to population-based data held securely at ICES  
30 (formerly known as the Institute for Clinical Evaluative Sciences), Toronto. ICES is a prescribed  
31 entity under the Ministry of Health and Long-Term Care where Ontario's public health services  
32 data sets are stored, linked, and used for research. We obtained information on neighbourhood-  
33 level income (in quintiles) based on the postal-code files, and on previous diagnoses of  
34 hypertension [21], diabetes [22], chronic obstructive pulmonary disease (COPD) [23], congestive  
35 heart failure (CHF) [24] and atrial fibrillation [25] using validated case definitions (e-table 1).  
36  
37  
38  
39  
40  
41  
42  
43  
44

#### 45 Exposure and outcomes

46  
47

48 Our exposure of interest was immigration status obtained from the Ministry of Immigration,  
49 Refugee and Citizenship (IRCC) Permanent Resident Database which collected information on  
50 all immigrants who arrived in Ontario after 1985. As information on immigration status was only  
51 available after 1985, we classified individuals born outside of Canada who arrived in Ontario  
52  
53  
54  
55  
56  
57  
58  
59  
60

1  
2  
3 after 1985 as *immigrants*, and those born in Canada or those who were born outside of Canada  
4  
5 but arrived before 1985 as *long-term residents*.  
6  
7

8 Our primary outcome was death from any cause, which was obtained from the death registry  
9  
10 along with the date of death. We set the end date of follow-up as March 31, 2018.  
11

12 We determined each person's date of last contact with the health system by using administrative  
13  
14 databases to identify any contact with health care system such as a visit to a doctor's office, refill  
15  
16 of prescriptions (in those over 65 years), hospitalization or emergency visits, receipt of home  
17  
18 care, or admission to a rehabilitation facility (e-table 2) until January 31, 2020, the latest date for  
19  
20 which information from the administrative databases was available. The health care system  
21  
22 contact could be for any reason, and not pertaining to the index diagnosis alone. Those who  
23  
24 were not recorded as dying prior to March 31, 2018 (end date of follow-up), and who had their  
25  
26 last health system contact prior to this date were flagged as *lost to follow-up* at the date of last  
27  
28 health system contact (e-Figure 1).  
29  
30  
31

### 32 Statistical analyses

33  
34  
35 Analyses were conducted separately in each disease cohort. We compared baseline  
36  
37 characteristics between immigrants and long-term residents within each disease cohort using  
38  
39 the Chi-squared test for categorical variables and the Wilcoxon rank sum test for continuous  
40  
41 variables.  
42  
43

44 We used the time of the index diagnosis as time zero. We estimated unadjusted cumulative  
45  
46 incidence functions for death and loss to follow-up in immigrants and long-term residents,  
47  
48 separately. We developed multivariable cause-specific hazards models to estimate the adjusted  
49  
50 hazard ratio (HR) of loss to follow-up in immigrants compared to long-term residents accounting  
51  
52 for death as a competing event, and adjusting for age, sex, neighbourhood-level income,  
53  
54 hypertension, diabetes, COPD, CHF, and atrial fibrillation.  
55  
56  
57  
58  
59  
60

1  
2  
3 We then fit two multivariable Cox proportional hazards models to estimate the adjusted HR of  
4 death in immigrants compared to long-term residents, adjusting for demographic information and  
5 chronic conditions as before. In the first model, which did not account for loss to follow-up, we  
6 censored individuals only on March 31, 2018. In the second model, which accounted for loss to  
7 follow-up, we censored individuals on the first of either March 31, 2018, or the date of last health  
8 system contact.  
9  
10  
11  
12  
13  
14  
15

16 We then calculated a ratio of the two adjusted HRs obtained from these two models and  
17 calculated 95% confidence limits around this ratio using percentile-based bootstrapping methods  
18 and 1000 bootstrap samples. If the confidence limits for the ratio included 1, it would suggest  
19 that there is no statistical difference between the adjusted HRs obtained with and without  
20 accounting for loss to follow-up. The direction and magnitude of the difference between two HRs  
21 can be inferred based on the ratio, with values under 1 suggesting overestimation of the  
22 association between immigration status and mortality when not accounting for loss to follow-up.  
23 We similarly obtained adjusted HRs of death for each covariate in the multivariable models using  
24 two separate models, with and without accounting for loss to follow-up. Using the methods  
25 described above, we also evaluated whether the association between other covariates and  
26 mortality changed after accounting for loss to follow-up. All analyses were conducted using SAS  
27 9.4 Copyright © 2002-2012 by SAS Institute Inc., Cary, NC, USA. We did not involve patients or  
28 the public in the design, or conduct, or reporting, or dissemination plans of our research.  
29  
30  
31  
32  
33  
34  
35  
36  
37  
38  
39  
40  
41  
42  
43

#### 44 Sensitivity analyses

45  
46  
47 We re-defined the date of last health care system contact as the recorded date plus 180 days to  
48 account for patients who may not interact with health care system for up to 6 months (e-figure 2)  
49 and then re-calculated the adjusted hazard of death accounting for loss to follow-up for each  
50 disease cohort. We chose a *lag-time* of 6 months because all patients in this study had a chronic  
51 condition that would typically require follow-up within this time frame.  
52  
53  
54  
55  
56  
57  
58  
59  
60



1  
2  
3 To evaluate how the association between immigration status and mortality would change if those  
4 lost to follow-up had died, we re-calculated the adjusted hazard of death in immigrants  
5 compared to long-term residents in two hypothetical scenarios in which patients, irrespective of  
6 their immigration status, were considered to have died at 30 days or 1 year following their last  
7 recorded health system contact.  
8  
9  
10  
11  
12

## 13 14 **RESULTS**

15  
16  
17 The total study sample included 389,777 people (9.7% immigrants). Of these 24,557 had  
18 ischemic stroke, 310,529 had cancer and 54,691 had schizophrenia (Figure 1). A greater  
19 proportion of patients with schizophrenia were immigrants (17.4%) compared to those with  
20 ischemic stroke (8.5%) or cancer (8.4%) (Table 1). Irrespective of the underlying diagnosis,  
21 immigrants were younger at the time of the diagnosis and more likely to reside in a low-income  
22 neighbourhood compared to long-term residents (Table 1). Other characteristics of the study  
23 cohorts are shown in Table 1 and e-table 3.  
24  
25  
26  
27  
28  
29  
30  
31

32 During a median follow-up of 7 years, 13,667 people (3.5%) were lost to follow-up across the  
33 three disease cohorts. A greater proportion of patients with schizophrenia were lost to follow-up  
34 (9.1%) than patients with ischemic stroke (2.7%) or cancer (2.6%) (Table 2). Immigrants were  
35 more likely than long-term residents to be lost to follow up in all disease cohorts (Table 2 and  
36 Figure 2); however, the magnitude of association between immigration status and loss to follow-  
37 up was greater in patients with ischemic stroke (HR 2.87; 95% CI 2.38-3.44) and cancer (HR  
38 3.07; 95% CI 2.91-3.23) than schizophrenia (HR 1.54; 95% CI 1.44-1.64) (Table 2).  
39  
40  
41  
42  
43  
44  
45  
46  
47

48 During 2.7 million person-years of follow-up, 176,301 deaths were recorded across the three  
49 disease cohorts. The crude mortality rate was highest in patients with ischemic stroke (95.3 per  
50 1000-person-years) followed by cancer (76.8 per 1000-person-year) and schizophrenia (13.7  
51 per 1000-person years). In all three disease cohorts, the unadjusted hazard of mortality was  
52  
53  
54  
55  
56  
57  
58  
59  
60

1  
2  
3 lower in immigrants compared to long-term residents (Table 2 and Figure 2). This remained true  
4  
5 even after adjusting for baseline differences in age, comorbidity, and area-level socio-economic  
6  
7 status, with an adjusted HR of death in immigrants compared to long-term residents of 0.78  
8  
9 (95% CI 0.73-0.84) in patients with ischemic stroke, a HR of 0.74 (95% CI 0.73-0.76) in patients  
10  
11 with cancer, and a HR of 0.54 (95% CI 0.50-0.59) in patients with schizophrenia (Table 2). The  
12  
13 magnitude of the mortality advantage in immigrants compared to long-term residents attenuated  
14  
15 after accounting for loss to follow-up, with adjusted HR of death in immigrants compared to long-  
16  
17 term residents of 0.83 (95% CI 0.77-0.89) for ischemic stroke, 0.78 (95% CI 0.76-0.79) for  
18  
19 cancer, and 0.56 (95% CI 0.51-0.61) for schizophrenia (Table 2).  
20  
21

22  
23 The ratio of the two adjusted HRs obtained using models with and without accounting for loss to  
24  
25 follow-up was 0.95 [95% confidence limits (CL), 0.93 to 0.97] for ischemic stroke, 0.96 (95% CL,  
26  
27 0.95 to 0.96) for cancer and 0.97 (95% CL, 0.96 to 0.98) for schizophrenia, suggesting that not  
28  
29 accounting for loss to follow-up overestimated the mortality advantage in immigrants in all  
30  
31 cohorts (Figure 3). This is equivalent to a relative change in the HR of death (in immigrants vs.  
32  
33 long-term residents) of 5% for ischemic stroke, 4% for cancer and 3% for schizophrenia. The  
34  
35 effect of not accounting for loss to follow-up on the association between other covariates and  
36  
37 mortality is shown in Figure 3.  
38  
39

#### 40 Sensitivity analyses

41  
42  
43 Using a lag-time of 6 months in determining the date of last health care system contact, to  
44  
45 account for patients who have less frequent contact with the health care system, did not alter the  
46  
47 association between immigration status and mortality for any disease cohort (e-table 4).  
48  
49

50 In hypothetical scenarios in which, irrespective of immigration status, patients lost to follow-up  
51  
52 were considered to be dead at 30 days and 1 year after loss to follow-up, the healthy immigrant  
53  
54  
55  
56  
57  
58  
59  
60

1  
2  
3 advantage was eliminated in patients with schizophrenia and attenuated in patients with  
4  
5 ischemic stroke and cancer (Table 2).  
6  
7

## 8 **DISCUSSION**

9

10  
11 In this study using linked population-based data on over 380,000 patients with a new diagnosis  
12  
13 of ischemic stroke, cancer, or schizophrenia, we demonstrated that immigrants have a survival  
14  
15 advantage but are also more likely to be lost to follow-up compared to long-term residents, with  
16  
17 variations in the magnitude of both the mortality advantage and the proportion lost to follow-up  
18  
19 across the disease groups studied. Not accounting for loss to follow-up overestimated the  
20  
21 immigrant health advantage.  
22  
23

24  
25 Our finding of lower mortality in immigrants compared to long-term residents with stroke, cancer  
26  
27 and schizophrenia is consistent with previous studies, including a large-scale meta-analysis of  
28  
29 over 15.2 million immigrants across 92 countries. [13]. Potential explanations for lower mortality  
30  
31 in immigrants include self-selection of immigrants based on health prior to migration [26], a  
32  
33 healthier lifestyle in immigrants [27], and return migration [28]. We found that immigrants with  
34  
35 schizophrenia had the greatest mortality advantage compared to those with ischemic stroke or  
36  
37 cancer. Possible explanations include the relatively younger age of immigrants and long-term  
38  
39 residents with schizophrenia, variations in disease-specific health care provision in immigrants  
40  
41 compared to long-term residents [29,30], or other unmeasured confounders. While certain  
42  
43 immigrant subgroups such as refugees or asylum seekers may be at increased risk of poor  
44  
45 mental health outcomes [31] and mortality [32], the magnitude of the mortality advantage in  
46  
47 immigrants with schizophrenia observed in our study is consistent with previous reports of lower  
48  
49 suicide rates in immigrants compared to long-term residents across different ethnic groups in the  
50  
51 US [33] and in Canadian youth [34].  
52  
53  
54  
55  
56  
57  
58  
59  
60

1  
2  
3 In our study, loss to follow-up could be explained by either emigration from the province or by  
4 failure to access the health care system while remaining in the province. Since the medical  
5 conditions included in our cohorts typically require ongoing care, it is likely that emigration rather  
6 than failure to access the health care system accounts for the majority of the loss to follow-up in  
7 our study. Although our study does not provide information on the ultimate destination of those  
8 emigrating, return to a home country and family supports at the end of life (the so-called salmon  
9 effect) has been described in immigrants with chronic conditions with physical health care needs  
10 such as ischemic stroke or cancer [35,36]. In contrast, those with schizophrenia may have less  
11 contact with the healthcare system because of their relatively young age or because of  
12 challenges in access related to mental illness, and may be less likely to return to their home  
13 country because of stigma related to mental health diagnoses in some countries of origin  
14 [37,38]. Our study did not allow us to determine whether loss to follow-up varied with disease  
15 severity, and previous studies have yielded inconsistent findings. For example, higher  
16 comorbidity in Denmark was associated with lower rates of emigration in immigrants whereas  
17 self-reported poor health in the US was associated with higher rates of emigration in Mexican  
18 immigrants [39,40].

19  
20 Because immigration status was directly related to the censoring event, loss to follow-up, we  
21 found that accounting for loss to follow-up altered the magnitude of the association between  
22 immigration status and mortality. Thus, previous estimates of the mortality advantage in  
23 immigrants that have relied on death statistics alone and did not account for loss to follow-up  
24 may have overestimated the immigrant health advantage [3,12,41]. Consistent with this, a study  
25 from England and Wales found that although there was an immigrant mortality advantage, the  
26 magnitude of the association between immigration status and mortality was lower in all three  
27 hypothetical scenarios of immigrants' exits out of the country [42]. We found that accounting for  
28 loss to follow-up did not change the magnitude of the association between mortality and other

1  
2  
3 variables of interest included in the multivariable models, except for older age in the ischemic  
4 stroke and cancer cohorts. This suggests that studies using administrative health data to  
5 evaluate the association between other covariates (sex, income or comorbidities) and mortality  
6 could yield adequate results even if they fail to account for loss to follow-up.  
7  
8  
9

10  
11  
12 Our study is strengthened by the use of comprehensive administrative databases that allowed  
13 us to identify loss of health system contact in three separate chronic disease cohorts. The  
14 findings are likely to be generalizable to other jurisdictions with immigrant populations and to  
15 other disease conditions not included in this study, but the magnitude of bias may vary  
16 depending on the disease condition, health care jurisdiction, and immigrant-related variables  
17 (country of origin, time since immigration or immigration class).  
18  
19  
20  
21  
22  
23

24  
25 Some limitations merit discussion. We were only able to define people as immigrants based on  
26 their immigration records, and because these were collected systematically only after 1985,  
27 immigrants who arrived prior to 1985 had to be classified as long-term residents. We did not  
28 have information on factors such as physical activity [43] and smoking [44], or other chronic  
29 conditions that may be associated with mortality, and we did not have information specific to  
30 each disease condition such as disease severity, disability, response to treatment, or palliative  
31 care status, all of which could influence mortality. Because we only included people with a  
32 known medical condition, we are unable to comment on patterns of loss to follow-up in healthy  
33 immigrants and long-term residents. We used area-level income as a proxy for socioeconomic  
34 status, and recognize that this may not reflect individual level income or other measures of  
35 socioeconomic status such as wealth, education, or occupation. We also assumed that loss of  
36 health system contact equated to patients leaving the health care jurisdiction rather than  
37 reflecting an excellent recovery negating the need for ongoing medical management. However,  
38 the misclassification introduced by this assumption should not vary based on immigration status.  
39  
40  
41  
42  
43  
44  
45  
46  
47  
48  
49  
50  
51  
52  
53  
54  
55 In addition, we assumed that, at least in immigrants, loss to follow-up was likely to be due to  
56  
57  
58  
59  
60

1  
2  
3 emigration to their home countries rather than to other parts of Canada or onwards to other  
4 regions of the world. A study from the IRCC found that only 9% of immigrants who landed in  
5 Ontario between 1991 and 2006 had moved to other provinces by 2006 [45]. Lastly, movement  
6 of individuals in and out of a health care jurisdiction is a dynamic process, and those who  
7 emigrate can return. If such individuals return after the end date of follow-up, they could be  
8 falsely censored at the date of their emigration.  
9  
10  
11  
12  
13  
14  
15

16 This study highlights the lower mortality in immigrants compared to long-term residents  
17 previously observed in other studies, but also demonstrates that inadequate handling of loss to  
18 follow-up can lead to biased estimates of the immigrant health advantage, as immigrant deaths  
19 may not be captured if immigrants return to their home region when gravely ill. Based on these  
20 findings, we recommend that future studies comparing mortality and other long-term outcomes in  
21 immigrants and non-immigrants carefully record loss to follow-up in both groups, quantify it, and  
22 account for it using appropriate methodology. When this information is not available, other  
23 measures could include use of updated postal code files during follow-up [46], measuring  
24 outcomes in the short term, or assuming specific rates of emigration based on previous reports.  
25 Future research could evaluate reasons for the variation in the magnitude of the association  
26 between immigration status and mortality based on the disease cohort, and evaluate the  
27 association between immigration-specific (immigration class, country of origin and time since  
28 immigration) and disease-specific (severity, palliative status and disease-related disability)  
29 factors and loss to follow-up.  
30  
31  
32  
33  
34  
35  
36  
37  
38  
39  
40  
41  
42  
43  
44  
45  
46  
47  
48  
49  
50  
51  
52  
53  
54  
55  
56  
57  
58  
59  
60

1  
2  
3 **Data sharing statement**– The data used in this study is held securely in coded form at ICES.

4 Data sharing agreements prohibit ICES from making the dataset publicly available, but access  
5 may be granted to those who meet prespecified criteria for confidential access. Please contact  
6 corresponding author for details.  
7  
8  
9

10  
11  
12 **Code availability** – Can be made available upon request to the corresponding author.  
13

14  
15 **Ethics approval** – This study was approved by Research Ethics Board at Sunnybrook Health  
16 Sciences Centre, Canada (ID: 158-2017).  
17  
18

### 19 **Disclaimer**

20  
21 The study was supported by ICES (formerly the Institute for Clinical Evaluative Sciences), which  
22 is supported by an annual grant from the Ontario Ministry of Health and Long-Term Care. Data  
23 were made available with help from the Immigration, Refugees and Citizenship Canada. Parts of  
24 this material are based on data and/or information compiled and provided by the Canadian  
25 Institute for Health Information. The analyses, opinions, results and conclusions reported in this  
26 article are those of the authors and are independent from the funding sources. No endorsement  
27 by ICES, the Ontario Ministry of Health and Long-Term Care, Canadian Institute for Health  
28 Information, or the Immigration, Refugees and Citizenship Canada is intended or should be  
29 inferred.  
30  
31  
32  
33  
34  
35  
36  
37  
38  
39  
40  
41

### 42 **Contributorship statement**

43  
44 MVV, JF, and MKK were involved in the concept and design. MVV, PCA, JF were involved in  
45 data acquisition, and analysis. FLS and MKK were involved in the primary data acquisition data  
46 for Ontario Stroke Registry. MVV, JF, PA, MCC, AL, FLS and MKK were involved in developing  
47 the project and interpreting the results. MVV was responsible for drafting the manuscript which  
48 was critically revised by everyone. MKK supervised the study and is the guarantor.  
49  
50  
51  
52  
53  
54  
55  
56  
57  
58  
59  
60

**Funding**

This study was funded from Heart and Stroke Foundation of Canada (HSFC GIA19-26333).

MKK and PCA hold Mid-Career Investigator Awards from the Heart and Stroke Foundation of Canada. MKK holds the Lillian Love Chair in Women's Health from the University Health Network/University of Toronto. MVV holds a Fellowship Award from the Canadian Institutes of Health Research.

**Competing interests** – none.



## References

- 1 Vang Z, Sigouin J, Flenon A, *et al*. The Healthy Immigrant Effect in Canada: A Systematic Review. *Population Change and Lifecourse Strategic Knowledge Cluster Discussion Paper Series/ Un Réseau stratégique de connaissances Changements de population et parcours de vie Document de travail* 2015;**3**.<http://ir.lib.uwo.ca/pclcl/vol3/iss1/4>
- 2 Syse A, Dzamarija MT, Kumar BN, *et al*. An observational study of immigrant mortality differences in Norway by reason for migration, length of stay and characteristics of sending countries. *BMC Public Health* 2018;**18**:508. doi:10.1186/s12889-018-5435-4
- 3 Omariba DWR, Ng E, Vissandjée B. Differences between immigrants at various durations of residence and host population in all-cause mortality, Canada 1991-2006. *Population Studies* 2014;**68**:339–57. doi:10.1080/00324728.2014.915050
- 4 McKeigue PM, Marmot MG. Mortality from coronary heart disease in Asian communities in London. *BMJ* 1988;**297**:903. doi:10.1136/bmj.297.6653.903
- 5 Cheung MC, Earle CC, Fischer HD, *et al*. Impact of Immigration Status on Cancer Outcomes in Ontario, Canada. *J Oncol Pract* 2017;**13**:e602–12. doi:10.1200/JOP.2016.019497
- 6 Tu JV, Chu A, Donovan LR, *et al*. The Cardiovascular Health in Ambulatory Care Research Team (CANHEART). *Circulation: Cardiovascular Quality and Outcomes* 2015;**8**:204–12. doi:10.1161/CIRCOUTCOMES.114.001416
- 7 Paszat L, Sutradhar R, Liu Y, *et al*. Risk of colorectal cancer among immigrants to Ontario, Canada. *BMC Gastroenterol* 2017;**17**:85. doi:10.1186/s12876-017-0642-5
- 8 Anderson KK, Cheng J, Susser E, *et al*. Incidence of psychotic disorders among first-generation immigrants and refugees in Ontario. *CMAJ* 2015;**187**:E279–86. doi:10.1503/cmaj.141420
- 9 Marmot MG, Adelstein AM, Bulusu L. Lessons from the study of immigrant mortality. *Lancet* 1984;**1**:1455–7.
- 10 McDonald JT, Kennedy S. Insights into the 'healthy immigrant effect': health status and health service use of immigrants to Canada. *Social Science & Medicine (1982)* 2004;**59**:1613–27. doi:10.1016/j.socscimed.2004.02.004
- 11 Markides KS, Eschbach K. Aging, migration, and mortality: current status of research on the Hispanic paradox. *J Gerontol B Psychol Sci Soc Sci* 2005;**60 Spec No 2**:68–75. doi:10.1093/geronb/60.special\_issue\_2.s68
- 12 Khan AM, Urquia M, Kornas K, *et al*. Socioeconomic gradients in all-cause, premature and avoidable mortality among immigrants and long-term residents using linked death records in Ontario, Canada. *J Epidemiol Community Health* 2017;**71**:625–32. doi:10.1136/jech-2016-208525
- 13 Aldridge RW, Nellums LB, Bartlett S, *et al*. Global patterns of mortality in international migrants: a systematic review and meta-analysis. *The Lancet* 2018;**392**:2553–66. doi:10.1016/S0140-6736(18)32781-8

- 1  
2  
3 14 Akl EA, Briel M, You JJ, *et al.* Potential impact on estimated treatment effects of information  
4 lost to follow-up in randomised controlled trials (LOST-IT): systematic review. *BMJ*  
5 2012;**344**. doi:10.1136/bmj.e2809  
6  
7 15 Greenland S. Response and follow-up bias in cohort studies. *Am J Epidemiol*  
8 1977;**106**:184–7. doi:10.1093/oxfordjournals.aje.a112451  
9  
10 16 Ontario Demographic Quarterly: Highlights of first quarter 2020 | Ontario.ca.  
11 <https://www.ontario.ca/page/ontario-demographic-quarterly-highlights-first-quarter-2020>  
12 (accessed 26 Apr 2021).  
13  
14 17 Government of Canada SC. The Daily — Immigration and ethnocultural diversity: Key  
15 results from the 2016 Census. 2017. [http://www.statcan.gc.ca/daily-](http://www.statcan.gc.ca/daily-quotidien/171025/dq171025b-eng.htm)  
16 [quotidien/171025/dq171025b-eng.htm](http://www.statcan.gc.ca/daily-quotidien/171025/dq171025b-eng.htm) (accessed 26 Oct 2017).  
17  
18 18 Kapral MK, Hall RE, Silver FL, *et al.* Registry of the Canadian Stroke Network. Report on the  
19 2004/05 Ontario Stroke Audit. [https://www.ices.on.ca/~media/Files/Atlases-](https://www.ices.on.ca/~media/Files/Atlases-Reports/2009/RCSN-report-on-2004-05-Ontario-stroke-audit/Full-report.ashx)  
20 [Reports/2009/RCSN-report-on-2004-05-Ontario-stroke-audit/Full-report.ashx](https://www.ices.on.ca/~media/Files/Atlases-Reports/2009/RCSN-report-on-2004-05-Ontario-stroke-audit/Full-report.ashx)  
21  
22 19 Hall S, Schulze K, Groome P, *et al.* Using cancer registry data for survival studies: the  
23 example of the Ontario Cancer Registry. *J Clin Epidemiol* 2006;**59**:67–76.  
24 doi:10.1016/j.jclinepi.2005.05.001  
25  
26 20 Kurdyak P, Lin E, Green D, *et al.* Validation of a Population-Based Algorithm to Detect  
27 Chronic Psychotic Illness. *Can J Psychiatry* 2015;**60**:362–8.  
28 doi:10.1177/070674371506000805  
29  
30 21 Tu K, Chen Z, Lipscombe LL. Prevalence and incidence of hypertension from 1995 to 2005:  
31 a population-based study. *CMAJ* 2008;**178**:1429–35. doi:10.1503/cmaj.071283  
32  
33 22 Hux JE, Ivis F, Flintoft V, *et al.* Diabetes in Ontario: determination of prevalence and  
34 incidence using a validated administrative data algorithm. *Diabetes Care* 2002;**25**:512–6.  
35  
36 23 Gershon AS, Wang C, Guan J, *et al.* Identifying individuals with physician diagnosed COPD  
37 in health administrative databases. *COPD* 2009;**6**:388–94.  
38  
39 24 Schultz SE, Rothwell DM, Chen Z, *et al.* Identifying cases of congestive heart failure from  
40 administrative data: a validation study using primary care patient records. *Chronic Dis Inj*  
41 *Can* 2013;**33**:160–6.  
42  
43 25 Tu K, Nieuwlaat R, Cheng SY, *et al.* Identifying Patients With Atrial Fibrillation in  
44 Administrative Data. *Canadian Journal of Cardiology* 2016;**32**:1561–5.  
45 doi:10.1016/j.cjca.2016.06.006  
46  
47 26 Osypuk TL, Alonso A, Bates LM. Understanding the Healthy Immigrant Effect and  
48 Cardiovascular Disease: Looking to Big Data and Beyond. *Circulation* 2015;**132**:1522–4.  
49 doi:10.1161/CIRCULATIONAHA.115.018707  
50  
51 27 Yi SS, Thorpe LE, Zanowski JM, *et al.* Clinical Characteristics and Lifestyle Behaviors in a  
52 Population-Based Sample of Chinese and South Asian Immigrants With Hypertension. *Am J*  
53 *Hypertens* 2016;**29**:941–7. doi:10.1093/ajh/hpw014  
54  
55  
56  
57  
58  
59  
60

- 1  
2  
3 28 Abraído-Lanza AF, Dohrenwend BP, Ng-Mak DS, *et al.* The Latino mortality paradox: a test  
4 of the 'salmon bias' and healthy migrant hypotheses. *Am J Public Health* 1999;**89**:1543–8.  
5 doi:10.2105/ajph.89.10.1543  
6
- 7 29 Yarnell CJ, Fu L, Manuel D, *et al.* Association Between Immigrant Status and End-of-Life  
8 Care in Ontario, Canada. *JAMA* 2017;**318**:1479–88. doi:10.1001/jama.2017.14418  
9
- 10 30 Chen A, Kazanjian A. 516: Ethnicity, Time in Canada and Pap Testing among Recent  
11 Immigrants to British Columbia, Canada. *Am J Epidemiol* 2005;**161**:S129–S129.  
12 doi:10.1093/aje/161.Supplement\_1.S129c  
13
- 14 31 Berthold SM, Kong S, Mollica RF, *et al.* Comorbid mental and physical health and health  
15 access in Cambodian refugees in the US. *J Community Health* 2014;**39**:1045–52.  
16 doi:10.1007/s10900-014-9861-7  
17
- 18 32 Hollander A-C. Social inequalities in mental health and mortality among refugees and other  
19 immigrants to Sweden – epidemiological studies of register data. *Glob Health Action* 2013;**6**.  
20 doi:10.3402/gha.v6i0.21059  
21
- 22 33 Borges G, Orozco R, Rafful C, *et al.* Suicidality, ethnicity and immigration in the USA.  
23 *Psychol Med* 2012;**42**:1175–84. doi:10.1017/S0033291711002340  
24
- 25 34 Saunders NR, Lebenbaum M, Stukel TA, *et al.* Suicide and self-harm trends in recent  
26 immigrant youth in Ontario, 1996-2012: a population-based longitudinal cohort study. *BMJ*  
27 *Open* 2017;**7**:e014863. doi:10.1136/bmjopen-2016-014863  
28
- 29 35 Bonifazi C, Paparusso A. Remain or return home: The migration intentions of first-generation  
30 migrants in Italy. *Population, Space and Place* 2019;**25**:e2174. doi:10.1002/psp.2174  
31
- 32 36 Diaz CJ, Koning SM, Martinez-Donate AP. Moving Beyond Salmon Bias: Mexican Return  
33 Migration and Health Selection. *Demography* 2016;**53**:2005–30. doi:10.1007/s13524-016-  
34 0526-2  
35
- 36 37 Saunders NR, Gill PJ, Holder L, *et al.* Use of the emergency department as a first point of  
37 contact for mental health care by immigrant youth in Canada: a population-based study.  
38 *CMAJ* 2018;**190**:E1183–91. doi:10.1503/cmaj.180277  
39
- 40 38 Derr AS. Mental Health Service Use Among Immigrants in the United States: A Systematic  
41 Review. *Psychiatr Serv* 2016;**67**:265–74. doi:10.1176/appi.ps.201500004  
42
- 43 39 Norredam M, Hansen OH, Petersen JH, *et al.* Remigration of migrants with severe disease:  
44 myth or reality?--a register-based cohort study. *Eur J Public Health* 2015;**25**:84–9.  
45 doi:10.1093/eurpub/cku138  
46
- 47 40 Arenas E, Goldman N, Pebley AR, *et al.* Return Migration to Mexico: Does Health Matter?  
48 *Demography* 2015;**52**:1853–68. doi:10.1007/s13524-015-0429-7  
49
- 50 41 Kennedy S, Kidd MP, McDonald JT, *et al.* The Healthy Immigrant Effect: Patterns and  
51 Evidence from Four Countries. *Int Migration & Integration* 2015;**16**:317–32.  
52 doi:10.1007/s12134-014-0340-x  
53  
54  
55  
56  
57  
58  
59  
60

- 1  
2  
3 42 Wallace M, Kulu H. Low immigrant mortality in England and Wales: a data artefact? *Soc Sci*  
4 *Med* 2014;**120**:100–9. doi:10.1016/j.socscimed.2014.08.032  
5  
6 43 Murray CJ, Lopez AD. Global mortality, disability, and the contribution of risk factors: Global  
7 Burden of Disease Study. *Lancet* 1997;**349**:1436–42. doi:10.1016/S0140-6736(96)07495-8  
8  
9 44 GBD 2015 Tobacco Collaborators. Smoking prevalence and attributable disease burden in  
10 195 countries and territories, 1990–2015: a systematic analysis from the Global Burden of  
11 Disease Study 2015. *Lancet* 2017;**389**:1885–906. doi:10.1016/S0140-6736(17)30819-X  
12  
13 45 Interprovincial Mobility of Immigrants in Canada 2006–2011 - Canada.ca.  
14 [https://www.canada.ca/en/immigration-refugees-citizenship/corporate/reports-](https://www.canada.ca/en/immigration-refugees-citizenship/corporate/reports-statistics/research/interprovincial-mobility-immigrants-canada-2006-2011.html)  
15 [statistics/research/interprovincial-mobility-immigrants-canada-2006-2011.html](https://www.canada.ca/en/immigration-refugees-citizenship/corporate/reports-statistics/research/interprovincial-mobility-immigrants-canada-2006-2011.html) (accessed 2  
16 Mar 2020).  
17  
18 46 Youens D, Preen DB, Harris MN, *et al.* The importance of historical residential address  
19 information in longitudinal studies using administrative health data. *Int J Epidemiol*  
20 2018;**47**:69–80. doi:10.1093/ije/dyx156  
21  
22  
23  
24  
25  
26  
27  
28  
29  
30  
31  
32  
33  
34  
35  
36  
37  
38  
39  
40  
41  
42  
43  
44  
45  
46  
47  
48  
49  
50  
51  
52  
53  
54  
55  
56  
57  
58  
59  
60

1  
2  
3 **Figure 1.** Cohort selection and follow-up.  
4

5 Footnote: values in parenthesis represent proportion.  
6  
7  
8  
9  
10  
11  
12  
13  
14  
15  
16  
17  
18  
19  
20  
21  
22  
23  
24  
25  
26  
27  
28  
29  
30  
31  
32  
33  
34  
35  
36  
37  
38  
39  
40  
41  
42  
43  
44  
45  
46  
47  
48  
49  
50  
51  
52  
53  
54  
55  
56  
57  
58  
59  
60

For peer review only

**Table 1.** Baseline characteristics in immigrants and long-term residents with a first-ever diagnosis of ischemic stroke, cancer or schizophrenia between 2002 and 2012 in Ontario, Canada.

|                                            | Ischemic stroke |                     | Cancer        |                     | Schizophrenia |                     |
|--------------------------------------------|-----------------|---------------------|---------------|---------------------|---------------|---------------------|
|                                            | Immigrants      | Long-term residents | Immigrants    | Long-term residents | Immigrants    | Long-term residents |
|                                            | 2078 (8.5)      | 22,479 (91.5)       | 26,084 (8.4)  | 284,445 (91.6)      | 9525 (17.4)   | 45,166 (82.6)       |
| Female, n (%)                              | 982 (47.3)      | 10,697 (47.6)       | 13,602 (52.1) | 130,324 (45.8)      | 4346 (45.6)   | 19,943 (44.2)       |
| Median age in years at index event (Q1-Q3) | 68 (55-78)      | 74 (63-82)          | 58 (48-70)    | 67 (58-76)          | 34 (25-45)    | 40 (26-53)          |
| Neighbourhood-level income, n (%)          |                 |                     |               |                     |               |                     |
| Lowest quintile (1 <sup>st</sup> )         | 668 (32.1)      | 5043 (22.4)         | 7041 (27.0)   | 50,044 (17.6)       | 3803 (39.9)   | 13,525 (29.9)       |
| Highest quintile (5 <sup>th</sup> )        | 201 (9.7)       | 4330 (19.3)         | 3326 (12.8)   | 62,667 (22.0)       | 734 (7.7)     | 6434 (14.2)         |
| Hypertension, n (%)                        | 1420 (68.3)     | 16,046 (71.4)       | 11,120 (42.6) | 152,177 (53.5)      | 1165 (12.2)   | 8253 (18.3)         |
| Diabetes, n (%)                            | 727 (35.0)      | 6495 (28.9)         | 4850 (18.6)   | 53,444 (18.8)       | 737 (7.7)     | 4178 (9.3)          |
| Congestive heart failure, n (%)            | 258 (12.4)      | 3728 (16.6)         | 878 (3.4)     | 20,721 (7.3)        | 59 (0.6)      | 807 (1.8)           |
| COPD, n (%)                                | 111 (5.3)       | 2547 (11.3)         | 1023 (3.9)    | 31,745 (11.2)       | 60 (0.6)      | 1494 (3.3)          |
| Atrial fibrillation, n (%)                 | 243 (11.7)      | 3786 (16.8)         | 777 (3.0)     | 19,278 (6.8)        | 34 (0.4)      | 525 (1.2)           |

3 COPD – chronic obstructive pulmonary disease.

1 **Table 2.** Loss to follow-up and mortality in immigrants and long-term residents in Ontario, Canada.

|                                                                                                   | Ischemic stroke  |                     | Cancer           |                     | Schizophrenia    |                     |
|---------------------------------------------------------------------------------------------------|------------------|---------------------|------------------|---------------------|------------------|---------------------|
|                                                                                                   | Immigrants       | Long-term residents | Immigrants       | Long-term residents | Immigrants       | Long-term residents |
| N (%)                                                                                             | 2078 (8.5)       | 22,479 (91.5)       | 26,084 (8.4)     | 284,445 (91.6)      | 9525 (17.4)      | 45,166 (82.6)       |
| Loss to follow-up, n (%)                                                                          | 158 (7.6)        | 512 (2.3)           | 2016 (7.7)       | 5995 (2.1)          | 1238 (13.0)      | 3748 (8.3)          |
| Adjusted HR of loss to follow-up (95% CI) <sup>a</sup> accounting for the competing risk of death | 2.87 (2.38-3.44) | 1.00                | 3.07 (2.91-3.23) | 1.00                | 1.54 (1.44-1.64) | 1.00                |
| Death, n (%)                                                                                      | 796 (35.4)       | 12,575 (55.9)       | 9014 (34.6)      | 146,723 (51.6)      | 546 (5.7)        | 6647 (14.7)         |
| Unadjusted HR of death (95 %CI)                                                                   | 0.61 (0.56-0.65) | 1.00                | 0.60 (0.59-0.62) | 1.00                | 0.39 (0.35-0.42) | 1.00                |
| Adjusted HR <sup>a</sup> (95% CI) not accounting for loss to follow-up                            | 0.78 (0.73-0.84) | 1.00                | 0.74 (0.73-0.76) | 1.00                | 0.54 (0.50-0.59) | 1.00                |
| Adjusted HR <sup>a</sup> (95% CI) accounting for loss to follow-up <sup>b</sup>                   | 0.83 (0.77-0.89) | 1.00                | 0.78 (0.76-0.79) | 1.00                | 0.56 (0.51-0.61) | 1.00                |
| Sensitivity analyses <sup>c</sup>                                                                 |                  |                     |                  |                     |                  |                     |
| Death within 30 days of loss to follow-up                                                         |                  |                     |                  |                     |                  |                     |
| Adjusted HR (95% CI)                                                                              | 0.93 (0.87-1.00) | 1.00                | 0.90 (0.88-0.91) | 1.00                | 1.00 (0.95-1.05) | 1.00                |
| Death within 1 year of loss to follow-up                                                          |                  |                     |                  |                     |                  |                     |
| Adjusted HR (95% CI)                                                                              | 0.93 (0.87-0.99) | 1.00                | 0.89 (0.87-0.91) | 1.00                | 1.00 (0.95-1.06) | 1.00                |

<sup>a</sup>Multivariable model adjusting for the following: age, sex, neighbourhood-level income, and comorbidities (known hypertension, diabetes, congestive heart failure, chronic obstructive pulmonary disease, and atrial fibrillation); <sup>b</sup>censoring those who were lost to follow-up, which was determined when date of last health system contact occurred before end of follow-up among those alive; <sup>c</sup>assigning date of death among those lost to follow-up and re-calculating adjusted hazard of death.

Abbreviations: HR – hazard ratio, CI – confidence interval.

1  
2  
3  
4  
5  
6  
7  
8  
9  
10  
11  
12  
13  
14  
15  
16  
17  
18  
19  
20  
21  
22  
23  
24  
25  
26  
27  
28  
29  
30  
31  
32  
33  
34  
35  
36  
37  
38  
39  
40  
41  
42  
43  
44  
45  
46  
47  
48  
49  
50  
51  
52  
53  
54  
55  
56  
57  
58  
59  
60

1 **Figure 2.** Unadjusted cumulative incidence functions in immigrants (blue) and long-term  
2 residents (red) showing probability of death and of loss to follow-up in patients with  
3 ischemic stroke (top), cancer (middle) and schizophrenia (bottom).

For peer review only



1  
2  
3 **Figure 3.** Ratios of adjusted hazard ratios of death obtained using two multivariable cox-  
4 regression models with and without accounting for loss to follow-up. Each box  
5 represents the point estimate of this ratio, and the error bars represent 95% confidence  
6 limits. Values less than 1 suggest overestimation of the magnitude of association when  
7 loss to follow-up is not accounted for.  
8  
9

10 Footnote: Immigrants are compared to long-term residents; age less than 55 years is the comparison group; and the  
11 5<sup>th</sup> quintile of income represent the HR of death in the highest quintile compared to lowest quintile based on  
12 neighbourhood-level income.  
13  
14  
15  
16  
17  
18  
19  
20  
21  
22  
23  
24  
25  
26  
27  
28  
29  
30  
31  
32  
33  
34  
35  
36  
37  
38  
39  
40  
41  
42  
43  
44  
45  
46  
47  
48  
49  
50  
51  
52  
53  
54  
55  
56  
57  
58  
59  
60

For peer review only



Figure 1



Figure 2

1  
2  
3  
4  
5  
6  
7  
8  
9  
10  
11  
12  
13  
14  
15  
16  
17  
18  
19  
20  
21  
22  
23  
24  
25  
26  
27  
28  
29  
30  
31  
32  
33  
34  
35  
36  
37  
38  
39  
40  
41  
42  
43  
44  
45  
46  
47  
48  
49  
50  
51  
52  
53  
54  
55  
56  
57  
58  
59  
60

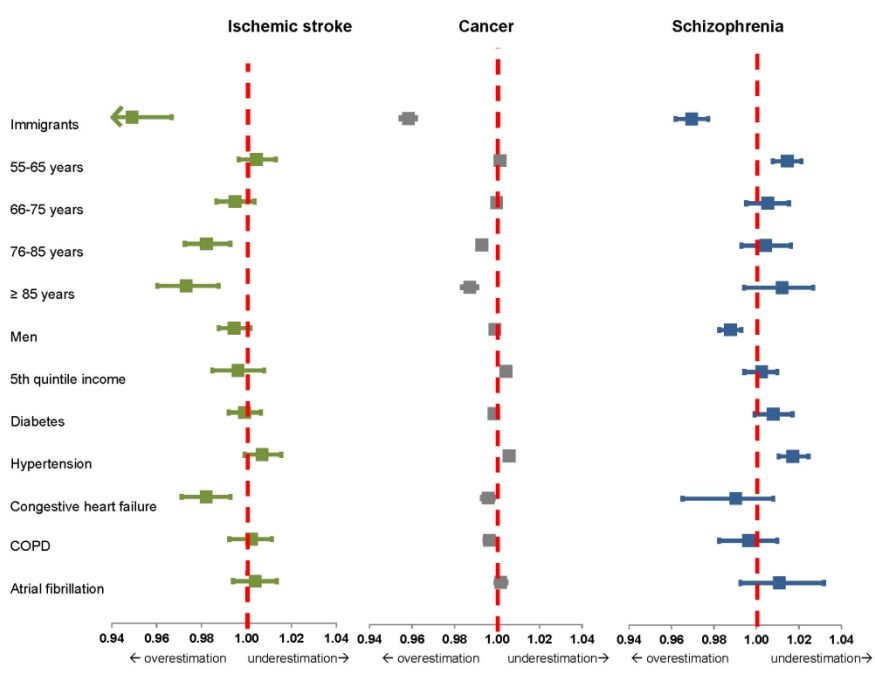

Figure 3

279x215mm (200 x 200 DPI)

## Appendix

**e-table 1.** Definitions of variables included in the study.

**e-table 2.** Administrative databases used to determine date of last health system contact and statistics on contact with health care system in Ontario.

**e-table 3.** Characteristics of immigrants included in the study.

**e-table 4.** Results of sensitivity analyses using a lag-time of 6 months when determining the date of last health system contact.

**e-figure 1.** Hypothetical cases to illustrate loss to follow-up using administrative database. Subject A was not lost to follow-up, Subject B would be considered lost to follow-up, and Subject C had the event of interest (death) and so is not considered lost to follow-up.

**e-figure 2.** Sensitivity analyses adding 180 days to last date of follow-up. Only for Subject B does addition of 180 days to follow-up change their censoring time; whereas, censoring times remain same for Subject A and C.

**e-table 1.** Definitions of variables included in the study.

| Variable                 | Definition                                                                                                                                                                                                                                                                                                                                                                                                                                                                                                             |
|--------------------------|------------------------------------------------------------------------------------------------------------------------------------------------------------------------------------------------------------------------------------------------------------------------------------------------------------------------------------------------------------------------------------------------------------------------------------------------------------------------------------------------------------------------|
| Incident ischemic stroke | Hospitalized or non-hospitalized (seen in the emergency department but not admitted) adult patients with confirmed acute ischemic stroke between April 1, 2002 and March 31, 2013 seen at all 150 acute care institutions in the province. Participating hospitals included comprehensive stroke centres and non-stroke centres. Information gathered using chart abstractors with neurological expertise, with the final diagnosis and other data elements obtained through review of clinical and neuroimaging data. |
| Incident primary cancer  | A diagnosis of cancer either in hospitalized or non-hospitalized adult patients obtained from 4 different sources: hospital or ER visit using appropriate ICD codes, pathology reports with a diagnosis of cancer, regional cancer centres where patients with cancer are seen, and death certificates.                                                                                                                                                                                                                |
| Incident schizophrenia   | A primary diagnosis of schizophrenia or schizoaffective disorder from a general hospital bed (prior to 2002, ICD9 - 295; as of 2002 ICD10 - F20 or F25)<br><b>OR</b><br>primary diagnosis of schizophrenia from a psychiatric hospital bed (DSM-IV – 295.x)<br><b>OR</b><br>three outpatient visits with a diagnosis of schizophrenia (295 or F20/F25) from outpatient physician billings within a 3-year period.<br><br>93.1% Sensitivity - 58.7% Specificity                                                         |

|                                              |                                                                                                                                                                                                                                                                                                                                                                 |
|----------------------------------------------|-----------------------------------------------------------------------------------------------------------------------------------------------------------------------------------------------------------------------------------------------------------------------------------------------------------------------------------------------------------------|
| Hypertension                                 | <p>≥ 1 Hospitalization [add diagnostic codes to be consistent with DM section? Same for other variables.]</p> <p><b>OR</b></p> <p>≥ 2 physician claims in a two-year period</p> <p><b>OR</b></p> <p>1 physician claim followed by another physician claim or hospitalization within two years.</p> <p>72% Sensitivity - 95% Specificity - 87% PPV - 88% NPV</p> |
| Diabetes                                     | <p>≥ 3 physician claims for diagnostic code (250) in a one-year period</p> <p>79.9% Sensitivity - 99.1% Specificity - 91.4% PPV</p>                                                                                                                                                                                                                             |
| CHF (congestive heart failure)               | <p>≥ 1 Hospitalization</p> <p><b>OR</b></p> <p>1 physician claim in ER or clinic, followed by ≥ 1 Hospitalization, ER visit, or physician claim within one year.</p> <p>84.8% Sensitivity - 97.0% Specificity - 55.6% PPV</p>                                                                                                                                   |
| Atrial fibrillation                          | <p>1 hospitalization or 1 emergency room visit, ICD-10 (2002 onwards) – I48; ICD-9 (pre-2002) – 427.31 or 427.32</p> <p><b>OR</b></p> <p>Technical billing code for cardioversion billing code Z437</p>                                                                                                                                                         |
| COPD (chronic obstructive pulmonary disease) | <p>≥1 Hospitalization for COPD</p> <p><b>OR</b></p> <p>≥ 3 physician claims in a two-year period</p> <p>57.5% Sensitivity - 95.4% Specificity</p>                                                                                                                                                                                                               |

**e-table 2.** Administrative databases used to determine date of last health system contact and statistics on contact with health care system in Ontario.

Updated quarterly



**Abbreviations:**

NRS – National Rehabilitation Reporting System; ODB – Ontario Drug Benefit; NACRS – National Ambulatory Care Reporting System; CIHI-DAD – Canadian Institute for Health Information-Discharge Abstract Database; OHCAS – Ontario Home Care Administration System; HCD – Home Care Database; OHIP – Ontario Health Insurance Plan Claims Database; OMHRS – Ontario Mental Health Reporting System. ED – Emergency Department



**e-table 3.** Characteristics of immigrants included in the study.

| <b>Immigration-specific characteristics</b> | <b>Ischemic stroke<br/>n = 2078</b> | <b>Cancer<br/>n = 26,084</b> | <b>Schizophrenia<br/>n = 9525</b> |
|---------------------------------------------|-------------------------------------|------------------------------|-----------------------------------|
| <i>World region of origin</i>               |                                     |                              |                                   |
| Africa                                      | 81 (3.9)                            | 1128 (4.3)                   | 980 (10.3)                        |
| Caribbean                                   | 193 (9.3)                           | 1902 (7.3)                   | 967 (10.2)                        |
| East Asia                                   | 403 (19.4)                          | 5331 (20.4)                  | 1319 (13.8)                       |
| Latin America                               | 171 (8.2)                           | 1736 (6.7)                   | 738 (7.7)                         |
| Middle East                                 | 194 (9.3)                           | 2701 (10.4)                  | 947 (9.9)                         |
| South Asia                                  | 392 (18.9)                          | 4094 (15.7)                  | 2271 (23.8)                       |
| Western                                     | 526 (25.3)                          | 7525 (28.8)                  | 1895 (19.9)                       |
| Missing                                     | 392 (18.9)                          | 1667 (6.4)                   | 408 (4.3)                         |
| <i>Time since arrival</i>                   |                                     |                              |                                   |
| ≤ 10 years                                  | 677 (32.6)                          | 10360 (39.7)                 | 4763 (50.0)                       |
| > 10 years                                  | 1401 (67.4)                         | 15724 (60.3)                 | 4762 (50.0)                       |
| <i>Immigration class</i>                    |                                     |                              |                                   |
| Economic                                    | 468 (22.5)                          | 9262 (35.5)                  | 3213 (33.7)                       |
| Family or other                             | 1273 (61.3)                         | 13233 (50.7)                 | 3891 (37.8)                       |
| Refugee                                     | 337 (16.2)                          | 3589 (13.8)                  | 2421 (25.4)                       |

**e-table 4.** Results of sensitivity analyses using a lag-time of 6 months when determining the date of last health system contact.

|                                            |                                    | <b>Ischemic stroke</b> | <b>Cancer</b>    | <b>Schizophrenia</b> |
|--------------------------------------------|------------------------------------|------------------------|------------------|----------------------|
| Immigrants                                 | Lost to follow-up, n (%)           | 145 (7.0)              | 1895 (7.3)       | 1120 (11.8)          |
| Long-term residents                        |                                    | 472 (2.1)              | 5472 (1.9)       | 3333 (7.4)           |
| Immigrants                                 | Death, n (%)                       | 796 (35.4)             | 9014 (34.6)      | 546 (5.7)            |
| Long-term residents                        |                                    | 12,575 (55.9)          | 146,723 (51.6)   | 6647 (14.7)          |
| Adjusted HR of death (95% CI) <sup>^</sup> | Immigrants vs. long-term residents | 0.82 (0.77-0.89)       | 0.77 (0.76-0.79) | 0.56 (0.51-0.61)     |

<sup>^</sup>Accounting for loss of follow-up by censoring those lost to follow-up.

April 1, 2002 Study Duration January 31, 2020



**e-figure 1.** Hypothetical cases to illustrate loss to follow-up using administrative database. Subject A was not lost to follow-up, Subject B would be considered lost to follow-up, and Subject C had the event of interest (death) and so is not considered lost to follow-up.

1  
2  
3  
4  
5  
6  
7  
8  
9  
10  
11  
12  
13  
14  
15  
16  
17  
18  
19  
20  
21  
22  
23  
24  
25  
26  
27  
28  
29  
30  
31  
32  
33  
34  
35  
36  
37  
38  
39  
40  
41  
42  
43  
44  
45  
46  
47



**e-figure 2.** Sensitivity analyses adding 180 days to last date of follow-up. Only for Subject B does addition of 180 days to follow-up change their censoring time; whereas, censoring times remain same for Subject A and C.

STROBE Statement—Checklist of items that should be included in reports of *cohort studies*

|                           | Item No | Recommendation                                                                                                                                                                                    | Location             |
|---------------------------|---------|---------------------------------------------------------------------------------------------------------------------------------------------------------------------------------------------------|----------------------|
| <b>Title and abstract</b> | 1       | (a) Indicate the study's design with a commonly used term in the title or the abstract                                                                                                            | Page 2               |
|                           |         | (b) Provide in the abstract an informative and balanced summary of what was done and what was found                                                                                               | Page 2               |
| <b>Introduction</b>       |         |                                                                                                                                                                                                   |                      |
| Background/rationale      | 2       | Explain the scientific background and rationale for the investigation being reported                                                                                                              | Page 4               |
| Objectives                | 3       | State specific objectives, including any prespecified hypotheses                                                                                                                                  | Page 4               |
| <b>Methods</b>            |         |                                                                                                                                                                                                   |                      |
| Study design              | 4       | Present key elements of study design early in the paper                                                                                                                                           | Page 5               |
| Setting                   | 5       | Describe the setting, locations, and relevant dates, including periods of recruitment, exposure, follow-up, and data collection                                                                   | Page 5               |
| Participants              | 6       | (a) Give the eligibility criteria, and the sources and methods of selection of participants. Describe methods of follow-up                                                                        | Page 5 and e-table 2 |
|                           |         | (b) For matched studies, give matching criteria and number of exposed and unexposed                                                                                                               | n.a.                 |
| Variables                 | 7       | Clearly define all outcomes, exposures, predictors, potential confounders, and effect modifiers. Give diagnostic criteria, if applicable                                                          | Page 5 and e-table 1 |
| Data sources/ measurement | 8*      | For each variable of interest, give sources of data and details of methods of assessment (measurement). Describe comparability of assessment methods if there is more than one group              | Page 5 and e-table 1 |
| Bias                      | 9       | Describe any efforts to address potential sources of bias                                                                                                                                         | Page 6               |
| Study size                | 10      | Explain how the study size was arrived at                                                                                                                                                         | Figure 1             |
| Quantitative variables    | 11      | Explain how quantitative variables were handled in the analyses. If applicable, describe which groupings were chosen and why                                                                      | Table 1              |
| Statistical methods       | 12      | (a) Describe all statistical methods, including those used to control for confounding                                                                                                             | Page 6-7             |
|                           |         | (b) Describe any methods used to examine subgroups and interactions                                                                                                                               | Page 6-7             |
|                           |         | (c) Explain how missing data were addressed                                                                                                                                                       | None present         |
|                           |         | (d) If applicable, explain how loss to follow-up was addressed                                                                                                                                    | e-table 2 and page 7 |
|                           |         | (e) Describe any sensitivity analyses                                                                                                                                                             | Page 8               |
| <b>Results</b>            |         |                                                                                                                                                                                                   |                      |
| Participants              | 13*     | (a) Report numbers of individuals at each stage of study—eg numbers potentially eligible, examined for eligibility, confirmed eligible, included in the study, completing follow-up, and analysed | Figure 1             |
|                           |         | (b) Give reasons for non-participation at each stage                                                                                                                                              | Figure 1             |

|                          |     |                                                                                                                                                                                                              |                        |
|--------------------------|-----|--------------------------------------------------------------------------------------------------------------------------------------------------------------------------------------------------------------|------------------------|
|                          |     | (c) Consider use of a flow diagram                                                                                                                                                                           | Figure 1               |
| Descriptive data         | 14* | (a) Give characteristics of study participants (eg demographic, clinical, social) and information on exposures and potential confounders                                                                     | Table 1                |
|                          |     | (b) Indicate number of participants with missing data for each variable of interest                                                                                                                          | None with missing data |
|                          |     | (c) Summarise follow-up time (eg, average and total amount)                                                                                                                                                  | Page 8                 |
| Outcome data             | 15* | Report numbers of outcome events or summary measures over time                                                                                                                                               | Page 9 and Table 2     |
| Main results             | 16  | (a) Give unadjusted estimates and, if applicable, confounder-adjusted estimates and their precision (eg, 95% confidence interval). Make clear which confounders were adjusted for and why they were included | Page 9, and table 2    |
|                          |     | (b) Report category boundaries when continuous variables were categorized                                                                                                                                    | Table 2                |
|                          |     | (c) If relevant, consider translating estimates of relative risk into absolute risk for a meaningful time period                                                                                             | n.a.                   |
| Other analyses           | 17  | Report other analyses done—eg analyses of subgroups and interactions, and sensitivity analyses                                                                                                               | Figure 3               |
| <b>Discussion</b>        |     |                                                                                                                                                                                                              |                        |
| Key results              | 18  | Summarise key results with reference to study objectives                                                                                                                                                     | Page 10                |
| Limitations              | 19  | Discuss limitations of the study, taking into account sources of potential bias or imprecision. Discuss both direction and magnitude of any potential bias                                                   | Page 12                |
| Interpretation           | 20  | Give a cautious overall interpretation of results considering objectives, limitations, multiplicity of analyses, results from similar studies, and other relevant evidence                                   | Page 10                |
| Generalisability         | 21  | Discuss the generalisability (external validity) of the study results                                                                                                                                        | Page 12                |
| <b>Other information</b> |     |                                                                                                                                                                                                              |                        |
| Funding                  | 22  | Give the source of funding and the role of the funders for the present study and, if applicable, for the original study on which the present article is based                                                | Page 15                |

\*Give information separately for exposed and unexposed groups.

**Note:** An Explanation and Elaboration article discusses each checklist item and gives methodological background and published examples of transparent reporting. The STROBE checklist is best used in conjunction with this article (freely available on the Web sites of PLoS Medicine at <http://www.plosmedicine.org/>, Annals of Internal Medicine at <http://www.annals.org/>, and Epidemiology at <http://www.epidem.com/>). Information on the STROBE Initiative is available at <http://www.strobe-statement.org>.
