# Supplementary material for: Importance of accounting for loss to follow-up when comparing mortality between immigrants and long-term residents: a population-based retrospective cohort
Source: PubMed Central journal article supplement — BMJ Open. 2021 Nov 1;11(11):e046377. doi: 10.1136/bmjopen-2020-046377 (PMC8565574; doi:10.1136/bmjopen-2020-046377), 2021-11-01
Supplement: bmjopen-2020-046377supp001.pdf [file bmjopen-2020-046377supp001.pdf]

## Appendix

**e-table 1.** Definitions of variables included in the study.

**e-table 2.** Administrative databases used to determine date of last health system contact and statistics on contact with health care system in Ontario.

**e-table 3.** Characteristics of immigrants included in the study.

**e-table 4.** Results of sensitivity analyses using a lag-time of 6 months when determining the date of last health system contact.

**e-figure 1.** Hypothetical cases to illustrate loss to follow-up using administrative database. Subject A was not lost to follow-up, Subject B would be considered lost to follow-up, and Subject C had the event of interest (death) and so is not considered lost to follow-up.

**e-figure 2.** Sensitivity analyses adding 180 days to last date of follow-up. Only for Subject B does addition of 180 days to follow-up change their censoring time; whereas, censoring times remain same for Subject A and C.

**e-table 1.** Definitions of variables included in the study.

| Variable                 | Definition                                                                                                                                                                                                                                                                                                                                                                                                                                                                                                             |
|--------------------------|------------------------------------------------------------------------------------------------------------------------------------------------------------------------------------------------------------------------------------------------------------------------------------------------------------------------------------------------------------------------------------------------------------------------------------------------------------------------------------------------------------------------|
| Incident ischemic stroke | Hospitalized or non-hospitalized (seen in the emergency department but not admitted) adult patients with confirmed acute ischemic stroke between April 1, 2002 and March 31, 2013 seen at all 150 acute care institutions in the province. Participating hospitals included comprehensive stroke centres and non-stroke centres. Information gathered using chart abstractors with neurological expertise, with the final diagnosis and other data elements obtained through review of clinical and neuroimaging data. |
| Incident primary cancer  | A diagnosis of cancer either in hospitalized or non-hospitalized adult patients obtained from 4 different sources: hospital or ER visit using appropriate ICD codes, pathology reports with a diagnosis of cancer, regional cancer centres where patients with cancer are seen, and death certificates.                                                                                                                                                                                                                |
| Incident schizophrenia   | A primary diagnosis of schizophrenia or schizoaffective disorder from a general hospital bed (prior to 2002, ICD9 - 295; as of 2002 ICD10 - F20 or F25)<br><br><b>OR</b><br>primary diagnosis of schizophrenia from a psychiatric hospital bed (DSM-IV – 295.x)<br><br><b>OR</b><br>three outpatient visits with a diagnosis of schizophrenia (295 or F20/F25) from outpatient physician billings within a 3-year period.<br><br>93.1% Sensitivity - 58.7% Specificity                                                 |

|                                              |                                                                                                                                                                                                                                                                                                                                                                 |
|----------------------------------------------|-----------------------------------------------------------------------------------------------------------------------------------------------------------------------------------------------------------------------------------------------------------------------------------------------------------------------------------------------------------------|
| Hypertension                                 | <p>≥ 1 Hospitalization [add diagnostic codes to be consistent with DM section? Same for other variables.]</p> <p><b>OR</b></p> <p>≥ 2 physician claims in a two-year period</p> <p><b>OR</b></p> <p>1 physician claim followed by another physician claim or hospitalization within two years.</p> <p>72% Sensitivity - 95% Specificity - 87% PPV - 88% NPV</p> |
| Diabetes                                     | <p>≥ 3 physician claims for diagnostic code (250) in a one-year period</p> <p>79.9% Sensitivity - 99.1% Specificity - 91.4% PPV</p>                                                                                                                                                                                                                             |
| CHF (congestive heart failure)               | <p>≥ 1 Hospitalization</p> <p><b>OR</b></p> <p>1 physician claim in ER or clinic, followed by ≥ 1 Hospitalization, ER visit, or physician claim within one year.</p> <p>84.8% Sensitivity - 97.0% Specificity - 55.6% PPV</p>                                                                                                                                   |
| Atrial fibrillation                          | <p>1 hospitalization or 1 emergency room visit, ICD-10 (2002 onwards) – I48; ICD-9 (pre-2002) – 427.31 or 427.32</p> <p><b>OR</b></p> <p>Technical billing code for cardioversion billing code Z437</p>                                                                                                                                                         |
| COPD (chronic obstructive pulmonary disease) | <p>≥1 Hospitalization for COPD</p> <p><b>OR</b></p> <p>≥ 3 physician claims in a two-year period</p> <p>57.5% Sensitivity - 95.4% Specificity</p>                                                                                                                                                                                                               |

**e-table 2.** Administrative databases used to determine date of last health system contact and statistics on contact with health care system in Ontario.

Updated quarterly

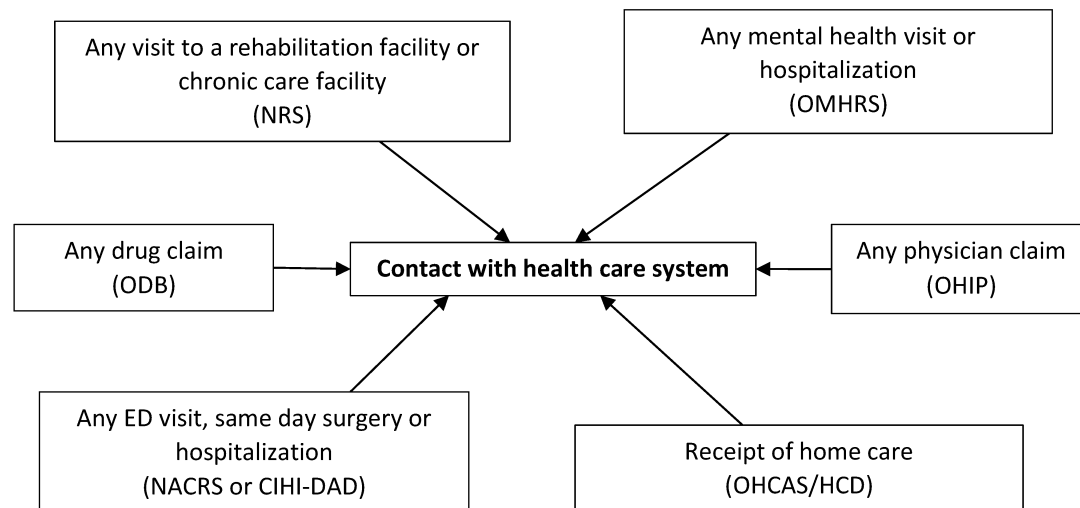

**Abbreviations:**

NRS – National Rehabilitation Reporting System; ODB – Ontario Drug Benefit; NACRS – National Ambulatory Care Reporting System; CIHI-DAD – Canadian Institute for Health Information-Discharge Abstract Database; OHCAS – Ontario Home Care Administration System; HCD – Home Care Database; OHIP – Ontario Health Insurance Plan Claims Database; OMHRS – Ontario Mental Health Reporting System. ED – Emergency Department

**e-table 3.** Characteristics of immigrants included in the study.

| <b>Immigration-specific characteristics</b> | <b>Ischemic stroke<br/>n = 2078</b> | <b>Cancer<br/>n = 26,084</b> | <b>Schizophrenia<br/>n = 9525</b> |
|---------------------------------------------|-------------------------------------|------------------------------|-----------------------------------|
| <i>World region of origin</i>               |                                     |                              |                                   |
| Africa                                      | 81 (3.9)                            | 1128 (4.3)                   | 980 (10.3)                        |
| Caribbean                                   | 193 (9.3)                           | 1902 (7.3)                   | 967 (10.2)                        |
| East Asia                                   | 403 (19.4)                          | 5331 (20.4)                  | 1319 (13.8)                       |
| Latin America                               | 171 (8.2)                           | 1736 (6.7)                   | 738 (7.7)                         |
| Middle East                                 | 194 (9.3)                           | 2701 (10.4)                  | 947 (9.9)                         |
| South Asia                                  | 392 (18.9)                          | 4094 (15.7)                  | 2271 (23.8)                       |
| Western                                     | 526 (25.3)                          | 7525 (28.8)                  | 1895 (19.9)                       |
| Missing                                     | 392 (18.9)                          | 1667 (6.4)                   | 408 (4.3)                         |
|                                             |                                     |                              |                                   |
| <i>Time since arrival</i>                   |                                     |                              |                                   |
| ≤ 10 years                                  | 677 (32.6)                          | 10360 (39.7)                 | 4763 (50.0)                       |
| > 10 years                                  | 1401 (67.4)                         | 15724 (60.3)                 | 4762 (50.0)                       |
|                                             |                                     |                              |                                   |
| <i>Immigration class</i>                    |                                     |                              |                                   |
| Economic                                    | 468 (22.5)                          | 9262 (35.5)                  | 3213 (33.7)                       |
| Family or other                             | 1273 (61.3)                         | 13233 (50.7)                 | 3891 (37.8)                       |
| Refugee                                     | 337 (16.2)                          | 3589 (13.8)                  | 2421 (25.4)                       |

**e-table 4.** Results of sensitivity analyses using a lag-time of 6 months when determining the date of last health system contact.

|                                            |                                    | <b>Ischemic stroke</b> | <b>Cancer</b>    | <b>Schizophrenia</b> |
|--------------------------------------------|------------------------------------|------------------------|------------------|----------------------|
| Immigrants                                 | Lost to follow-up, n (%)           | 145 (7.0)              | 1895 (7.3)       | 1120 (11.8)          |
| Long-term residents                        |                                    | 472 (2.1)              | 5472 (1.9)       | 3333 (7.4)           |
| Immigrants                                 | Death, n (%)                       | 796 (35.4)             | 9014 (34.6)      | 546 (5.7)            |
| Long-term residents                        |                                    | 12,575 (55.9)          | 146,723 (51.6)   | 6647 (14.7)          |
| Adjusted HR of death (95% CI) <sup>^</sup> | Immigrants vs. long-term residents | 0.82 (0.77-0.89)       | 0.77 (0.76-0.79) | 0.56 (0.51-0.61)     |

<sup>^</sup>Accounting for loss of follow-up by censoring those lost to follow-up.

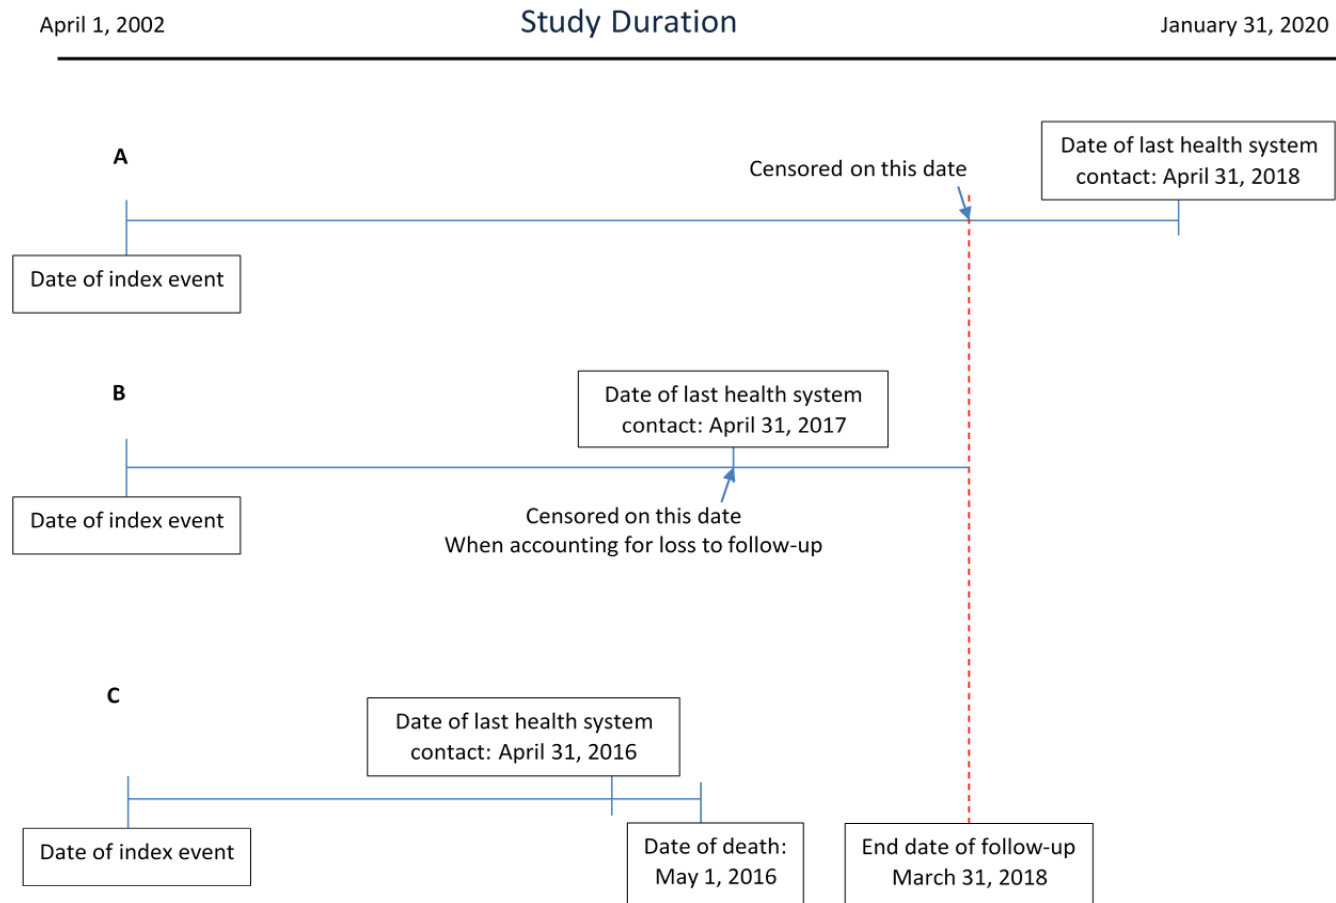

**e-figure 1.** Hypothetical cases to illustrate loss to follow-up using administrative database. Subject A was not lost to follow-up, Subject B would be considered lost to follow-up, and Subject C had the event of interest (death) and so is not considered lost to follow-up.

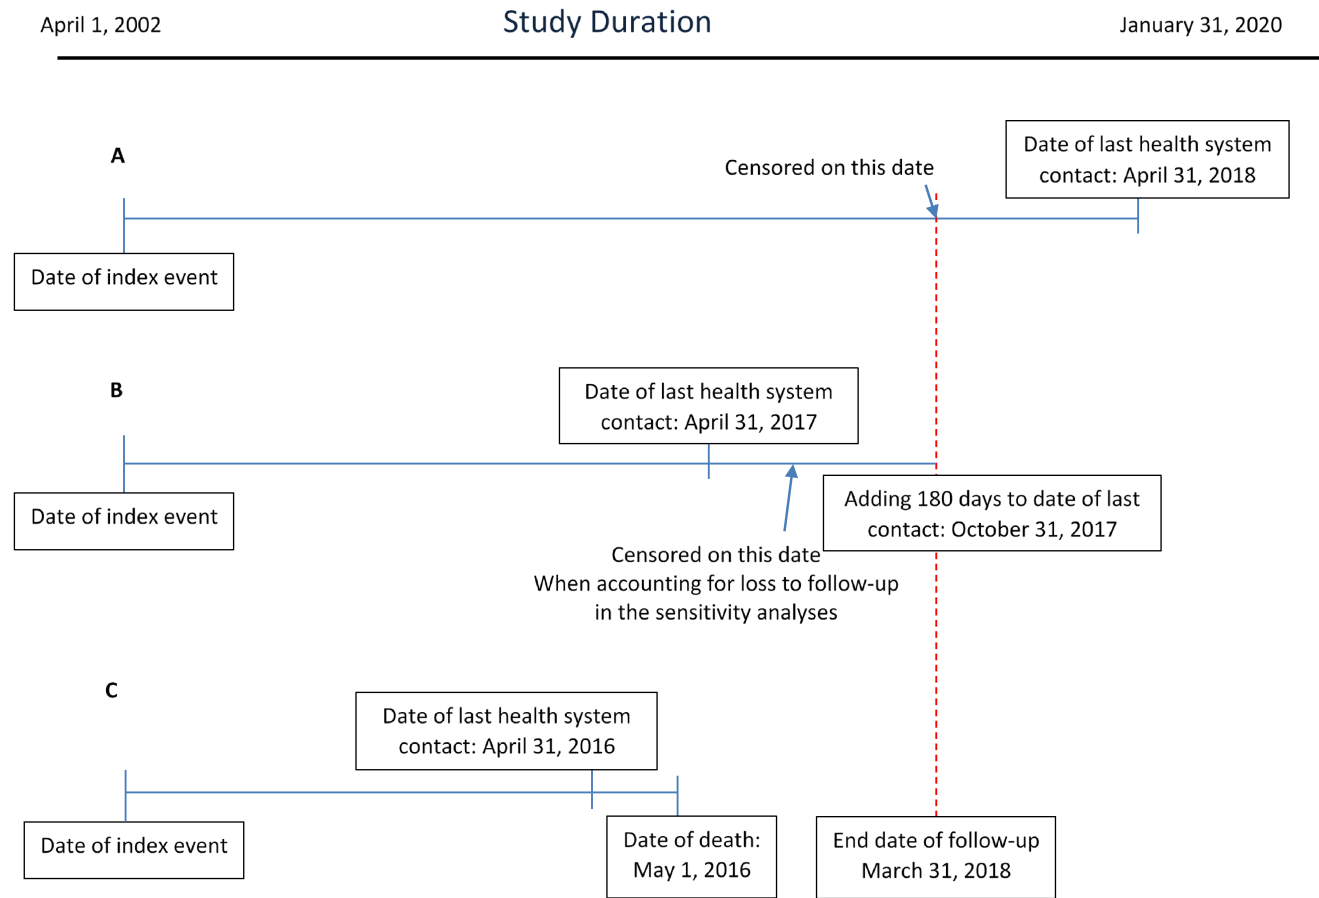

**e-figure 2.** Sensitivity analyses adding 180 days to last date of follow-up. Only for Subject B does addition of 180 days to follow-up change their censoring time; whereas, censoring times remain same for Subject A and C.
